# Supplementary material
Source: PubMed Central journal article supplement (PMC4333721)
Supplement: NIHMS656782-supplement-1.pdf [file NIHMS656782-supplement-1.pdf]

## **Supplementary Materials**

Supplementary Figures 1-7

Supplementary Tables 1-7

Supplementary Note 1

# Supplementary Figure 1

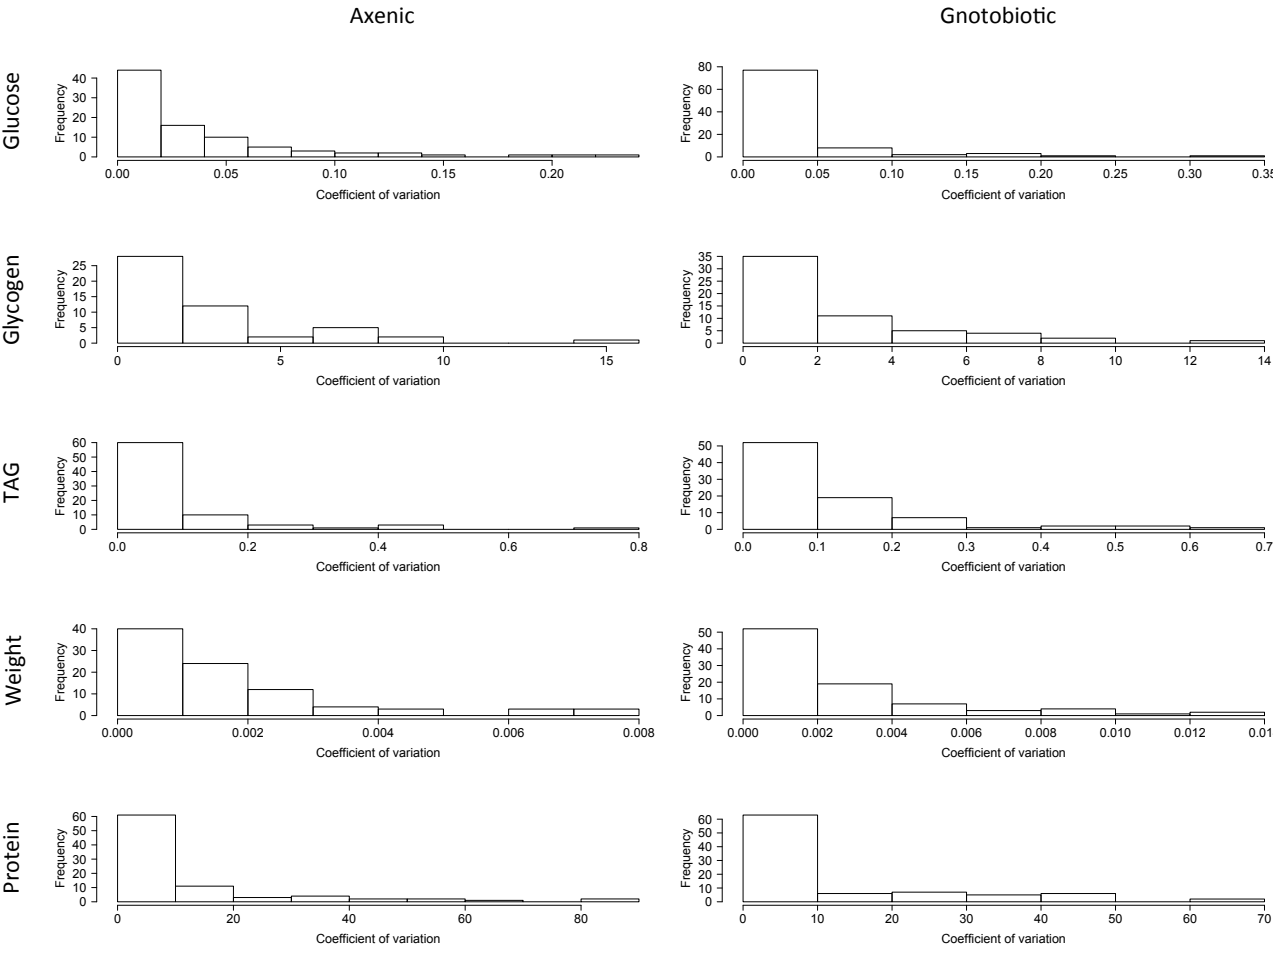

Supplementary Figure 1 . Coefficients of variation (variance/mean) for each DGRP line in each condition. Histograms show that within-line variance was generally low, and equivalent between gnotobiotic and axenic flies.

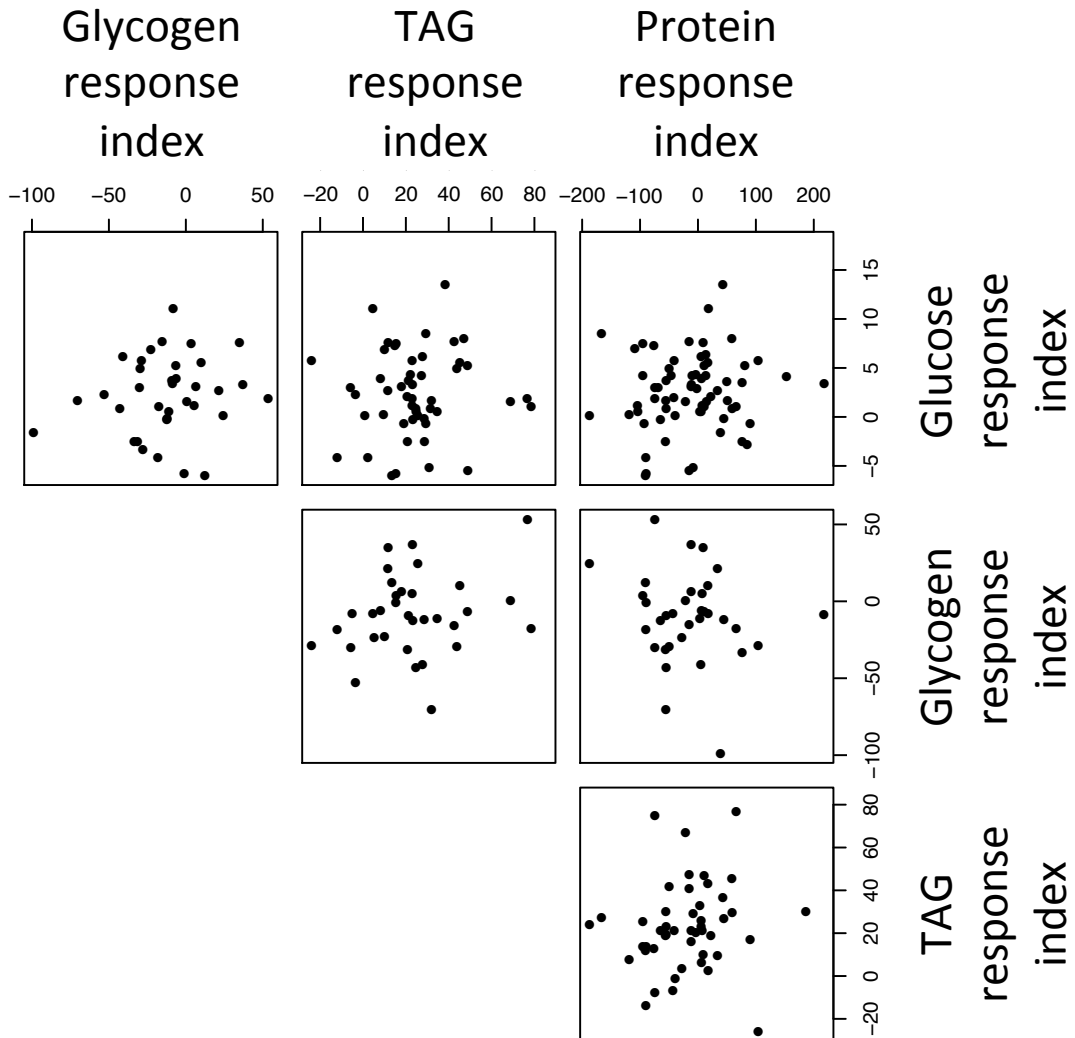

Supplementary Figure 2. Absence of elevated global sensitivity of *Drosophila* nutrition to microbiota. Response indices - calculated as the difference in trait value for each line in axenic or gnotobiotic conditions, normalized to mean population differences between axenic and gnotobiotic flies - are uncorrelated.

Supplementary Figure 3

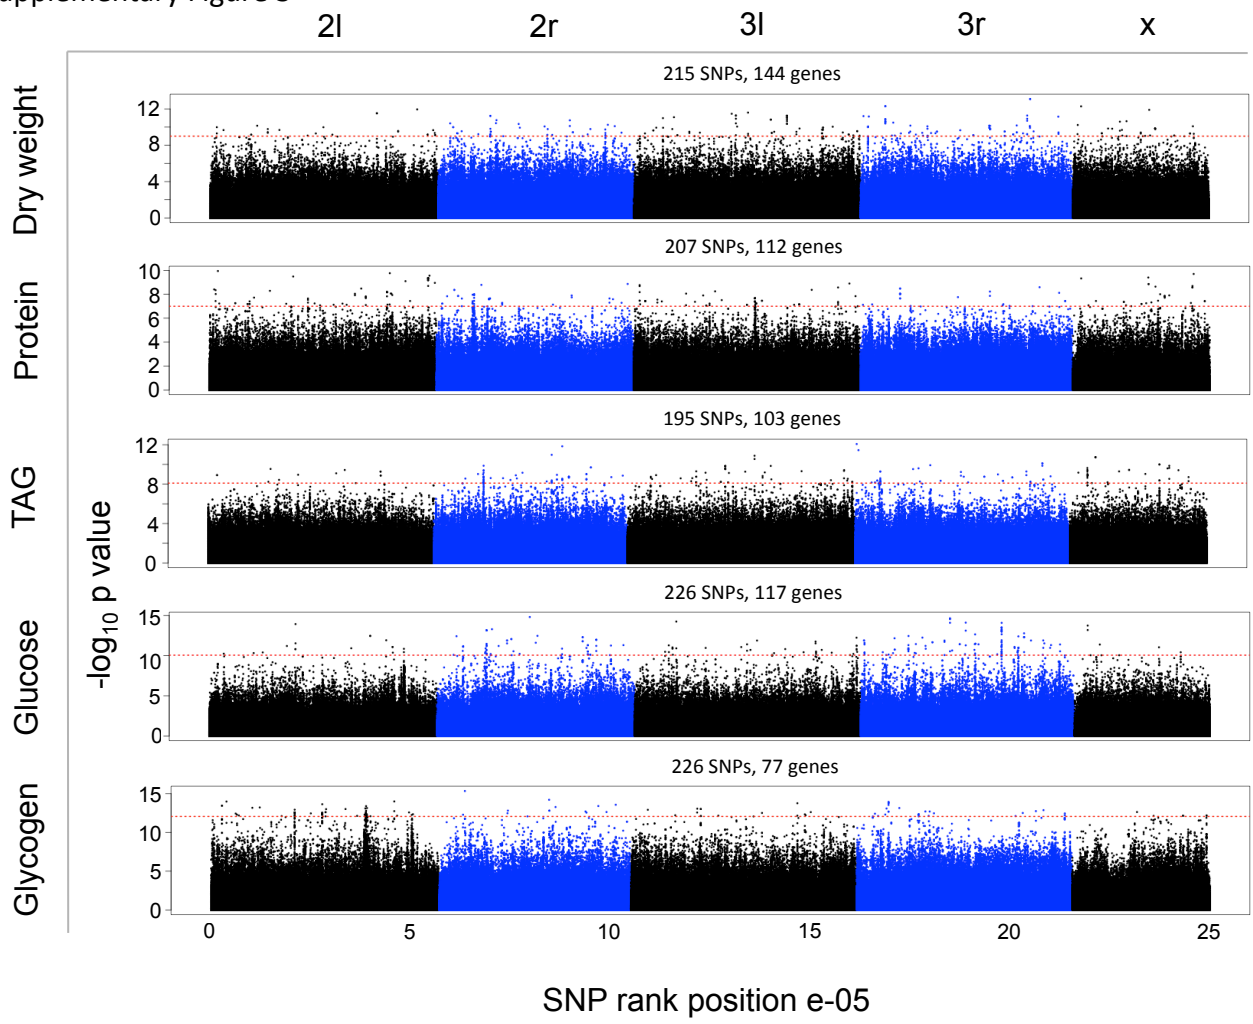

Supplementary Figure 3. Variation in microbiota-responsiveness of phenotypic traits maps to numerous SNPs throughout the *Drosophila* genome. Manhattan plots show  $-\log_{10}$  p-values of the interaction of biallelic SNP markers and microbiota treatment for each phenotypic trait.

## Supplementary Figure 4

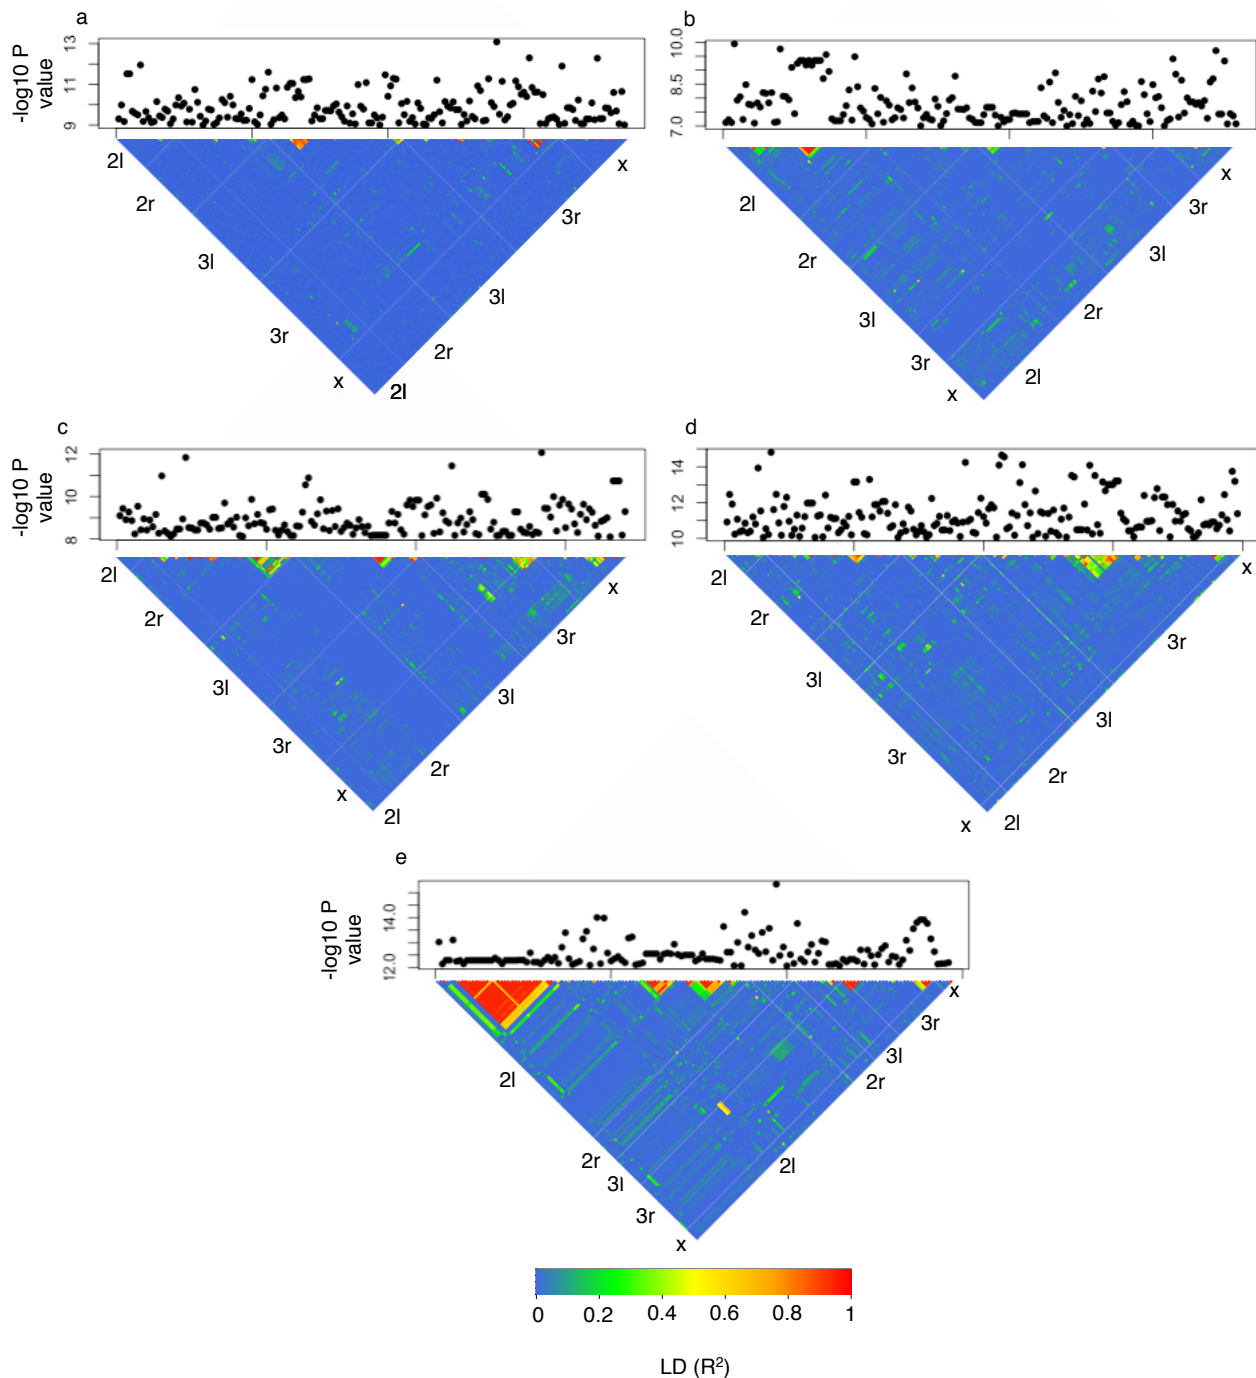

Supplementary Figure 4. Pairwise linkage disequilibrium (LD) among significant SNPs identified in GWAs. Pairwise LD was determined for all of the top 0.01% SNPs in GWAs for (a) dry weight; (b) protein; (c) TAG; (d) glucose content; (e) glycogen content. The distribution of SNPs (top panel); the heat map (bottom panel) is based on the LD measure  $R^2$  between SNPs, with the scale shown.

# Supplementary Figure 5a

## TAG

## Glucose

## Glycogen

CG4113

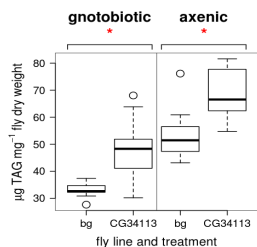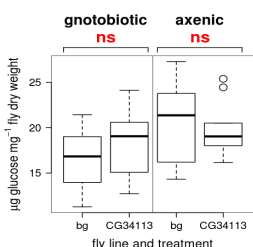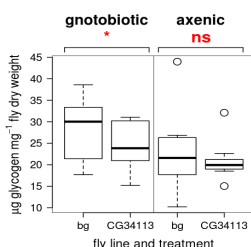

rg

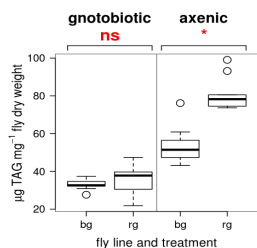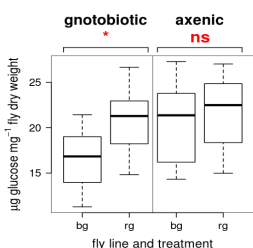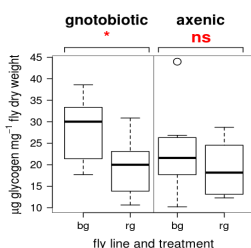

Ptp99A

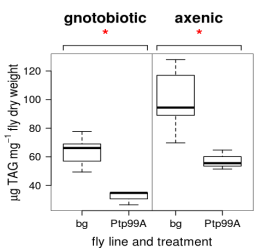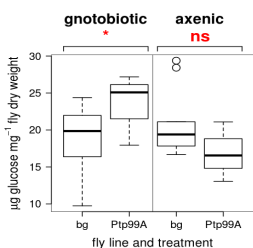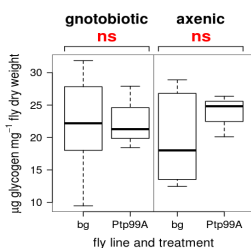

hiw

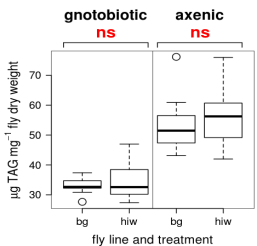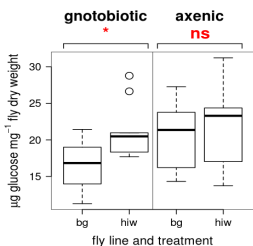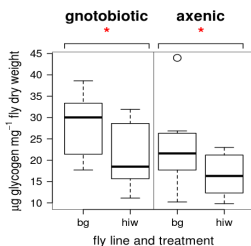

Dscam3

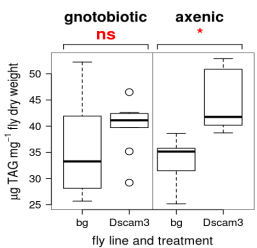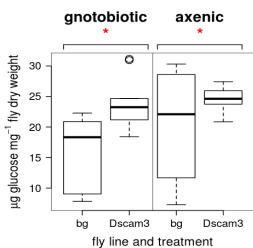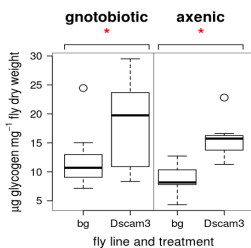

mthl1

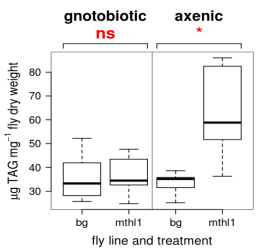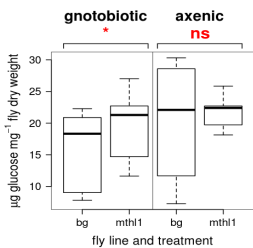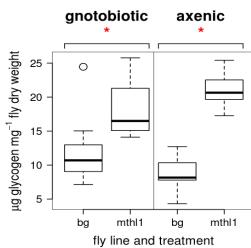

# Supplementary Figure 5b

## Glycogen

## TAG

## Glucose

CG1688

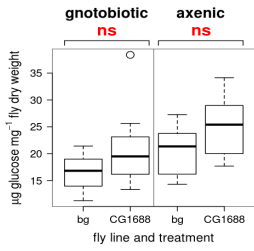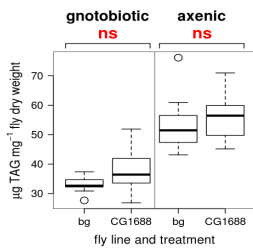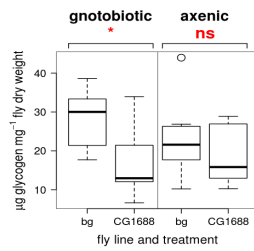

CG5565

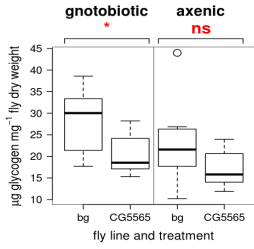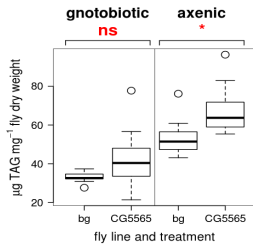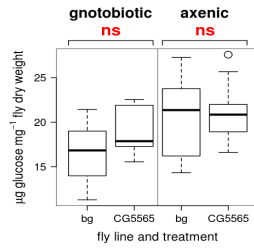

Fili

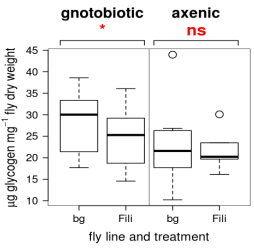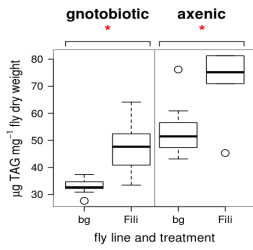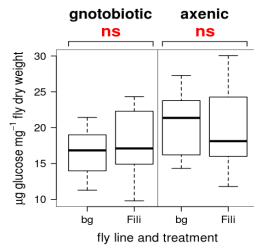

CG10019

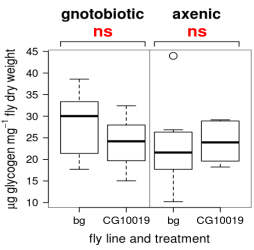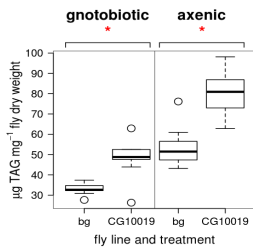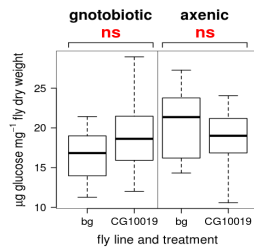

c(3)G

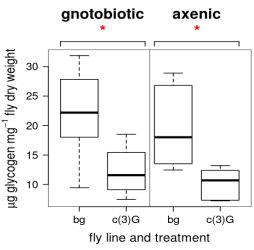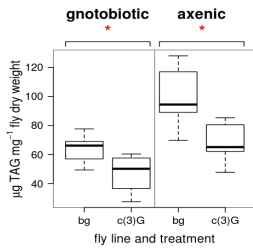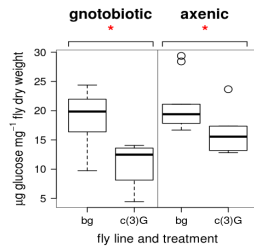

# Supplementary Figure 5c

## Glucose

## TAG

## Glycogen

CG7705

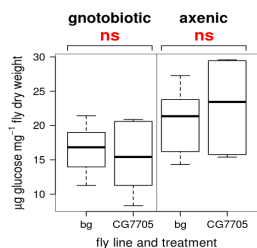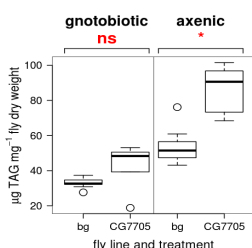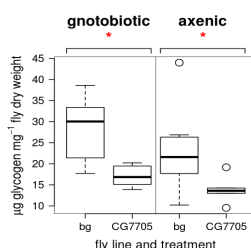

CG32264

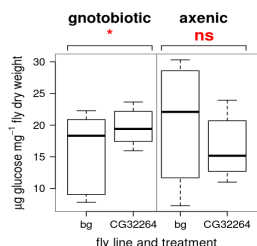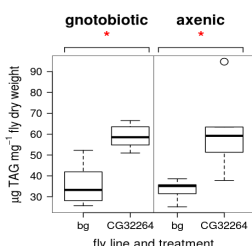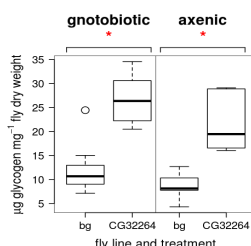

CG30288

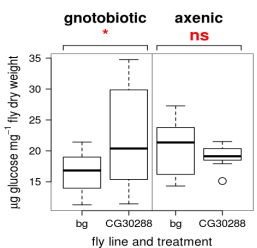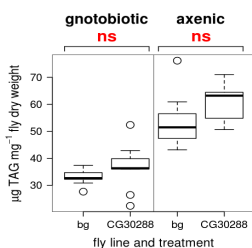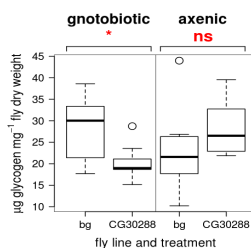

ird5

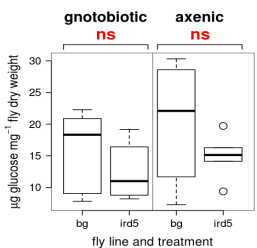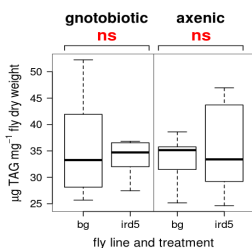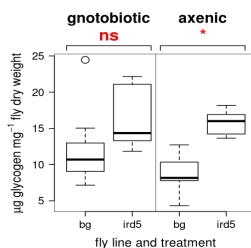

Supplementary Figure 5 . Effect of gene mutations on response of *Drosophila* to microbiota treatments. Candidate genes identified by the GWA study were tested for (a) TAG, (b) glycogen content and (c) glucose content. Differences between the mutant and background (bg) stocks between axenic and gnotobiotic flies were tested by a linear mixed model with critical probability below 0.025 (\*, N=9, ns=no significant difference) to correct for two comparisons. A microbiota effect was accepted where there was a significant difference between the mutant and a background fly stock in only one microbial condition. ns denotes absence of a significant difference. To avoid confounding *Wolbachia* effects, background stocks and mutant stocks were matched for *Wolbachia*-status.



# Supplementary Figure 6

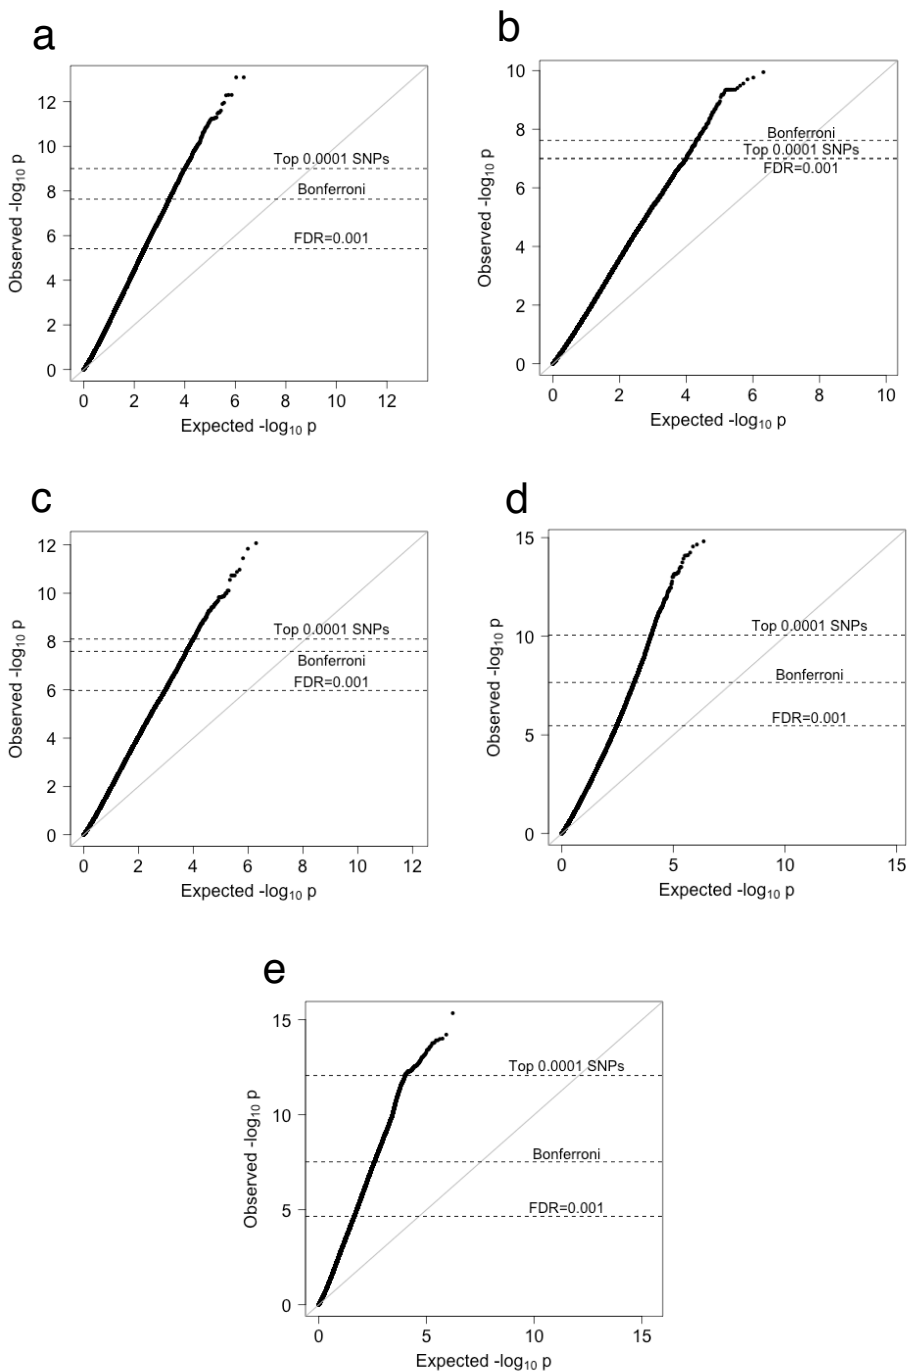

Supplementary Figure 6. Quantile-quantile plots of genome-wide p-values ( $-\log_{10}$ ). P-values for all traits were inflated: observed p-values are inflated above null expectation for all traits. Horizontal dashed lines represent critical thresholds determined by 0.001% False Discovery Rate, Bonferroni correction, and the top 0.0001 proportion of SNPs (used in this study). Top 0.0001 proportion SNPs is the most conservative criterion for all traits under study except protein ( $-\log_{10}$  False Discovery Rate for protein=6.997, Bonferroni critical threshold=7.62, top 0.0001 proportion=7.000).

## Supplementary Figure 7

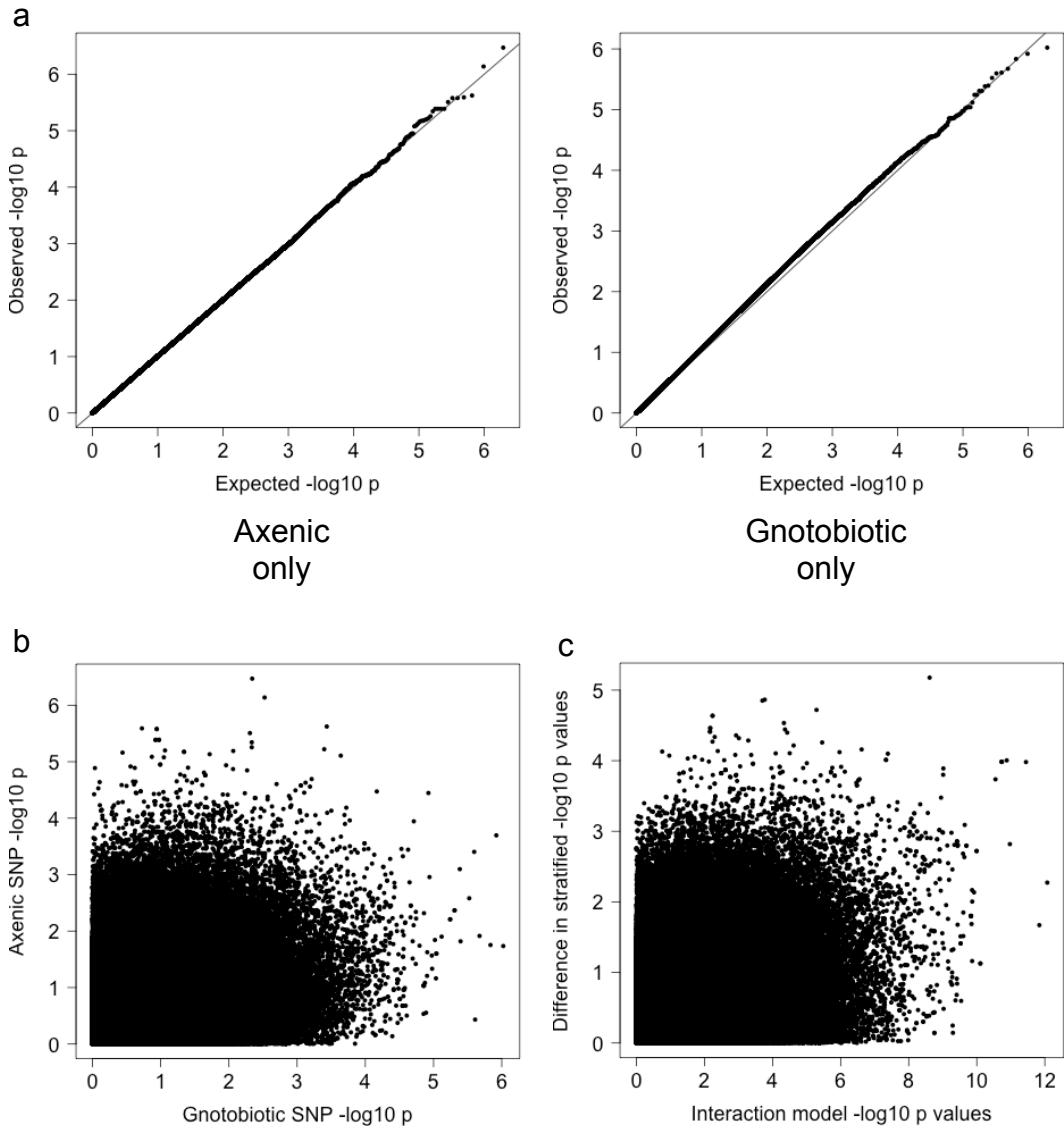

Supplementary Figure 7. Comparison of p-values ( $-\log_{10}$ ) from genome-wide association and effects of SNP in genome-wide treatment-stratified analysis. Example based on TAG mapping. P-values of SNP\*microbiota interaction were inflated (Supplementary Figure 5), but p-values for each SNP are not inflated when axenic and gnotobiotic samples were mapped separately in a treatment-stratified analysis (a). Treatment-stratified analysis can identify SNPs with treatment-specific effects (b), and some SNPs are identified by both modeling approaches (c). Both stratified and interaction-based analyses suggest some shared SNPs ( $r=0.32$ ,  $p<2.2e-16$ ), including SNPs in the gene *Rugose*, which was validated by mutant analysis (see Supplementary Note, Fig. 2, Table 1)

## Supplementary Tables 1-7

### Supplementary Table 1 Statistical analysis of phenotypic traits

Two approaches were adopted to model the data prior to GWA. The first approach (a) and (b) is statistically the most correct, but interpretation is difficult and power is low, particularly when considering the additional interaction of genetic polymorphisms by GWA. In this approach, an interaction of microbiota and *Wolbachia* status was fit as a fixed effect for dry weight, and a three-way interaction of dry weight, microbiota and *Wolbachia* status was fit as a fixed effect for the other traits. (These interactions were fitted because some traits showed relations to these predictors whilst others did not, and we wished to fit equivalent models to all traits.) For all models, genotype was nested in experimental block as a random effect. Full models are presented in (a). These models were simplified by stepwise removal of non-significant higher interactions, and the minimal models produced are presented in Table S1B. In the second approach (c), simpler models were fitted, in which microbiota, weight and *Wolbachia* status were additive, with genotype nested in experimental block as a random effect. The statistical analysis presented in Fig. 1b uses these models simplified by removal of non-significant factors.

#### (a) Full statistical models (all higher interactions)

|          | Term                     | DF    | F      | P       | % variance explained* |
|----------|--------------------------|-------|--------|---------|-----------------------|
| Glucose  | Microbiota               | 1,422 | 67.82  | <0.0001 |                       |
|          | Wolbachia                | 1,101 | 0.74   | 0.39    |                       |
|          | Weight                   | 1,422 | 12.62  | <0.001  |                       |
|          | Microbiota * Wolbachia   | 1,422 | 0.76   | 0.38    |                       |
|          | Microbiota * weight      | 1,422 | 4.74   | 0.03    |                       |
|          | Wolbachia * weight       | 1,422 | 10.33  | <0.002  |                       |
|          | Microbiota * Wolbachia * | 1,422 | 0      | 0.9     |                       |
|          | Weight                   |       |        |         |                       |
|          | Genotype                 |       |        |         | 31.16                 |
| Glycogen | Microbiota               | 1,246 | 11.76  | 0.0007  |                       |
|          | Wolbachia                | 1,69  | 6.83   | 0.01    |                       |
|          | Weight                   | 1,246 | 102.44 | <0.0001 |                       |
|          | Microbiota * Wolbachia   | 1,246 | 6.22   | 0.01    |                       |
|          | Microbiota * weight      | 1,246 | 1.82   | 0.18    |                       |
|          | Wolbachia * weight       | 1,246 | 2.91   | 0.09    |                       |
|          | Microbiota * Wolbachia * | 1,246 | 1.10   | 0.3     |                       |
|          | Weight                   |       |        |         |                       |
|          | Genotype                 |       |        |         | 53.85                 |
| Weight   | Microbiota               | 1,423 | 90.03  | <0.0001 |                       |
|          | Wolbachia                | 1,102 | 0.01   | 0.92    |                       |
|          | Microbiota * Wolbachia   | 1,423 | 0.006  | 0.94    |                       |
|          | Genotype                 |       |        |         |                       |
| TAG      | Microbiota               | 1,371 | 229.94 | <0.0001 |                       |
|          | Wolbachia                | 1,101 | 0      | 0.98    |                       |

|         |                          |       |       |        |       |
|---------|--------------------------|-------|-------|--------|-------|
|         | Weight                   | 1,371 | 8.81  | <0.005 |       |
|         | Microbiota * Wolbachia   | 1,371 | 0.01  | 0.92   |       |
|         | Microbiota * weight      | 1,371 | 0.18  | 0.67   |       |
|         | Wolbachia * weight       | 1,371 | 0.72  | 0.40   |       |
|         | Microbiota * Wolbachia * | 1,371 | 1.71  | 0.19   |       |
|         | Weight                   |       |       |        |       |
|         | Genotype                 |       |       |        | 71.05 |
| Protein | Microbiota               | 1,406 | 13.63 | 0.0003 |       |
|         | Wolbachia                | 1,106 | 1.32  | 0.25   |       |
|         | Weight                   | 1,406 | 9.44  | 0.002  |       |
|         | Microbiota * Wolbachia   | 1,406 | 0.30  | 0.6    |       |
|         | Microbiota * weight      | 1,406 | 5.57  | 0.02   |       |
|         | Wolbachia * weight       | 1,406 | 2.31  | 0.1    |       |
|         | Microbiota * Wolbachia * | 1,406 | 1.13  | 0.3    |       |
|         | Weight                   |       |       |        |       |
|         | Genotype                 |       |       |        | 72.41 |

(b) Minimal models from simplification of higher-level interactive models

| Trait    | Df    | Effect              | F      | P       | % variance explained* |
|----------|-------|---------------------|--------|---------|-----------------------|
| Glucose  | 1,422 | Microbiota          | 67.98  | <0.0001 |                       |
|          | 1,101 | Wolbachia           | 0.75   | 0.39    |                       |
|          | 1,422 | Weight              | 12.67  | <0.0005 |                       |
|          | 1,422 | Microbiota * weight | 4.75   | <0.03   |                       |
|          | 1,422 | Wolbachia * weight  | 10.35  | <0.005  |                       |
|          | 1,422 | Genotype            |        |         |                       |
| Glycogen | 1,250 | Weight              | 104.91 | <0.0001 |                       |
|          | 1,250 | Microbiota          | 11.32  | 0.0009  |                       |
|          | 1,69  | Wolbachia           | 7.25   | 0.009   |                       |
|          |       | Genotype (random)   |        |         |                       |
| Weight   | 1,424 | Microbiota          | 90.27  | <0.0001 |                       |
|          |       | Genotype (random)   |        |         |                       |
| TAG      | 1,375 | Weight              | 8.69   | <0.005  |                       |
|          |       | Microbiota          | 231.46 | <0.0001 |                       |
|          |       | Genotype (random)   |        |         |                       |
| Protein  | 1,409 | Microbiota          | 13.68  | 0.0002  |                       |
|          | 1,409 | Weight              | 9.20   | 0.003   |                       |
|          | 1,409 | Weight * Microbiota | 5.53   | 0.02    |                       |
|          |       | Genotype (random)   |        |         |                       |

(c) Reduced trait models

| Trait   | Df    | Effect     | F     | P       | % variance explained* |
|---------|-------|------------|-------|---------|-----------------------|
| Glucose | 1,426 | Microbiota | 66.34 | <0.0001 |                       |

|          |       |            |        |         |       |
|----------|-------|------------|--------|---------|-------|
|          | 1,101 | Wolbachia  | 0.71   | 0.4     |       |
|          | 1,426 | Weight     | 12.10  | 0.0006  |       |
|          |       | Genotype   |        |         | 30.75 |
| Glycogen | 1,250 | Microbiota | 11.32  | 0.0009  |       |
|          | 1,69  | Wolbachia  | 7.34   | 0.009   |       |
|          | 1,250 | Weight     | 104.91 | <0.0001 |       |
|          |       | Genotype   |        |         | 49.77 |
| Weight   | 1,424 | Microbiota | 90.24  | <0.0001 |       |
|          | 1,102 | Wolbachia  | 0.01   | 0.9     |       |
|          |       | Genotype   |        |         | 77.47 |
| TAG      | 1,375 | Microbiota | 231.31 | <0.0001 |       |
|          | 1,101 | Wolbachia  | 0      | 0.98    |       |
|          | 1,375 | Weight     | 8.56   | <0.005  |       |
|          |       | Genotype   |        |         | 71.63 |
| Protein  | 1,410 | Microbiota | 13.59  | 0.0003  |       |
|          | 1,102 | Wolbachia  | 1.41   | 0.2     |       |
|          | 1,410 | Weight     | 9.39   | 0.24    |       |
|          |       | Genotype   |        |         | 59.41 |

\* square of line (random effect) standard deviation

**Supplementary Table 2 Pairwise correlations among phenotypic traits in gnotobiotic and axenic flies.**

Correlations less significant than Bonferroni critical threshold ( $p < 0.008$ ) for six tests. Significant correlations are indicated in bold.

|                                  |                    | Correlation coefficient (Pearson's r) and p value |                                    |                    |                    |                    |                    |
|----------------------------------|--------------------|---------------------------------------------------|------------------------------------|--------------------|--------------------|--------------------|--------------------|
|                                  |                    | Gnotobiotic flies                                 |                                    |                    | Axenic flies       |                    |                    |
|                                  | Trait <sup>1</sup> | Glycogen                                          | TAG                                | Protein            | Glycogen           | TAG                | Protein            |
| <i>Wolbachia</i> -positive flies | Glucose            | 0.356,<br>p=0.013                                 | <b>0.625,</b><br><b>p&lt;0.001</b> | 0.003,<br>p=0.981  | -0.119,<br>p=0.448 | 0.047,<br>p=0.753  | -0.010,<br>p=0.943 |
|                                  | Glycogen           |                                                   | <b>0.411,</b><br><b>p=0.006</b>    | -0.150,<br>p=0.316 |                    | 0.328,<br>p=0.048  | 0.189,<br>p=0.231  |
|                                  | TAG                |                                                   |                                    | 0.196,<br>p=0.155  |                    |                    | 0.141,<br>p=0.366  |
| <i>Wolbachia</i> -negative flies | Glucose            | 0.174,<br>p=0.241                                 | 0.016,<br>p=0.910                  | -0.201,<br>p=0.137 | 0.260,<br>p=0.074  | -0.065,<br>p=0.637 | 0.131,<br>p=0.310  |
|                                  | Glycogen           |                                                   | 0.346,<br>p=0.017                  | -0.256,<br>p=0.094 |                    | 0.289,<br>p=0.052  | 0.324,<br>p=0.022  |
|                                  | TAG                |                                                   |                                    | 0.317,<br>p=0.026  |                    |                    | 0.283,<br>p=0.033  |

<sup>1</sup> Nutritional traits expressed as  $\mu\text{g}$  per  $\text{mg}$  dry weight.

**Supplementary Table 3a.** SNPs significantly associated with dry weight.

| Position<br>(Chromosome arm,<br>base) | Gene<br>symbol | FlyBase ID  | Site class                                        | Bases<br>from<br>gene | p-value<br>(-log10) |
|---------------------------------------|----------------|-------------|---------------------------------------------------|-----------------------|---------------------|
| chr <sub>m</sub> _2l_1185490          | Tgt            | FBgn0031321 | SYNONYMOUS_CODING                                 | NA                    | 9.95                |
| chr <sub>m</sub> _2l_16084738         | beat-Ia        | FBgn0013433 | DOWNSTREAM                                        | 3050                  | 9.76                |
| chr <sub>m</sub> _x_19685987          |                |             | SNP is more than 5000 bp away<br>from known genes | NA                    | 9.70                |
| chr <sub>m</sub> _2l_20953314         |                |             | SNP is more than 5000 bp away<br>from known genes | NA                    | 9.56                |
| chr <sub>m</sub> _2l_7429548          | CG5261         | FBgn0031912 | INTRON                                            | NA                    | 9.49                |
| chr <sub>m</sub> _x_12965665          | CG42629        | FBgn0261388 | INTRON                                            | NA                    | 9.41                |
| chr <sub>m</sub> _2l_20795209         | vari           | FBgn0250785 | INTRON                                            | NA                    | 9.35                |
| chr <sub>m</sub> _2l_20797248         | CG9328         | FBgn0032886 | UPSTREAM                                          | 469                   | 9.35                |
| chr <sub>m</sub> _2l_20797248         | vari           | FBgn0250785 | UPSTREAM                                          | 208                   | 9.35                |
| chr <sub>m</sub> _2l_20798645         | CG9328         | FBgn0032886 | INTRON                                            | NA                    | 9.35                |
| chr <sub>m</sub> _2l_20800885         | CG9328         | FBgn0032886 | INTRON                                            | NA                    | 9.35                |
| chr <sub>m</sub> _2l_20802914         | CG9328         | FBgn0032886 | INTRON                                            | NA                    | 9.35                |
| chr <sub>m</sub> _2l_20803879         | CG9328         | FBgn0032886 | INTRON                                            | NA                    | 9.35                |
| chr <sub>m</sub> _x_2423941           | trol           | FBgn0261451 | INTRON                                            | NA                    | 9.33                |
| chr <sub>m</sub> _2l_20792942         | vari           | FBgn0250785 | INTRON                                            | NA                    | 9.24                |
| chr <sub>m</sub> _2l_20797373         | vari           | FBgn0250785 | UPSTREAM                                          | 333                   | 9.18                |
| chr <sub>m</sub> _2l_20797373         | CG9328         | FBgn0032886 | UPSTREAM                                          | 344                   | 9.18                |
| chr <sub>m</sub> _2l_20799189         | CG9328         | FBgn0032886 | INTRON                                            | NA                    | 9.17                |
| chr <sub>m</sub> _2l_17783645         | CadN2          | FBgn0262018 | DOWNSTREAM                                        | 3633                  | 9.10                |
| chr <sub>m</sub> _2l_22327628         | CG17018        | FBgn0039972 | INTRON                                            | NA                    | 8.95                |
| chr <sub>m</sub> _3l_20360659         | in             | FBgn0001259 | NON_SYNONYMOUS_CODING                             | NA                    | 8.90                |
| chr <sub>m</sub> _2r_20115159         | CG30419        | FBgn0050419 | INTRON                                            | NA                    | 8.86                |
| chr <sub>m</sub> _x_13007135          | CG42237        | FBgn0250862 | UPSTREAM                                          | 2035                  | 8.85                |
| chr <sub>m</sub> _x_13007135          | CG43313        | FBgn0263005 | UPSTREAM                                          | 660                   | 8.85                |
| chr <sub>m</sub> _2r_7328465          | CG7777         | FBgn0033635 | INTRON                                            | NA                    | 8.79                |
| chr <sub>m</sub> _3l_829321           | CG13900        | FBgn0035162 | SYNONYMOUS_CODING                                 | NA                    | 8.77                |
| chr <sub>m</sub> _2l_20804507         | CG9328         | FBgn0032886 | INTRON                                            | NA                    | 8.70                |
| chr <sub>m</sub> _x_19500414          | CG14207        | FBgn0031037 | INTRON                                            | NA                    | 8.69                |
| chr <sub>m</sub> _3l_829204           | CG13900        | FBgn0035162 | SYNONYMOUS_CODING                                 | NA                    | 8.68                |
| chr <sub>m</sub> _x_14071021          | CG11581        | FBgn0030540 | SYNONYMOUS_CODING                                 | NA                    | 8.64                |
| chr <sub>m</sub> _3r_24599729         |                |             | SNP is more than 5000 bp away<br>from known genes | NA                    | 8.59                |
| chr <sub>m</sub> _x_19497297          | CG14220        | FBgn0031036 | UPSTREAM                                          | 1414                  | 8.58                |
| chr <sub>m</sub> _x_19497297          | CG14207        | FBgn0031037 | UPSTREAM                                          | 1894                  | 8.58                |
| chr <sub>m</sub> _3l_18488333         | AICR2          | FBgn0036789 | INTRON                                            | NA                    | 8.57                |
| chr <sub>m</sub> _3r_9161426          | CG8784         | FBgn0038140 | UPSTREAM                                          | 4259                  | 8.48                |
| chr <sub>m</sub> _3r_9161426          | CG8795         | FBgn0038139 | UPSTREAM                                          | 1541                  | 8.48                |
| chr <sub>m</sub> _2l_13104688         | CG5142         | FBgn0032470 | UPSTREAM                                          | 2183                  | 8.48                |

|                  |            |             |                                                |      |      |
|------------------|------------|-------------|------------------------------------------------|------|------|
| chrM_2l_863637   | aru        | FBgn0029095 | SYNONYMOUS_CODING                              | NA   | 8.41 |
| chrM_3l_15654441 | Eig71Ek    | FBgn0014851 | INTRON                                         | NA   | 8.37 |
| chrM_2r_4114655  | LRP1       | FBgn0053087 | DOWNSTREAM                                     | 712  | 8.36 |
| chrM_2r_4114655  | CG34217    | FBgn0085246 | DOWNSTREAM                                     | 840  | 8.36 |
| chrM_2l_970579   |            |             | SNP is more than 5000 bp away from known genes | NA   | 8.35 |
| chrM_2l_5505633  |            |             | SNP is more than 5000 bp away from known genes | NA   | 8.29 |
| chrM_3l_7321096  | CG8602     | FBgn0035763 | SYNONYMOUS_CODING                              | NA   | 8.25 |
| chrM_3r_18966517 | hh         | FBgn0004644 | INTRON                                         | NA   | 8.23 |
| chrM_2l_15766186 | CG3793     | FBgn0028507 | UTR_3_PRIME                                    | NA   | 8.19 |
| chrM_2l_15766186 | wek        | FBgn0001990 | UTR_3_PRIME                                    | NA   | 8.19 |
| chrM_2l_15766316 | wek        | FBgn0001990 | UTR_3_PRIME                                    | NA   | 8.19 |
| chrM_3l_829318   | CG13900    | FBgn0035162 | SYNONYMOUS_CODING                              | NA   | 8.18 |
| chrM_2l_15766217 | CG3793     | FBgn0028507 | UTR_3_PRIME                                    | NA   | 8.17 |
| chrM_2l_15766217 | wek        | FBgn0001990 | UTR_3_PRIME                                    | NA   | 8.17 |
| chrM_3r_26256962 | CG15533    | FBgn0039768 | NON_SYNONYMOUS_CODING                          | NA   | 8.12 |
| chrM_2l_16194853 | Ca-alpha1D | FBgn0001991 | DOWNSTREAM                                     | 4774 | 8.07 |
| chrM_3l_4630926  | axo        | FBgn0262870 | INTRON                                         | NA   | 8.06 |
| chrM_3r_9161779  | CG8784     | FBgn0038140 | UPSTREAM                                       | 3906 | 8.06 |
| chrM_3r_9161779  | CG8795     | FBgn0038139 | UPSTREAM                                       | 1894 | 8.06 |
| chrM_2l_16258204 | EndoGI     | FBgn0028515 | INTRON                                         | NA   | 8.05 |
| chrM_2l_12468829 | bun        | FBgn0259176 | INTRON                                         | NA   | 8.05 |
| chrM_2l_976907   |            |             | SNP is more than 5000 bp away from known genes | NA   | 8.02 |
| chrM_2r_6734164  | CG30015    | FBgn0050015 | INTRON                                         | NA   | 8.02 |
| chrM_3r_9161655  | CG8784     | FBgn0038140 | UPSTREAM                                       | 4030 | 8.01 |
| chrM_3r_9161655  | CG8795     | FBgn0038139 | UPSTREAM                                       | 1770 | 8.01 |
| chrM_x_14709844  | rut        | FBgn0003301 | INTRON                                         | NA   | 8.01 |
| chrM_2r_6578432  | stan       | FBgn0024836 | INTRON                                         | NA   | 7.96 |
| chrM_2l_16362492 | jhamt      | FBgn0028841 | UPSTREAM                                       | 3427 | 7.94 |
| chrM_2r_6734151  | CG30015    | FBgn0050015 | INTRON                                         | NA   | 7.93 |
| chrM_2l_12468777 | bun        | FBgn0259176 | INTRON                                         | NA   | 7.92 |
| chrM_x_16074471  |            |             | SNP is more than 5000 bp away from known genes | NA   | 7.91 |
| chrM_3l_6254829  | ImpL3      | FBgn0001258 | INTRON                                         | NA   | 7.90 |
| chrM_2r_15450499 | sm         | FBgn0003435 | INTRON                                         | NA   | 7.90 |
| chrM_3r_18966534 | hh         | FBgn0004644 | INTRON                                         | NA   | 7.87 |
| chrM_x_15275362  | CG9164     | FBgn0030634 | UTR_3_PRIME                                    | NA   | 7.86 |
| chrM_x_15275367  | CG9164     | FBgn0030634 | UTR_3_PRIME                                    | NA   | 7.86 |
| chrM_2r_4681981  | sns        | FBgn0024189 | UPSTREAM                                       | 4041 | 7.86 |
| chrM_2r_4681981  | CG8746     | FBgn0033330 | DOWNSTREAM                                     | 699  | 7.86 |
| chrM_3l_22163688 | olf413     | FBgn0037153 | INTRON                                         | NA   | 7.84 |
| chrM_2r_2796520  | CG30158    | FBgn0050158 | INTRON                                         | NA   | 7.84 |



|                |         |             |                                                |      |      |
|----------------|---------|-------------|------------------------------------------------|------|------|
| chrX_15275732  | CG9164  | FBgn0030634 | INTRON                                         | NA   | 7.83 |
| chr2L_15766306 | wek     | FBgn0001990 | UTR_3_PRIME                                    | NA   | 7.83 |
| chr2L_13608642 | kuz     | FBgn0259984 | INTRON                                         | NA   | 7.82 |
| chr2L_13608590 | kuz     | FBgn0259984 | INTRON                                         | NA   | 7.78 |
| chrX_15275419  | CG9164  | FBgn0030634 | SYNONYMOUS_CODING                              | NA   | 7.78 |
| chr3R_15320159 | Dys     | FBgn0260003 | INTRON                                         | NA   | 7.76 |
| chr2L_13608604 | kuz     | FBgn0259984 | INTRON                                         | NA   | 7.75 |
| chr2R_15460277 | sm      | FBgn0003435 | INTRON                                         | NA   | 7.74 |
| chr2L_4051281  | ed      | FBgn0000547 | INTRON                                         | NA   | 7.72 |
| chrX_15276037  | CG9164  | FBgn0030634 | SYNONYMOUS_CODING                              | NA   | 7.71 |
| chr2R_6728017  | CG30015 | FBgn0050015 | SYNONYMOUS_CODING                              | NA   | 7.70 |
| chr2L_13608651 | kuz     | FBgn0259984 | INTRON                                         | NA   | 7.68 |
| chr3L_10615226 | CG43127 | FBgn0262592 | DOWNSTREAM                                     | 2602 | 7.67 |
| chr3L_10615226 | CG42521 | FBgn0260396 | DOWNSTREAM                                     | 940  | 7.67 |
| chr3L_10615235 | CG43127 | FBgn0262592 | DOWNSTREAM                                     | 2593 | 7.67 |
| chr3L_10615235 | CG42521 | FBgn0260396 | DOWNSTREAM                                     | 931  | 7.67 |
| chr3L_10615239 | CG43127 | FBgn0262592 | DOWNSTREAM                                     | 2589 | 7.67 |
| chr3L_10615239 | CG42521 | FBgn0260396 | DOWNSTREAM                                     | 927  | 7.67 |
| chr3R_9162157  | CG8784  | FBgn0038140 | UPSTREAM                                       | 3528 | 7.65 |
| chr3R_9162157  | CG8795  | FBgn0038139 | UPSTREAM                                       | 2272 | 7.65 |
| chr2R_18510065 | CG33143 | FBgn0053143 | INTRON                                         | NA   | 7.65 |
| chr2R_8238733  | ana3    | FBgn0033718 | DOWNSTREAM                                     | 150  | 7.65 |
| chr2R_8238733  | CG30047 | FBgn0050047 | UPSTREAM                                       | 565  | 7.65 |
| chr2L_8638991  | Sema-1a | FBgn0011259 | INTRON                                         | NA   | 7.65 |
| chr2R_5298432  | wun     | FBgn0016078 | INTRON                                         | NA   | 7.64 |
| chr2R_8130048  | CG43316 | FBgn0263021 | UPSTREAM                                       | 3    | 7.61 |
| chr2R_8130048  | CG43315 | FBgn0263020 | DOWNSTREAM                                     | 784  | 7.61 |
| chr2R_8133105  | CG43316 | FBgn0263021 | DOWNSTREAM                                     | 2327 | 7.60 |
| chr2R_8133105  | CG43244 | FBgn0262889 | UPSTREAM                                       | 938  | 7.60 |
| chr2R_8133171  | CG43244 | FBgn0262889 | UPSTREAM                                       | 1004 | 7.59 |
| chr2R_8133171  | CG43316 | FBgn0263021 | DOWNSTREAM                                     | 2393 | 7.59 |
| chr2R_18785975 | nahoda  | FBgn0034797 | INTRON                                         | NA   | 7.59 |
| chr3L_2220998  |         |             | SNP is more than 5000 bp away from known genes | NA   | 7.55 |
| chr2L_8639036  | Sema-1a | FBgn0011259 | INTRON                                         | NA   | 7.53 |
| chr3L_7849597  | Pdp1    | FBgn0016694 | INTRON                                         | NA   | 7.51 |
| chr3L_11101797 | CG12522 | FBgn0036131 | UTR_3_PRIME                                    | NA   | 7.47 |
| chr3L_829351   | CG13900 | FBgn0035162 | SYNONYMOUS_CODING                              | NA   | 7.47 |
| chr3L_829360   | CG13900 | FBgn0035162 | SYNONYMOUS_CODING                              | NA   | 7.47 |
| chrX_14404284  |         |             | SNP is more than 5000 bp away from known genes | NA   | 7.46 |
| chr3L_11101725 | CG12522 | FBgn0036131 | NON_SYNONYMOUS_CODING                          | NA   | 7.45 |
| chr2R_6730132  | CG30015 | FBgn0050015 | SYNONYMOUS_CODING                              | NA   | 7.44 |
| chrX_4618689   | Proc-R  | FBgn0029723 | INTRON                                         | NA   | 7.44 |
| chr2L_18381797 | Fas3    | FBgn0000636 | INTRON                                         | NA   | 7.44 |

|                |         |             |                                                |      |      |
|----------------|---------|-------------|------------------------------------------------|------|------|
| chr3r_26729403 | Cyp4c3  | FBgn0015032 | DOWNSTREAM                                     | 2993 | 7.43 |
| chr3r_26729403 | CG33483 | FBgn0053483 | UPSTREAM                                       | 1520 | 7.43 |
| chr2l_970899   |         |             | SNP is more than 5000 bp away from known genes | NA   | 7.43 |
| chr3l_1277218  | CG32333 | FBgn0052333 | INTRON                                         | NA   | 7.43 |
| chr3l_1277225  | CG32333 | FBgn0052333 | INTRON                                         | NA   | 7.43 |
| chr3l_1277226  | CG32333 | FBgn0052333 | INTRON                                         | NA   | 7.43 |
| chr3l_1277227  | CG32333 | FBgn0052333 | INTRON                                         | NA   | 7.43 |
| chrX_21315361  | CG42343 | FBgn0259245 | INTRON                                         | NA   | 7.43 |
| chrX_21315362  | CG42343 | FBgn0259245 | INTRON                                         | NA   | 7.43 |
| chr2r_6570464  | stan    | FBgn0024836 | INTRON                                         | NA   | 7.42 |
| chr2l_3711191  | cutlet  | FBgn0015376 | NON_SYNONYMOUS_CODING                          | NA   | 7.41 |
| chr3l_10614430 | CG43127 | FBgn0262592 | DOWNSTREAM                                     | 3398 | 7.40 |
| chr3l_10614430 | CG42521 | FBgn0260396 | DOWNSTREAM                                     | 1736 | 7.40 |
| chr3l_2574451  | msn     | FBgn0010909 | INTRON                                         | NA   | 7.40 |
| chr3l_10616787 | CG43127 | FBgn0262592 | DOWNSTREAM                                     | 1041 | 7.39 |
| chr3l_10616787 | CG42521 | FBgn0260396 | UPSTREAM                                       | 111  | 7.39 |
| chr3l_5479057  | CG4835  | FBgn0035607 | DOWNSTREAM                                     | 2294 | 7.37 |
| chr3l_18488284 | AICR2   | FBgn0036789 | INTRON                                         | NA   | 7.36 |
| chrX_8916007   | rdgA    | FBgn0261549 | INTRON                                         | NA   | 7.36 |
| chrX_8916007   | CR43836 | FBgn0264384 | INTRON                                         | NA   | 7.36 |
| chrX_13408215  | Neto    | FBgn0052635 | INTRON                                         | NA   | 7.32 |
| chr3l_10631766 | CG8009  | FBgn0036090 | SYNONYMOUS_CODING                              | NA   | 7.31 |
| chr3l_2220902  |         |             | SNP is more than 5000 bp away from known genes | NA   | 7.31 |
| chr2l_8639111  | Sema-1a | FBgn0011259 | INTRON                                         | NA   | 7.30 |
| chr2r_18509918 | CG33143 | FBgn0053143 | INTRON                                         | NA   | 7.30 |
| chr2r_6570419  | stan    | FBgn0024836 | INTRON                                         | NA   | 7.29 |
| chr2r_19462480 | apt     | FBgn0015903 | INTRON                                         | NA   | 7.29 |
| chr2r_9279637  | CG43691 | FBgn0263774 | NON_SYNONYMOUS_CODING                          | NA   | 7.28 |
| chrX_19293197  | kek5    | FBgn0031016 | INTRON                                         | NA   | 7.27 |
| chr3l_18488329 | AICR2   | FBgn0036789 | INTRON                                         | NA   | 7.27 |
| chr2l_2585503  | Drp1    | FBgn0026479 | UPSTREAM                                       | 55   | 7.25 |
| chr2l_2585503  | CG15394 | FBgn0250835 | UPSTREAM                                       | 3351 | 7.25 |
| chr2r_6570465  | stan    | FBgn0024836 | INTRON                                         | NA   | 7.25 |
| chrX_12656071  | CG12717 | FBgn0030420 | SYNONYMOUS_CODING                              | NA   | 7.25 |
| chr2l_9135470  | CG32982 | FBgn0052982 | INTRON                                         | NA   | 7.24 |
| chr2r_9279659  | CG43691 | FBgn0263774 | SYNONYMOUS_CODING                              | NA   | 7.24 |
| chr3l_10707096 |         |             | SNP is more than 5000 bp away from known genes | NA   | 7.23 |
| chr3l_10707097 |         |             | SNP is more than 5000 bp away from known genes | NA   | 7.23 |
| chr2l_1296034  | robo3   | FBgn0041097 | DOWNSTREAM                                     | 1347 | 7.23 |
| chr3l_6903932  | Prat2   | FBgn0041194 | DOWNSTREAM                                     | 1167 | 7.23 |
| chr2l_11397558 |         |             | SNP is more than 5000 bp away                  | NA   | 7.22 |

|                  |         |             |                                                   |      |      |
|------------------|---------|-------------|---------------------------------------------------|------|------|
|                  |         |             | from known genes                                  |      |      |
| chrn_2r_1563527  | scaf    | FBgn0033033 | DOWNSTREAM                                        | 727  | 7.22 |
| chrn_2r_1563527  | kune    | FBgn0033032 | DOWNSTREAM                                        | 3225 | 7.22 |
| chrn_2r_6575211  | stan    | FBgn0024836 | INTRON                                            | NA   | 7.22 |
| chrn_2l_6843244  | sens-2  | FBgn0051632 | DOWNSTREAM                                        | 4239 | 7.21 |
| chrn_x_12001735  | CR43960 | FBgn0264675 | INTRON                                            | NA   | 7.19 |
| chrn_x_12001735  | CG2750  | FBgn0030376 | INTRON                                            | NA   | 7.19 |
| chrn_2l_3711118  | cutlet  | FBgn0015376 | SYNONYMOUS_CODING                                 | NA   | 7.19 |
| chrn_2l_3711130  | cutlet  | FBgn0015376 | SYNONYMOUS_CODING                                 | NA   | 7.19 |
| chrn_2r_6729331  | CG30015 | FBgn0050015 | SYNONYMOUS_CODING                                 | NA   | 7.19 |
| chrn_2l_3575889  | CG43815 | FBgn0264363 | UPSTREAM                                          | 321  | 7.18 |
| chrn_2l_3575889  | CR43822 | FBgn0264370 | DOWNSTREAM                                        | 83   | 7.18 |
| chrn_3r_20665770 | CG13636 | FBgn0039232 | UTR_3_PRIME                                       | NA   | 7.17 |
| chrn_3l_855884   | dpr20   | FBgn0035170 | INTRON                                            | NA   | 7.16 |
| chrn_3l_14205832 | nuf     | FBgn0013718 | INTRON                                            | NA   | 7.16 |
| chrn_3l_14205829 | nuf     | FBgn0013718 | INTRON                                            | NA   | 7.16 |
| chrn_3l_14205831 | nuf     | FBgn0013718 | INTRON                                            | NA   | 7.16 |
| chrn_3r_3726146  | wtrw    | FBgn0260005 | SYNONYMOUS_CODING                                 | NA   | 7.15 |
| chrn_2l_16054783 | beat-1a | FBgn0013433 | INTRON                                            | NA   | 7.15 |
| chrn_3l_10632370 | CG8009  | FBgn0036090 | SYNONYMOUS_CODING                                 | NA   | 7.14 |
| chrn_2r_13812178 | elk     | FBgn0011589 | SYNONYMOUS_CODING                                 | NA   | 7.13 |
| chrn_2l_15805377 |         |             | SNP is more than 5000 bp away<br>from known genes | NA   | 7.13 |
| chrn_2r_9279672  | CG43691 | FBgn0263774 | NON_SYNONYMOUS_CODING                             | NA   | 7.12 |
| chrn_2l_10586312 | Trim9   | FBgn0051721 | INTRON                                            | NA   | 7.12 |
| chrn_2l_11770148 |         |             | SNP is more than 5000 bp away<br>from known genes | NA   | 7.12 |
| chrn_3l_13766739 | bru-3   | FBgn0264001 | INTRON                                            | NA   | 7.12 |
| chrn_3l_10004092 | dpr6    | FBgn0040823 | INTRON                                            | NA   | 7.12 |
| chrn_3l_10004108 | dpr6    | FBgn0040823 | INTRON                                            | NA   | 7.12 |
| chrn_3r_1270839  | CG14669 | FBgn0037326 | INTRON                                            | NA   | 7.12 |
| chrn_3l_18488341 | AlCR2   | FBgn0036789 | INTRON                                            | NA   | 7.12 |
| chrn_2l_13608629 | kuz     | FBgn0259984 | INTRON                                            | NA   | 7.10 |
| chrn_3l_6903985  | Prat2   | FBgn0041194 | DOWNSTREAM                                        | 1114 | 7.09 |
| chrn_3l_4621795  | CG32246 | FBgn0052246 | SYNONYMOUS_CODING                                 | NA   | 7.09 |
| chrn_x_9214582   | c12.2   | FBgn0040234 | INTRON                                            | NA   | 7.08 |
| chrn_2l_9513712  | CG33298 | FBgn0032120 | INTRON                                            | NA   | 7.08 |
| chrn_x_3538650   | AlstR   | FBgn0028961 | INTRON                                            | NA   | 7.07 |
| chrn_3r_20559590 | tok     | FBgn0004885 | INTRON                                            | NA   | 7.06 |
| chrn_3l_6574746  | jv      | FBgn0263973 | INTRON                                            | NA   | 7.05 |
| chrn_3l_6574746  | CG18769 | FBgn0042185 | INTRON                                            | NA   | 7.05 |
| chrn_3r_21380698 | msi     | FBgn0011666 | INTRON                                            | NA   | 7.03 |
| chrn_3r_10187030 | CG31320 | FBgn0051320 | UTR_5_PRIME                                       | NA   | 7.02 |
| chrn_2r_6729208  | CG30015 | FBgn0050015 | SYNONYMOUS_CODING                                 | NA   | 7.01 |
| chrn_3r_23781753 | CG5527  | FBgn0039564 | SYNONYMOUS_CODING                                 | NA   | 7.01 |

|                               |         |             |                   |    |      |
|-------------------------------|---------|-------------|-------------------|----|------|
| chr <sub>m</sub> _2r_5298746  | wun     | FBgn0016078 | INTRON            | NA | 7.00 |
| chr <sub>m</sub> _3l_10631736 | CG8009  | FBgn0036090 | SYNONYMOUS_CODING | NA | 7.00 |
| chr <sub>m</sub> _x_10073599  | CG43902 | FBgn0264503 | INTRON            | NA | 7.00 |
| chr <sub>m</sub> _3l_22916473 | CG12768 | FBgn0037206 | UTR_3_PRIME       | NA | 7.00 |

**Supplementary Table 3b.** SNPs significantly associated with protein.

| Position<br>(Chromosome arm,<br>base) | Gene<br>symbol | FlyBase ID  | Site class                                        | Bases<br>from<br>gene | p-value<br>(-log10) |
|---------------------------------------|----------------|-------------|---------------------------------------------------|-----------------------|---------------------|
| chrM_2L_1185490                       | Tgt            | FBgn0031321 | SYNONYMOUS_CODING                                 | NA                    | 9.95                |
| chrM_2L_16084738                      | beat-1a        | FBgn0013433 | DOWNSTREAM                                        | 3050                  | 9.76                |
| chrM_x_19685987                       |                |             | SNP is more than 5000 bp away<br>from known genes | NA                    | 9.70                |
| chrM_2L_20953314                      |                |             | SNP is more than 5000 bp away<br>from known genes | NA                    | 9.56                |
| chrM_2L_7429548                       | CG5261         | FBgn0031912 | INTRON                                            | NA                    | 9.49                |
| chrM_x_12965665                       | CG42629        | FBgn0261388 | INTRON                                            | NA                    | 9.41                |
| chrM_2L_20795209                      | vari           | FBgn0250785 | INTRON                                            | NA                    | 9.35                |
| chrM_2L_20797248                      | CG9328         | FBgn0032886 | UPSTREAM                                          | 469                   | 9.35                |
| chrM_2L_20797248                      | vari           | FBgn0250785 | UPSTREAM                                          | 208                   | 9.35                |
| chrM_2L_20798645                      | CG9328         | FBgn0032886 | INTRON                                            | NA                    | 9.35                |
| chrM_2L_20800885                      | CG9328         | FBgn0032886 | INTRON                                            | NA                    | 9.35                |
| chrM_2L_20802914                      | CG9328         | FBgn0032886 | INTRON                                            | NA                    | 9.35                |
| chrM_2L_20803879                      | CG9328         | FBgn0032886 | INTRON                                            | NA                    | 9.35                |
| chrM_x_2423941                        | trol           | FBgn0261451 | INTRON                                            | NA                    | 9.33                |
| chrM_2L_20792942                      | vari           | FBgn0250785 | INTRON                                            | NA                    | 9.24                |
| chrM_2L_20797373                      | vari           | FBgn0250785 | UPSTREAM                                          | 333                   | 9.18                |
| chrM_2L_20797373                      | CG9328         | FBgn0032886 | UPSTREAM                                          | 344                   | 9.18                |
| chrM_2L_20799189                      | CG9328         | FBgn0032886 | INTRON                                            | NA                    | 9.17                |
| chrM_2L_17783645                      | CadN2          | FBgn0262018 | DOWNSTREAM                                        | 3633                  | 9.10                |
| chrM_2L_22327628                      | CG17018        | FBgn0039972 | INTRON                                            | NA                    | 8.95                |
| chrM_3L_20360659                      | in             | FBgn0001259 | NON_SYNONYMOUS_CODING                             | NA                    | 8.90                |
| chrM_2R_20115159                      | CG30419        | FBgn0050419 | INTRON                                            | NA                    | 8.86                |
| chrM_x_13007135                       | CG42237        | FBgn0250862 | UPSTREAM                                          | 2035                  | 8.85                |
| chrM_x_13007135                       | CG43313        | FBgn0263005 | UPSTREAM                                          | 660                   | 8.85                |
| chrM_2R_7328465                       | CG7777         | FBgn0033635 | INTRON                                            | NA                    | 8.79                |
| chrM_3L_829321                        | CG13900        | FBgn0035162 | SYNONYMOUS_CODING                                 | NA                    | 8.77                |
| chrM_2L_20804507                      | CG9328         | FBgn0032886 | INTRON                                            | NA                    | 8.70                |
| chrM_x_19500414                       | CG14207        | FBgn0031037 | INTRON                                            | NA                    | 8.69                |
| chrM_3L_829204                        | CG13900        | FBgn0035162 | SYNONYMOUS_CODING                                 | NA                    | 8.68                |
| chrM_x_14071021                       | CG11581        | FBgn0030540 | SYNONYMOUS_CODING                                 | NA                    | 8.64                |
| chrM_3R_24599729                      |                |             | SNP is more than 5000 bp away<br>from known genes | NA                    | 8.59                |
| chrM_x_19497297                       | CG14220        | FBgn0031036 | UPSTREAM                                          | 1414                  | 8.58                |
| chrM_x_19497297                       | CG14207        | FBgn0031037 | UPSTREAM                                          | 1894                  | 8.58                |
| chrM_3L_18488333                      | AICR2          | FBgn0036789 | INTRON                                            | NA                    | 8.57                |
| chrM_3R_9161426                       | CG8784         | FBgn0038140 | UPSTREAM                                          | 4259                  | 8.48                |
| chrM_3R_9161426                       | CG8795         | FBgn0038139 | UPSTREAM                                          | 1541                  | 8.48                |
| chrM_2L_13104688                      | CG5142         | FBgn0032470 | UPSTREAM                                          | 2183                  | 8.48                |

|                  |            |             |                                                |      |      |
|------------------|------------|-------------|------------------------------------------------|------|------|
| chrM_2l_863637   | aru        | FBgn0029095 | SYNONYMOUS_CODING                              | NA   | 8.41 |
| chrM_3l_15654441 | Eig71Ek    | FBgn0014851 | INTRON                                         | NA   | 8.37 |
| chrM_2r_4114655  | LRP1       | FBgn0053087 | DOWNSTREAM                                     | 712  | 8.36 |
| chrM_2r_4114655  | CG34217    | FBgn0085246 | DOWNSTREAM                                     | 840  | 8.36 |
| chrM_2l_970579   |            |             | SNP is more than 5000 bp away from known genes | NA   | 8.35 |
| chrM_2l_5505633  |            |             | SNP is more than 5000 bp away from known genes | NA   | 8.29 |
| chrM_3l_7321096  | CG8602     | FBgn0035763 | SYNONYMOUS_CODING                              | NA   | 8.25 |
| chrM_3r_18966517 | hh         | FBgn0004644 | INTRON                                         | NA   | 8.23 |
| chrM_2l_15766186 | CG3793     | FBgn0028507 | UTR_3_PRIME                                    | NA   | 8.19 |
| chrM_2l_15766186 | wek        | FBgn0001990 | UTR_3_PRIME                                    | NA   | 8.19 |
| chrM_2l_15766316 | wek        | FBgn0001990 | UTR_3_PRIME                                    | NA   | 8.19 |
| chrM_3l_829318   | CG13900    | FBgn0035162 | SYNONYMOUS_CODING                              | NA   | 8.18 |
| chrM_2l_15766217 | CG3793     | FBgn0028507 | UTR_3_PRIME                                    | NA   | 8.17 |
| chrM_2l_15766217 | wek        | FBgn0001990 | UTR_3_PRIME                                    | NA   | 8.17 |
| chrM_3r_26256962 | CG15533    | FBgn0039768 | NON_SYNONYMOUS_CODING                          | NA   | 8.12 |
| chrM_2l_16194853 | Ca-alpha1D | FBgn0001991 | DOWNSTREAM                                     | 4774 | 8.07 |
| chrM_3l_4630926  | axo        | FBgn0262870 | INTRON                                         | NA   | 8.06 |
| chrM_3r_9161779  | CG8784     | FBgn0038140 | UPSTREAM                                       | 3906 | 8.06 |
| chrM_3r_9161779  | CG8795     | FBgn0038139 | UPSTREAM                                       | 1894 | 8.06 |
| chrM_2l_16258204 | EndoGI     | FBgn0028515 | INTRON                                         | NA   | 8.05 |
| chrM_2l_12468829 | bun        | FBgn0259176 | INTRON                                         | NA   | 8.05 |
| chrM_2l_976907   |            |             | SNP is more than 5000 bp away from known genes | NA   | 8.02 |
| chrM_2r_6734164  | CG30015    | FBgn0050015 | INTRON                                         | NA   | 8.02 |
| chrM_3r_9161655  | CG8784     | FBgn0038140 | UPSTREAM                                       | 4030 | 8.01 |
| chrM_3r_9161655  | CG8795     | FBgn0038139 | UPSTREAM                                       | 1770 | 8.01 |
| chrM_x_14709844  | rut        | FBgn0003301 | INTRON                                         | NA   | 8.01 |
| chrM_2r_6578432  | stan       | FBgn0024836 | INTRON                                         | NA   | 7.96 |
| chrM_2l_16362492 | jhamt      | FBgn0028841 | UPSTREAM                                       | 3427 | 7.94 |
| chrM_2r_6734151  | CG30015    | FBgn0050015 | INTRON                                         | NA   | 7.93 |
| chrM_2l_12468777 | bun        | FBgn0259176 | INTRON                                         | NA   | 7.92 |
| chrM_x_16074471  |            |             | SNP is more than 5000 bp away from known genes | NA   | 7.91 |
| chrM_3l_6254829  | ImpL3      | FBgn0001258 | INTRON                                         | NA   | 7.90 |
| chrM_2r_15450499 | sm         | FBgn0003435 | INTRON                                         | NA   | 7.90 |
| chrM_3r_18966534 | hh         | FBgn0004644 | INTRON                                         | NA   | 7.87 |
| chrM_x_15275362  | CG9164     | FBgn0030634 | UTR_3_PRIME                                    | NA   | 7.86 |
| chrM_x_15275367  | CG9164     | FBgn0030634 | UTR_3_PRIME                                    | NA   | 7.86 |
| chrM_2r_4681981  | sns        | FBgn0024189 | UPSTREAM                                       | 4041 | 7.86 |
| chrM_2r_4681981  | CG8746     | FBgn0033330 | DOWNSTREAM                                     | 699  | 7.86 |
| chrM_3l_22163688 | olf413     | FBgn0037153 | INTRON                                         | NA   | 7.84 |
| chrM_2r_2796520  | CG30158    | FBgn0050158 | INTRON                                         | NA   | 7.84 |

|                |         |             |                                                |      |      |
|----------------|---------|-------------|------------------------------------------------|------|------|
| chrX_15275732  | CG9164  | FBgn0030634 | INTRON                                         | NA   | 7.83 |
| chr2L_15766306 | wek     | FBgn0001990 | UTR_3_PRIME                                    | NA   | 7.83 |
| chr2L_13608642 | kuz     | FBgn0259984 | INTRON                                         | NA   | 7.82 |
| chr2L_13608590 | kuz     | FBgn0259984 | INTRON                                         | NA   | 7.78 |
| chrX_15275419  | CG9164  | FBgn0030634 | SYNONYMOUS_CODING                              | NA   | 7.78 |
| chr3R_15320159 | Dys     | FBgn0260003 | INTRON                                         | NA   | 7.76 |
| chr2L_13608604 | kuz     | FBgn0259984 | INTRON                                         | NA   | 7.75 |
| chr2R_15460277 | sm      | FBgn0003435 | INTRON                                         | NA   | 7.74 |
| chr2L_4051281  | ed      | FBgn0000547 | INTRON                                         | NA   | 7.72 |
| chrX_15276037  | CG9164  | FBgn0030634 | SYNONYMOUS_CODING                              | NA   | 7.71 |
| chr2R_6728017  | CG30015 | FBgn0050015 | SYNONYMOUS_CODING                              | NA   | 7.70 |
| chr2L_13608651 | kuz     | FBgn0259984 | INTRON                                         | NA   | 7.68 |
| chr3L_10615226 | CG43127 | FBgn0262592 | DOWNSTREAM                                     | 2602 | 7.67 |
| chr3L_10615226 | CG42521 | FBgn0260396 | DOWNSTREAM                                     | 940  | 7.67 |
| chr3L_10615235 | CG43127 | FBgn0262592 | DOWNSTREAM                                     | 2593 | 7.67 |
| chr3L_10615235 | CG42521 | FBgn0260396 | DOWNSTREAM                                     | 931  | 7.67 |
| chr3L_10615239 | CG43127 | FBgn0262592 | DOWNSTREAM                                     | 2589 | 7.67 |
| chr3L_10615239 | CG42521 | FBgn0260396 | DOWNSTREAM                                     | 927  | 7.67 |
| chr3R_9162157  | CG8784  | FBgn0038140 | UPSTREAM                                       | 3528 | 7.65 |
| chr3R_9162157  | CG8795  | FBgn0038139 | UPSTREAM                                       | 2272 | 7.65 |
| chr2R_18510065 | CG33143 | FBgn0053143 | INTRON                                         | NA   | 7.65 |
| chr2R_8238733  | ana3    | FBgn0033718 | DOWNSTREAM                                     | 150  | 7.65 |
| chr2R_8238733  | CG30047 | FBgn0050047 | UPSTREAM                                       | 565  | 7.65 |
| chr2L_8638991  | Sema-1a | FBgn0011259 | INTRON                                         | NA   | 7.65 |
| chr2R_5298432  | wun     | FBgn0016078 | INTRON                                         | NA   | 7.64 |
| chr2R_8130048  | CG43316 | FBgn0263021 | UPSTREAM                                       | 3    | 7.61 |
| chr2R_8130048  | CG43315 | FBgn0263020 | DOWNSTREAM                                     | 784  | 7.61 |
| chr2R_8133105  | CG43316 | FBgn0263021 | DOWNSTREAM                                     | 2327 | 7.60 |
| chr2R_8133105  | CG43244 | FBgn0262889 | UPSTREAM                                       | 938  | 7.60 |
| chr2R_8133171  | CG43244 | FBgn0262889 | UPSTREAM                                       | 1004 | 7.59 |
| chr2R_8133171  | CG43316 | FBgn0263021 | DOWNSTREAM                                     | 2393 | 7.59 |
| chr2R_18785975 | nahoda  | FBgn0034797 | INTRON                                         | NA   | 7.59 |
| chr3L_2220998  |         |             | SNP is more than 5000 bp away from known genes | NA   | 7.55 |
| chr2L_8639036  | Sema-1a | FBgn0011259 | INTRON                                         | NA   | 7.53 |
| chr3L_7849597  | Pdp1    | FBgn0016694 | INTRON                                         | NA   | 7.51 |
| chr3L_11101797 | CG12522 | FBgn0036131 | UTR_3_PRIME                                    | NA   | 7.47 |
| chr3L_829351   | CG13900 | FBgn0035162 | SYNONYMOUS_CODING                              | NA   | 7.47 |
| chr3L_829360   | CG13900 | FBgn0035162 | SYNONYMOUS_CODING                              | NA   | 7.47 |
| chrX_14404284  |         |             | SNP is more than 5000 bp away from known genes | NA   | 7.46 |
| chr3L_11101725 | CG12522 | FBgn0036131 | NON_SYNONYMOUS_CODING                          | NA   | 7.45 |
| chr2R_6730132  | CG30015 | FBgn0050015 | SYNONYMOUS_CODING                              | NA   | 7.44 |
| chrX_4618689   | Proc-R  | FBgn0029723 | INTRON                                         | NA   | 7.44 |
| chr2L_18381797 | Fas3    | FBgn0000636 | INTRON                                         | NA   | 7.44 |

|                  |         |             |                                                |      |      |
|------------------|---------|-------------|------------------------------------------------|------|------|
| chrM_3r_26729403 | Cyp4c3  | FBgn0015032 | DOWNSTREAM                                     | 2993 | 7.43 |
| chrM_3r_26729403 | CG33483 | FBgn0053483 | UPSTREAM                                       | 1520 | 7.43 |
| chrM_2l_970899   |         |             | SNP is more than 5000 bp away from known genes | NA   | 7.43 |
| chrM_3l_1277218  | CG32333 | FBgn0052333 | INTRON                                         | NA   | 7.43 |
| chrM_3l_1277225  | CG32333 | FBgn0052333 | INTRON                                         | NA   | 7.43 |
| chrM_3l_1277226  | CG32333 | FBgn0052333 | INTRON                                         | NA   | 7.43 |
| chrM_3l_1277227  | CG32333 | FBgn0052333 | INTRON                                         | NA   | 7.43 |
| chrM_x_21315361  | CG42343 | FBgn0259245 | INTRON                                         | NA   | 7.43 |
| chrM_x_21315362  | CG42343 | FBgn0259245 | INTRON                                         | NA   | 7.43 |
| chrM_2r_6570464  | stan    | FBgn0024836 | INTRON                                         | NA   | 7.42 |
| chrM_2l_3711191  | cutlet  | FBgn0015376 | NON_SYNONYMOUS_CODING                          | NA   | 7.41 |
| chrM_3l_10614430 | CG43127 | FBgn0262592 | DOWNSTREAM                                     | 3398 | 7.40 |
| chrM_3l_10614430 | CG42521 | FBgn0260396 | DOWNSTREAM                                     | 1736 | 7.40 |
| chrM_3l_2574451  | msn     | FBgn0010909 | INTRON                                         | NA   | 7.40 |
| chrM_3l_10616787 | CG43127 | FBgn0262592 | DOWNSTREAM                                     | 1041 | 7.39 |
| chrM_3l_10616787 | CG42521 | FBgn0260396 | UPSTREAM                                       | 111  | 7.39 |
| chrM_3l_5479057  | CG4835  | FBgn0035607 | DOWNSTREAM                                     | 2294 | 7.37 |
| chrM_3l_18488284 | AICR2   | FBgn0036789 | INTRON                                         | NA   | 7.36 |
| chrM_x_8916007   | rdgA    | FBgn0261549 | INTRON                                         | NA   | 7.36 |
| chrM_x_8916007   | CR43836 | FBgn0264384 | INTRON                                         | NA   | 7.36 |
| chrM_x_13408215  | Neto    | FBgn0052635 | INTRON                                         | NA   | 7.32 |
| chrM_3l_10631766 | CG8009  | FBgn0036090 | SYNONYMOUS_CODING                              | NA   | 7.31 |
| chrM_3l_2220902  |         |             | SNP is more than 5000 bp away from known genes | NA   | 7.31 |
| chrM_2l_8639111  | Sema-1a | FBgn0011259 | INTRON                                         | NA   | 7.30 |
| chrM_2r_18509918 | CG33143 | FBgn0053143 | INTRON                                         | NA   | 7.30 |
| chrM_2r_6570419  | stan    | FBgn0024836 | INTRON                                         | NA   | 7.29 |
| chrM_2r_19462480 | apt     | FBgn0015903 | INTRON                                         | NA   | 7.29 |
| chrM_2r_9279637  | CG43691 | FBgn0263774 | NON_SYNONYMOUS_CODING                          | NA   | 7.28 |
| chrM_x_19293197  | kek5    | FBgn0031016 | INTRON                                         | NA   | 7.27 |
| chrM_3l_18488329 | AICR2   | FBgn0036789 | INTRON                                         | NA   | 7.27 |
| chrM_2l_2585503  | Drp1    | FBgn0026479 | UPSTREAM                                       | 55   | 7.25 |
| chrM_2l_2585503  | CG15394 | FBgn0250835 | UPSTREAM                                       | 3351 | 7.25 |
| chrM_2r_6570465  | stan    | FBgn0024836 | INTRON                                         | NA   | 7.25 |
| chrM_x_12656071  | CG12717 | FBgn0030420 | SYNONYMOUS_CODING                              | NA   | 7.25 |
| chrM_2l_9135470  | CG32982 | FBgn0052982 | INTRON                                         | NA   | 7.24 |
| chrM_2r_9279659  | CG43691 | FBgn0263774 | SYNONYMOUS_CODING                              | NA   | 7.24 |
| chrM_3l_10707096 |         |             | SNP is more than 5000 bp away from known genes | NA   | 7.23 |
| chrM_3l_10707097 |         |             | SNP is more than 5000 bp away from known genes | NA   | 7.23 |
| chrM_2l_1296034  | robo3   | FBgn0041097 | DOWNSTREAM                                     | 1347 | 7.23 |
| chrM_3l_6903932  | Prat2   | FBgn0041194 | DOWNSTREAM                                     | 1167 | 7.23 |
| chrM_2l_11397558 |         |             | SNP is more than 5000 bp away                  | NA   | 7.22 |



|                  |         |             |                                                |      |      |
|------------------|---------|-------------|------------------------------------------------|------|------|
|                  |         |             | from known genes                               |      |      |
| chrM_2r_1563527  | scaf    | FBgn0033033 | DOWNSTREAM                                     | 727  | 7.22 |
| chrM_2r_1563527  | kune    | FBgn0033032 | DOWNSTREAM                                     | 3225 | 7.22 |
| chrM_2r_6575211  | stan    | FBgn0024836 | INTRON                                         | NA   | 7.22 |
| chrM_2l_6843244  | sens-2  | FBgn0051632 | DOWNSTREAM                                     | 4239 | 7.21 |
| chrM_x_12001735  | CR43960 | FBgn0264675 | INTRON                                         | NA   | 7.19 |
| chrM_x_12001735  | CG2750  | FBgn0030376 | INTRON                                         | NA   | 7.19 |
| chrM_2l_3711118  | cutlet  | FBgn0015376 | SYNONYMOUS_CODING                              | NA   | 7.19 |
| chrM_2l_3711130  | cutlet  | FBgn0015376 | SYNONYMOUS_CODING                              | NA   | 7.19 |
| chrM_2r_6729331  | CG30015 | FBgn0050015 | SYNONYMOUS_CODING                              | NA   | 7.19 |
| chrM_2l_3575889  | CG43815 | FBgn0264363 | UPSTREAM                                       | 321  | 7.18 |
| chrM_2l_3575889  | CR43822 | FBgn0264370 | DOWNSTREAM                                     | 83   | 7.18 |
| chrM_3r_20665770 | CG13636 | FBgn0039232 | UTR_3_PRIME                                    | NA   | 7.17 |
| chrM_3l_855884   | dpr20   | FBgn0035170 | INTRON                                         | NA   | 7.16 |
| chrM_3l_14205832 | nuf     | FBgn0013718 | INTRON                                         | NA   | 7.16 |
| chrM_3l_14205829 | nuf     | FBgn0013718 | INTRON                                         | NA   | 7.16 |
| chrM_3l_14205831 | nuf     | FBgn0013718 | INTRON                                         | NA   | 7.16 |
| chrM_3r_3726146  | wtrw    | FBgn0260005 | SYNONYMOUS_CODING                              | NA   | 7.15 |
| chrM_2l_16054783 | beat-1a | FBgn0013433 | INTRON                                         | NA   | 7.15 |
| chrM_3l_10632370 | CG8009  | FBgn0036090 | SYNONYMOUS_CODING                              | NA   | 7.14 |
| chrM_2r_13812178 | elk     | FBgn0011589 | SYNONYMOUS_CODING                              | NA   | 7.13 |
| chrM_2l_15805377 |         |             | SNP is more than 5000 bp away from known genes | NA   | 7.13 |
| chrM_2r_9279672  | CG43691 | FBgn0263774 | NON_SYNONYMOUS_CODING                          | NA   | 7.12 |
| chrM_2l_10586312 | Trim9   | FBgn0051721 | INTRON                                         | NA   | 7.12 |
| chrM_2l_11770148 |         |             | SNP is more than 5000 bp away from known genes | NA   | 7.12 |
| chrM_3l_13766739 | bru-3   | FBgn0264001 | INTRON                                         | NA   | 7.12 |
| chrM_3l_10004092 | dpr6    | FBgn0040823 | INTRON                                         | NA   | 7.12 |
| chrM_3l_10004108 | dpr6    | FBgn0040823 | INTRON                                         | NA   | 7.12 |
| chrM_3r_1270839  | CG14669 | FBgn0037326 | INTRON                                         | NA   | 7.12 |
| chrM_3l_18488341 | AlCR2   | FBgn0036789 | INTRON                                         | NA   | 7.12 |
| chrM_2l_13608629 | kuz     | FBgn0259984 | INTRON                                         | NA   | 7.10 |
| chrM_3l_6903985  | Prat2   | FBgn0041194 | DOWNSTREAM                                     | 1114 | 7.09 |
| chrM_3l_4621795  | CG32246 | FBgn0052246 | SYNONYMOUS_CODING                              | NA   | 7.09 |
| chrM_x_9214582   | c12.2   | FBgn0040234 | INTRON                                         | NA   | 7.08 |
| chrM_2l_9513712  | CG33298 | FBgn0032120 | INTRON                                         | NA   | 7.08 |
| chrM_x_3538650   | AlstR   | FBgn0028961 | INTRON                                         | NA   | 7.07 |
| chrM_3r_20559590 | tok     | FBgn0004885 | INTRON                                         | NA   | 7.06 |
| chrM_3l_6574746  | jv      | FBgn0263973 | INTRON                                         | NA   | 7.05 |
| chrM_3l_6574746  | CG18769 | FBgn0042185 | INTRON                                         | NA   | 7.05 |
| chrM_3r_21380698 | msi     | FBgn0011666 | INTRON                                         | NA   | 7.03 |
| chrM_3r_10187030 | CG31320 | FBgn0051320 | UTR_5_PRIME                                    | NA   | 7.02 |
| chrM_2r_6729208  | CG30015 | FBgn0050015 | SYNONYMOUS_CODING                              | NA   | 7.01 |
| chrM_3r_23781753 | CG5527  | FBgn0039564 | SYNONYMOUS_CODING                              | NA   | 7.01 |

|                               |         |             |                   |    |      |
|-------------------------------|---------|-------------|-------------------|----|------|
| chr <sub>m</sub> _2r_5298746  | wun     | FBgn0016078 | INTRON            | NA | 7.00 |
| chr <sub>m</sub> _3l_10631736 | CG8009  | FBgn0036090 | SYNONYMOUS_CODING | NA | 7.00 |
| chr <sub>m</sub> _x_10073599  | CG43902 | FBgn0264503 | INTRON            | NA | 7.00 |
| chr <sub>m</sub> _3l_22916473 | CG12768 | FBgn0037206 | UTR_3_PRIME       | NA | 7.00 |

**Supplementary Table 3c.** SNPs significantly associated with TAG.

| Position<br>(Chromosome arm,<br>base) | Gene symbol | FlyBase ID  | Site class                                        | Bases<br>from<br>gene | p-value<br>(-log10) |
|---------------------------------------|-------------|-------------|---------------------------------------------------|-----------------------|---------------------|
| chr <sub>m</sub> _3r_962497           | CG12589     | FBgn0040684 | DOWNSTREAM                                        | 282                   | 12.07               |
| chr <sub>m</sub> _2r_15067444         | hppy        | FBgn0263395 | INTRON                                            | NA                    | 11.84               |
| chr <sub>m</sub> _3r_1698167          | CG34113     | FBgn0083949 | INTRON                                            | NA                    | 11.45               |
| chr <sub>m</sub> _2r_14167711         | sbb         | FBgn0010575 | INTRON                                            | NA                    | 10.97               |
| chr <sub>m</sub> _3l_11006124         | klu         | FBgn0013469 | UPSTREAM                                          | 4191                  | 10.88               |
| chr <sub>m</sub> _x_5022378           | rg          | FBgn0086911 | INTRON                                            | NA                    | 10.73               |
| chr <sub>m</sub> _x_5022421           | rg          | FBgn0086911 | INTRON                                            | NA                    | 10.73               |
| chr <sub>m</sub> _x_5022446           | rg          | FBgn0086911 | INTRON                                            | NA                    | 10.73               |
| chr <sub>m</sub> _3l_11006052         | klu         | FBgn0013469 | UPSTREAM                                          | 4119                  | 10.55               |
| chr <sub>m</sub> _3r_25235093         | Ptp99A      | FBgn0004369 | INTRON                                            | NA                    | 10.11               |
| chr <sub>m</sub> _3r_25235095         | Ptp99A      | FBgn0004369 | INTRON                                            | NA                    | 10.11               |
| chr <sub>m</sub> _x_14919621          | be          | FBgn0052594 | INTRON                                            | NA                    | 10.00               |
| chr <sub>m</sub> _x_14919621          | hiw         | FBgn0030600 | INTRON                                            | NA                    | 10.00               |
| chr <sub>m</sub> _3r_13295471         | Dscam3      | FBgn0261046 | DOWNSTREAM                                        | 4186                  | 9.92                |
| chr <sub>m</sub> _2r_7927904          | RpIII128    | FBgn0004463 | SYNONYMOUS_CODING                                 | NA                    | 9.87                |
| chr <sub>m</sub> _3r_25235132         | Ptp99A      | FBgn0004369 | INTRON                                            | NA                    | 9.86                |
| chr <sub>m</sub> _x_16536018          | mthl1       | FBgn0030766 | NON_SYNONYMOUS_CODING                             | NA                    | 9.86                |
| chr <sub>m</sub> _3l_12203385         | app         | FBgn0260941 | UTR_3_PRIME                                       | NA                    | 9.85                |
| chr <sub>m</sub> _3l_8705647          |             |             | SNP is more than 5000 bp away<br>from known genes | NA                    | 9.83                |
| chr <sub>m</sub> _3l_8710596          | SrpRbeta    | FBgn0011509 | DOWNSTREAM                                        | 1453                  | 9.83                |
| chr <sub>m</sub> _3l_8710596          | CG32022     | FBgn0052022 | DOWNSTREAM                                        | 2784                  | 9.83                |
| chr <sub>m</sub> _3l_8710971          | SrpRbeta    | FBgn0011509 | DOWNSTREAM                                        | 1078                  | 9.83                |
| chr <sub>m</sub> _3l_8710971          | CG32022     | FBgn0052022 | DOWNSTREAM                                        | 2409                  | 9.83                |
| chr <sub>m</sub> _2r_17584889         | CG17922     | FBgn0034656 | UPSTREAM                                          | 232                   | 9.70                |
| chr <sub>m</sub> _2r_17584889         | HmgZ        | FBgn0010228 | DOWNSTREAM                                        | 167                   | 9.70                |
| chr <sub>m</sub> _x_16536055          | mthl1       | FBgn0030766 | SYNONYMOUS_CODING                                 | NA                    | 9.65                |
| chr <sub>m</sub> _x_3859812           | CG6428      | FBgn0029689 | UTR_3_PRIME                                       | NA                    | 9.64                |
| chr <sub>m</sub> _3l_8705580          |             |             | SNP is more than 5000 bp away<br>from known genes | NA                    | 9.60                |
| chr <sub>m</sub> _3r_11772759         | Sap47       | FBgn0013334 | INTRON                                            | NA                    | 9.60                |
| chr <sub>m</sub> _x_16234678          | Dsp1        | FBgn0011764 | DOWNSTREAM                                        | 1874                  | 9.60                |
| chr <sub>m</sub> _2l_5694680          |             |             | SNP is more than 5000 bp away<br>from known genes | NA                    | 9.54                |
| chr <sub>m</sub> _3l_8710322          | SrpRbeta    | FBgn0011509 | DOWNSTREAM                                        | 1727                  | 9.53                |
| chr <sub>m</sub> _3l_8710322          | CG32022     | FBgn0052022 | DOWNSTREAM                                        | 3058                  | 9.53                |
| chr <sub>m</sub> _3r_11022714         | CG42542     | FBgn0260659 | UTR_5_PRIME                                       | NA                    | 9.52                |
| chr <sub>m</sub> _x_10141989          | Hk          | FBgn0263220 | INTRON                                            | NA                    | 9.45                |
| chr <sub>m</sub> _x_10142017          | Hk          | FBgn0263220 | INTRON                                            | NA                    | 9.44                |
| chr <sub>m</sub> _2l_11798122         | crol        | FBgn0020309 | INTRON                                            | NA                    | 9.44                |

|                  |           |             |                                                |      |      |
|------------------|-----------|-------------|------------------------------------------------|------|------|
| chrM_3l_20499430 | CG5078    | FBgn0037005 | NON_SYNONYMOUS_CODING                          | NA   | 9.42 |
| chrM_x_3862905   | CG6414    | FBgn0029690 | DOWNSTREAM                                     | 126  | 9.42 |
| chrM_x_3862905   | CG6428    | FBgn0029689 | UPSTREAM                                       | 308  | 9.42 |
| chrM_x_17777078  | mnB       | FBgn0259168 | INTRON                                         | NA   | 9.41 |
| chrM_2r_7928303  | RpIII128  | FBgn0004463 | SYNONYMOUS_CODING                              | NA   | 9.41 |
| chrM_2r_7928294  | RpIII128  | FBgn0004463 | SYNONYMOUS_CODING                              | NA   | 9.38 |
| chrM_3l_20464996 | CG32428   | FBgn0052428 | INTRON                                         | NA   | 9.34 |
| chrM_3l_15154324 | CG7011    | FBgn0036489 | SYNONYMOUS_CODING                              | NA   | 9.31 |
| chrM_3l_6151699  | Cpr65Ay   | FBgn0085300 | UTR_5_PRIME                                    | NA   | 9.30 |
| chrM_x_8724841   |           |             | SNP is more than 5000 bp away from known genes | NA   | 9.29 |
| chrM_3r_23465789 | CG34294   | FBgn0085323 | NON_SYNONYMOUS_CODING                          | NA   | 9.28 |
| chrM_3r_6858920  | CG34114   | FBgn0083950 | INTRON                                         | NA   | 9.28 |
| chrM_3r_6858921  | CG34114   | FBgn0083950 | INTRON                                         | NA   | 9.28 |
| chrM_2l_15289419 | CG15260   | FBgn0028850 | DOWNSTREAM                                     | 2007 | 9.27 |
| chrM_2l_15289419 | ms(2)35Ci | FBgn0011239 | UPSTREAM                                       | 3049 | 9.27 |
| chrM_3l_10354912 | mir-276a  | FBgn0262439 | UPSTREAM                                       | 3416 | 9.26 |
| chrM_x_3864288   | CG6414    | FBgn0029690 | INTRON                                         | NA   | 9.26 |
| chrM_3r_16254063 | mun       | FBgn0262869 | INTRON                                         | NA   | 9.23 |
| chrM_3l_11770117 | Pi3K68D   | FBgn0015278 | INTRON                                         | NA   | 9.19 |
| chrM_x_2453446   | Pdfr      | FBgn0260753 | INTRON                                         | NA   | 9.16 |
| chrM_3l_7055771  | CG8641    | FBgn0035733 | SYNONYMOUS_CODING                              | NA   | 9.16 |
| chrM_2r_7928168  | RpIII128  | FBgn0004463 | SYNONYMOUS_CODING                              | NA   | 9.16 |
| chrM_2r_11473329 |           |             | SNP is more than 5000 bp away from known genes | NA   | 9.16 |
| chrM_3l_9009365  | Doc2      | FBgn0035956 | INTRON                                         | NA   | 9.13 |
| chrM_2l_10970127 | CG33129   | FBgn0053129 | UTR_5_PRIME                                    | NA   | 9.10 |
| chrM_x_12949796  | CG42629   | FBgn0261388 | INTRON                                         | NA   | 9.03 |
| chrM_2r_7369979  | inv       | FBgn0001269 | INTRON                                         | NA   | 9.03 |
| chrM_2r_17237640 | CG17974   | FBgn0034624 | INTRON                                         | NA   | 9.02 |
| chrM_2r_17237620 | CG17974   | FBgn0034624 | INTRON                                         | NA   | 9.01 |
| chrM_x_3867078   | CG6414    | FBgn0029690 | UPSTREAM                                       | 1697 | 9.00 |
| chrM_x_3867078   | CG6428    | FBgn0029689 | UPSTREAM                                       | 4481 | 9.00 |
| chrM_2r_7886493  | otk       | FBgn0004839 | DOWNSTREAM                                     | 2490 | 9.00 |
| chrM_3r_20449285 | mld       | FBgn0263490 | UTR_3_PRIME                                    | NA   | 8.99 |
| chrM_2l_7927199  | Snoo      | FBgn0085450 | INTRON                                         | NA   | 8.95 |
| chrM_2r_14596876 | CG15087   | FBgn0034380 | SYNONYMOUS_CODING                              | NA   | 8.94 |
| chrM_3l_2627277  | Pxn       | FBgn0011828 | INTRON                                         | NA   | 8.91 |
| chrM_2l_1215397  | CR43263   | FBgn0262944 | DOWNSTREAM                                     | 1457 | 8.91 |
| chrM_2l_1215397  | CG42329   | FBgn0259229 | UPSTREAM                                       | 3921 | 8.91 |
| chrM_3r_23465893 | CG34294   | FBgn0085323 | NON_SYNONYMOUS_CODING                          | NA   | 8.91 |
| chrM_x_3862818   | CG6414    | FBgn0029690 | DOWNSTREAM                                     | 213  | 8.91 |
| chrM_x_3862818   | CG6428    | FBgn0029689 | UPSTREAM                                       | 221  | 8.91 |
| chrM_x_3866252   | CG6428    | FBgn0029689 | UPSTREAM                                       | 3655 | 8.90 |
| chrM_x_3866252   | CG6414    | FBgn0029690 | UPSTREAM                                       | 871  | 8.90 |

|                  |          |             |                       |      |      |
|------------------|----------|-------------|-----------------------|------|------|
| chrM_2r_10804295 | CG10249  | FBgn0027596 | INTRON                | NA   | 8.90 |
| chrM_2l_15300432 | CG15262  | FBgn0028852 | DOWNSTREAM            | 1065 | 8.87 |
| chrM_2l_15300432 | CR43764  | FBgn0264264 | UPSTREAM              | 3019 | 8.87 |
| chrM_2r_20255301 | bs       | FBgn0004101 | INTRON                | NA   | 8.86 |
| chrM_3r_16254471 | mun      | FBgn0262869 | INTRON                | NA   | 8.85 |
| chrM_x_3866193   | CG6414   | FBgn0029690 | UPSTREAM              | 812  | 8.83 |
| chrM_x_3866193   | CG6428   | FBgn0029689 | UPSTREAM              | 3596 | 8.83 |
| chrM_3l_11615069 | CG6084   | FBgn0086254 | INTRON                | NA   | 8.83 |
| chrM_3r_25894792 | sima     | FBgn0015542 | INTRON                | NA   | 8.79 |
| chrM_2r_7928169  | RpIII128 | FBgn0004463 | SYNONYMOUS_CODING     | NA   | 8.77 |
| chrM_3r_18805524 | Nha2     | FBgn0263390 | DOWNSTREAM            | 1657 | 8.76 |
| chrM_3r_18805524 | CG17244  | FBgn0039031 | DOWNSTREAM            | 1900 | 8.76 |
| chrM_3r_16638943 | Fancd2   | FBgn0038827 | INTRON                | NA   | 8.75 |
| chrM_3l_6151698  | Cpr65Ay  | FBgn0085300 | UTR_5_PRIME           | NA   | 8.75 |
| chrM_3l_6151719  | Cpr65Ay  | FBgn0085300 | UTR_5_PRIME           | NA   | 8.75 |
| chrM_3l_2202045  | CG8960   | FBgn0035315 | DOWNSTREAM            | 3956 | 8.75 |
| chrM_2r_15827307 | CR43421  | FBgn0263340 | DOWNSTREAM            | 80   | 8.75 |
| chrM_2r_15827307 | CG43195  | FBgn0262824 | DOWNSTREAM            | 4461 | 8.75 |
| chrM_2r_15827415 | CG43195  | FBgn0262824 | DOWNSTREAM            | 4353 | 8.75 |
| chrM_2r_7928187  | RpIII128 | FBgn0004463 | SYNONYMOUS_CODING     | NA   | 8.73 |
| chrM_2r_7928060  | RpIII128 | FBgn0004463 | SYNONYMOUS_CODING     | NA   | 8.72 |
| chrM_x_19403091  | Pfrx     | FBgn0027621 | UTR_3_PRIME           | NA   | 8.71 |
| chrM_2r_19147755 | CG12782  | FBgn0034838 | DOWNSTREAM            | 4037 | 8.71 |
| chrM_3r_22011079 | CG31086  | FBgn0051086 | UTR_5_PRIME           | NA   | 8.68 |
| chrM_3r_22011079 | CG31323  | FBgn0051323 | UTR_3_PRIME           | NA   | 8.68 |
| chrM_2r_7928600  | RpIII128 | FBgn0004463 | SYNONYMOUS_CODING     | NA   | 8.67 |
| chrM_2r_15827697 | CG42690  | FBgn0261580 | DOWNSTREAM            | 4766 | 8.67 |
| chrM_2r_15827697 | CG43195  | FBgn0262824 | DOWNSTREAM            | 4071 | 8.67 |
| chrM_3l_11615116 | CG6084   | FBgn0086254 | INTRON                | NA   | 8.66 |
| chrM_3l_2202046  | CG8960   | FBgn0035315 | DOWNSTREAM            | 3957 | 8.65 |
| chrM_x_3865307   | CG6414   | FBgn0029690 | SYNONYMOUS_CODING     | NA   | 8.64 |
| chrM_2r_7927883  | RpIII128 | FBgn0004463 | SYNONYMOUS_CODING     | NA   | 8.62 |
| chrM_2r_8612003  | CG42663  | FBgn0261545 | INTRON                | NA   | 8.61 |
| chrM_3l_5802659  | S6k      | FBgn0015806 | INTRON                | NA   | 8.61 |
| chrM_2r_9611603  | fas      | FBgn0000633 | INTRON                | NA   | 8.60 |
| chrM_3r_6863343  | CG34114  | FBgn0083950 | INTRON                | NA   | 8.59 |
| chrM_3l_20467038 | CG5969   | FBgn0036998 | NON_SYNONYMOUS_CODING | NA   | 8.59 |
| chrM_3l_4695034  | Gef64C   | FBgn0035574 | INTRON                | NA   | 8.59 |
| chrM_2r_10879323 | CG7639   | FBgn0033989 | INTRON                | NA   | 8.58 |
| chrM_2r_6222131  | CG42732  | FBgn0261698 | INTRON                | NA   | 8.56 |
| chrM_3l_21597451 | AP-2     | FBgn0261953 | INTRON                | NA   | 8.54 |
| chrM_2r_15067594 | hppy     | FBgn0263395 | INTRON                | NA   | 8.54 |
| chrM_x_16536043  | mthl1    | FBgn0030766 | SYNONYMOUS_CODING     | NA   | 8.54 |
| chrM_2r_15067615 | hppy     | FBgn0263395 | INTRON                | NA   | 8.52 |

|                  |          |             |                                                |      |      |
|------------------|----------|-------------|------------------------------------------------|------|------|
| chrM_3l_2318672  | DmsR-1   | FBgn0035331 | UPSTREAM                                       | 4021 | 8.52 |
| chrM_2r_17237960 | CG17974  | FBgn0034624 | START_GAINED                                   | NA   | 8.52 |
| chrM_2r_17237736 | CG17974  | FBgn0034624 | INTRON                                         | NA   | 8.50 |
| chrM_3l_12253473 | app      | FBgn0260941 | INTRON                                         | NA   | 8.48 |
| chrM_2r_14596572 | CG15087  | FBgn0034380 | SYNONYMOUS_CODING                              | NA   | 8.47 |
| chrM_2r_14596681 | CG15087  | FBgn0034380 | SYNONYMOUS_CODING                              | NA   | 8.47 |
| chrM_3r_6862427  | CG34114  | FBgn0083950 | INTRON                                         | NA   | 8.47 |
| chrM_3r_25316854 | CG2006   | FBgn0039664 | UTR_3_PRIME                                    | NA   | 8.46 |
| chrM_3r_25316854 | Spase12  | FBgn0040623 | UTR_5_PRIME                                    | NA   | 8.46 |
| chrM_2r_17237408 | CG17974  | FBgn0034624 | INTRON                                         | NA   | 8.46 |
| chrM_2r_7928213  | RpIII128 | FBgn0004463 | SYNONYMOUS_CODING                              | NA   | 8.46 |
| chrM_3l_7133507  | melt     | FBgn0023001 | SYNONYMOUS_CODING                              | NA   | 8.44 |
| chrM_2l_6373214  | slam     | FBgn0043854 | INTRON                                         | NA   | 8.43 |
| chrM_2r_15067697 | hppy     | FBgn0263395 | INTRON                                         | NA   | 8.43 |
| chrM_2r_15067698 | hppy     | FBgn0263395 | INTRON                                         | NA   | 8.43 |
| chrM_2r_10323860 | Oaz      | FBgn0261613 | INTRON                                         | NA   | 8.42 |
| chrM_2r_7928552  | RpIII128 | FBgn0004463 | SYNONYMOUS_CODING                              | NA   | 8.42 |
| chrM_2r_7928570  | RpIII128 | FBgn0004463 | SYNONYMOUS_CODING                              | NA   | 8.42 |
| chrM_3l_18355537 |          |             | SNP is more than 5000 bp away from known genes | NA   | 8.40 |
| chrM_2r_14170724 | sbb      | FBgn0010575 | SYNONYMOUS_CODING                              | NA   | 8.38 |
| chrM_x_14919650  | be       | FBgn0052594 | INTRON                                         | NA   | 8.38 |
| chrM_x_14919650  | hiw      | FBgn0030600 | INTRON                                         | NA   | 8.38 |
| chrM_3r_6296733  |          |             | SNP is more than 5000 bp away from known genes | NA   | 8.36 |
| chrM_3r_6296833  |          |             | SNP is more than 5000 bp away from known genes | NA   | 8.36 |
| chrM_3l_21397522 | rgn      | FBgn0261258 | INTRON                                         | NA   | 8.36 |
| chrM_2r_7928696  | RpIII128 | FBgn0004463 | SYNONYMOUS_CODING                              | NA   | 8.34 |
| chrM_3r_14198670 | gl       | FBgn0004618 | UPSTREAM                                       | 210  | 8.34 |
| chrM_3r_21068896 | bam      | FBgn0000158 | UTR_3_PRIME                                    | NA   | 8.33 |
| chrM_3r_21068896 | CG11854  | FBgn0039299 | UTR_3_PRIME                                    | NA   | 8.33 |
| chrM_3r_6871565  | CG34114  | FBgn0083950 | UTR_3_PRIME                                    | NA   | 8.33 |
| chrM_3r_6862432  | CG34114  | FBgn0083950 | INTRON                                         | NA   | 8.32 |
| chrM_x_19403120  | Pfrx     | FBgn0027621 | UTR_3_PRIME                                    | NA   | 8.30 |
| chrM_3l_5702364  | sif      | FBgn0085447 | INTRON                                         | NA   | 8.30 |
| chrM_3r_6863302  | CG34114  | FBgn0083950 | INTRON                                         | NA   | 8.29 |
| chrM_3r_6871879  | CG34114  | FBgn0083950 | INTRON                                         | NA   | 8.29 |
| chrM_2r_13721761 | grh      | FBgn0259211 | INTRON                                         | NA   | 8.27 |
| chrM_3r_11996375 | CG6006   | FBgn0063649 | UTR_3_PRIME                                    | NA   | 8.27 |
| chrM_2r_14172109 | sbb      | FBgn0010575 | SYNONYMOUS_CODING                              | NA   | 8.26 |
| chrM_3r_23931978 |          |             | SNP is more than 5000 bp away from known genes | NA   | 8.25 |
| chrM_2r_14176935 | sbb      | FBgn0010575 | INTRON                                         | NA   | 8.24 |
| chrM_2r_14176935 | CG14502  | FBgn0034321 | INTRON                                         | NA   | 8.24 |

|                  |            |             |                                                |      |      |
|------------------|------------|-------------|------------------------------------------------|------|------|
| chrn_2l_5521711  | CG7371     | FBgn0031710 | SYNONYMOUS_CODING                              | NA   | 8.24 |
| chrn_3l_8323849  | CG34461    | FBgn0250833 | DOWNSTREAM                                     | 2442 | 8.23 |
| chrn_3l_8323849  | CG34462    | FBgn0085491 | DOWNSTREAM                                     | 512  | 8.23 |
| chrn_3l_22948868 | Mes2       | FBgn0037207 | DOWNSTREAM                                     | 3520 | 8.22 |
| chrn_3l_22948868 | CG32461    | FBgn0052461 | UPSTREAM                                       | 466  | 8.22 |
| chrn_3r_6871372  | CG34114    | FBgn0083950 | UTR_3_PRIME                                    | NA   | 8.21 |
| chrn_3r_23933504 |            |             | SNP is more than 5000 bp away from known genes | NA   | 8.21 |
| chrn_2r_7928567  | RpIII128   | FBgn0004463 | SYNONYMOUS_CODING                              | NA   | 8.19 |
| chrn_x_6769215   | CG43736    | FBgn0263993 | INTRON                                         | NA   | 8.19 |
| chrn_3r_5738033  | Glut4EF    | FBgn0263097 | INTRON                                         | NA   | 8.18 |
| chrn_3l_6151439  | Cpr65Ay    | FBgn0085300 | SYNONYMOUS_CODING                              | NA   | 8.18 |
| chrn_3l_6151458  | Cpr65Ay    | FBgn0085300 | INTRON                                         | NA   | 8.18 |
| chrn_3l_6151478  | Cpr65Ay    | FBgn0085300 | INTRON                                         | NA   | 8.18 |
| chrn_3l_6151484  | Cpr65Ay    | FBgn0085300 | INTRON                                         | NA   | 8.18 |
| chrn_3l_6151486  | Cpr65Ay    | FBgn0085300 | INTRON                                         | NA   | 8.18 |
| chrn_3r_17035860 | SNF4Agamma | FBgn0264357 | INTRON                                         | NA   | 8.18 |
| chrn_3r_6858781  | CG34114    | FBgn0083950 | INTRON                                         | NA   | 8.17 |
| chrn_3r_6691275  | SelR       | FBgn0037847 | SYNONYMOUS_CODING                              | NA   | 8.17 |
| chrn_2r_7929617  | RpIII128   | FBgn0004463 | SYNONYMOUS_CODING                              | NA   | 8.17 |
| chrn_2r_7886473  | otk        | FBgn0004839 | DOWNSTREAM                                     | 2510 | 8.17 |
| chrn_3l_8941723  | CG43783    | FBgn0264305 | INTRON                                         | NA   | 8.16 |
| chrn_3l_8941723  | orb2       | FBgn0264307 | INTRON                                         | NA   | 8.16 |
| chrn_3r_4899495  | pum        | FBgn0003165 | INTRON                                         | NA   | 8.16 |
| chrn_3l_6151331  | Cpr65Ay    | FBgn0085300 | SYNONYMOUS_CODING                              | NA   | 8.16 |
| chrn_2r_7935363  | Drep-1     | FBgn0024732 | INTRON                                         | NA   | 8.16 |
| chrn_x_3866186   | CG6414     | FBgn0029690 | UPSTREAM                                       | 805  | 8.14 |
| chrn_x_3866186   | CG6428     | FBgn0029689 | UPSTREAM                                       | 3589 | 8.14 |
| chrn_2r_14172542 | sbb        | FBgn0010575 | INTRON                                         | NA   | 8.13 |
| chrn_2r_7886483  | otk        | FBgn0004839 | DOWNSTREAM                                     | 2500 | 8.12 |
| chrn_x_4460281   | CG32773    | FBgn0052773 | INTRON                                         | NA   | 8.10 |

**Supplementary Table 3d.** SNPs significantly associated with glucose.

| Position<br>(Chromosome arm,<br>base) | Gene symbol        | FlyBase ID  | Site class                                        | Bases<br>from<br>gene | p-value<br>(-log10) |
|---------------------------------------|--------------------|-------------|---------------------------------------------------|-----------------------|---------------------|
| chrM_2r_11773694                      | sli                | FBgn0264089 | INTRON                                            | NA                    | 14.81               |
| chrM_3r_14502104                      | CG7705             | FBgn0038639 | UTR_3_PRIME                                       | NA                    | 14.65               |
| chrM_3r_14502107                      | CG7705             | FBgn0038639 | UTR_3_PRIME                                       | NA                    | 14.55               |
| chrM_3l_3798748                       | CG32264            | FBgn0052264 | INTRON                                            | NA                    | 14.24               |
| chrM_3r_16174735                      |                    |             | SNP is more than 5000 bp away<br>from known genes | NA                    | 14.11               |
| chrM_3r_14502098                      | CG7705             | FBgn0038639 | UTR_3_PRIME                                       | NA                    | 14.09               |
| chrM_3r_20323256                      |                    |             | SNP is more than 5000 bp away<br>from known genes | NA                    | 14.08               |
| chrM_2l_7586215                       | Spn7               | FBgn0083141 | DOWNSTREAM                                        | 2881                  | 13.93               |
| chrM_x_3202872                        | dnc                | FBgn0000479 | INTRON                                            | NA                    | 13.74               |
| chrM_3r_20320641                      | nAcRalpha-<br>96Ab | FBgn0000039 | DOWNSTREAM                                        | 3766                  | 13.51               |
| chrM_3r_20323341                      |                    |             | SNP is more than 5000 bp away<br>from known genes | NA                    | 13.51               |
| chrM_3r_20320706                      | nAcRalpha-<br>96Ab | FBgn0000039 | DOWNSTREAM                                        | 3831                  | 13.43               |
| chrM_2r_8327699                       | Dyb                | FBgn0033739 | INTRON                                            | NA                    | 13.29               |
| chrM_3r_20325371                      |                    |             | SNP is more than 5000 bp away<br>from known genes | NA                    | 13.21               |
| chrM_3r_20325398                      |                    |             | SNP is more than 5000 bp away<br>from known genes | NA                    | 13.21               |
| chrM_x_3202877                        | dnc                | FBgn0000479 | INTRON                                            | NA                    | 13.19               |
| chrM_3r_20324464                      |                    |             | SNP is more than 5000 bp away<br>from known genes | NA                    | 13.16               |
| chrM_2r_7755308                       | CG13185            | FBgn0033661 | DOWNSTREAM                                        | 73                    | 13.15               |
| chrM_2r_7755308                       | CR42532            | FBgn0260437 | DOWNSTREAM                                        | 224                   | 13.15               |
| chrM_2r_7755310                       | CR42532            | FBgn0260437 | DOWNSTREAM                                        | 226                   | 13.15               |
| chrM_2r_7755310                       | CG13185            | FBgn0033661 | DOWNSTREAM                                        | 71                    | 13.15               |
| chrM_3r_16174621                      | Ir92a              | FBgn0038789 | DOWNSTREAM                                        | 4997                  | 13.12               |
| chrM_3r_20325232                      |                    |             | SNP is more than 5000 bp away<br>from known genes | NA                    | 13.01               |
| chrM_3r_20325263                      |                    |             | SNP is more than 5000 bp away<br>from known genes | NA                    | 13.01               |
| chrM_3r_20325166                      |                    |             | SNP is more than 5000 bp away<br>from known genes | NA                    | 13.01               |
| chrM_3r_22761063                      | sda                | FBgn0015541 | INTRON                                            | NA                    | 12.78               |
| chrM_3r_20325098                      |                    |             | SNP is more than 5000 bp away<br>from known genes | NA                    | 12.66               |
| chrM_3r_17216223                      | bap                | FBgn0004862 | DOWNSTREAM                                        | 52                    | 12.65               |
| chrM_2r_12389852                      | Sema-2a            | FBgn0011260 | INTRON                                            | NA                    | 12.46               |
| chrM_2l_14013222                      | bgm                | FBgn0027348 | UPSTREAM                                          | 525                   | 12.46               |



|                  |                |             |                                                |      |       |
|------------------|----------------|-------------|------------------------------------------------|------|-------|
| chrn_2l_14013222 | tRNA:Q:34E     | FBgn0028909 | UPSTREAM                                       | 2586 | 12.46 |
| chrn_3r_9889686  | foxo           | FBgn0038197 | INTRON                                         | NA   | 12.45 |
| chrn_2r_4270801  | pdm3           | FBgn0261588 | INTRON                                         | NA   | 12.42 |
| chrn_3r_22150509 | CG42765        | FBgn0261833 | UTR_3_PRIME                                    | NA   | 12.40 |
| chrn_3r_22762222 | sda            | FBgn0015541 | INTRON                                         | NA   | 12.32 |
| chrn_3r_22762340 | sda            | FBgn0015541 | INTRON                                         | NA   | 12.32 |
| chrn_2r_16437575 | Obp57d         | FBgn0043536 | UTR_5_PRIME                                    | NA   | 12.30 |
| chrn_2r_16437575 | Cpr57A         | FBgn0034517 | UTR_5_PRIME                                    | NA   | 12.30 |
| chrn_3r_22759527 | sda            | FBgn0015541 | INTRON                                         | NA   | 12.28 |
| chrn_3r_11453171 |                |             | SNP is more than 5000 bp away from known genes | NA   | 12.25 |
| chrn_3l_22652231 |                |             | SNP is more than 5000 bp away from known genes | NA   | 12.24 |
| chrn_3r_8126925  | svp            | FBgn0003651 | UTR_3_PRIME                                    | NA   | 12.16 |
| chrn_2r_9977354  | Prosap         | FBgn0040752 | INTRON                                         | NA   | 12.06 |
| chrn_2r_9977388  | Prosap         | FBgn0040752 | INTRON                                         | NA   | 12.06 |
| chrn_2r_17406887 | CG30288        | FBgn0050288 | NON_SYNONYMOUS_CODING                          | NA   | 11.98 |
| chrn_2r_17406888 | CG30288        | FBgn0050288 | SYNONYMOUS_CODING                              | NA   | 11.98 |
| chrn_2r_17406891 | CG30288        | FBgn0050288 | SYNONYMOUS_CODING                              | NA   | 11.98 |
| chrn_3r_20321322 | nAcRalpha-96Ab | FBgn0000039 | DOWNSTREAM                                     | 4447 | 11.92 |
| chrn_2l_15607491 | CG15255        | FBgn0028950 | DOWNSTREAM                                     | 3241 | 11.92 |
| chrn_3r_24833255 | CG1443         | FBgn0039620 | INTRON                                         | NA   | 11.90 |
| chrn_3r_1655708  | CG1208         | FBgn0037386 | UPSTREAM                                       | 1642 | 11.89 |
| chrn_3r_1655708  | glob3          | FBgn0037385 | UPSTREAM                                       | 76   | 11.89 |
| chrn_3r_23456407 | Tusp           | FBgn0039530 | SYNONYMOUS_CODING                              | NA   | 11.89 |
| chrn_2r_9580801  | CG6220         | FBgn0033865 | UTR_5_PRIME                                    | NA   | 11.89 |
| chrn_2r_9580819  | CG6220         | FBgn0033865 | UTR_5_PRIME                                    | NA   | 11.89 |
| chrn_3l_10798454 | CG12523        | FBgn0036102 | DOWNSTREAM                                     | 3253 | 11.88 |
| chrn_3r_14037670 | CG7985         | FBgn0028499 | INTRON                                         | NA   | 11.88 |
| chrn_2r_16437573 | Obp57d         | FBgn0043536 | UTR_5_PRIME                                    | NA   | 11.79 |
| chrn_2r_16437573 | Cpr57A         | FBgn0034517 | UTR_5_PRIME                                    | NA   | 11.79 |
| chrn_3l_16206905 | CG13073        | FBgn0036577 | NON_SYNONYMOUS_CODING                          | NA   | 11.75 |
| chrn_3r_14037792 | CG7985         | FBgn0028499 | INTRON                                         | NA   | 11.72 |
| chrn_3r_20317482 | nAcRalpha-96Ab | FBgn0000039 | DOWNSTREAM                                     | 607  | 11.69 |
| chrn_3r_20317482 | mir-1017       | FBgn0262389 | DOWNSTREAM                                     | 3078 | 11.69 |
| chrn_3r_12896218 | ns1            | FBgn0038473 | DOWNSTREAM                                     | 27   | 11.66 |
| chrn_3r_12896218 | Dad            | FBgn0020493 | DOWNSTREAM                                     | 83   | 11.66 |
| chrn_2r_12282635 | Sema-2b        | FBgn0264273 | INTRON                                         | NA   | 11.61 |
| chrn_3r_1784495  | CG11373        | FBgn0040679 | DOWNSTREAM                                     | 1550 | 11.59 |
| chrn_2l_7586341  | Spn7           | FBgn0083141 | DOWNSTREAM                                     | 3007 | 11.54 |
| chrn_3l_16207076 | CG13073        | FBgn0036577 | NON_SYNONYMOUS_CODING                          | NA   | 11.53 |
| chrn_3r_24974551 | Pglym78        | FBgn0014869 | INTRON                                         | NA   | 11.53 |
| chrn_2r_9580820  | CG6220         | FBgn0033865 | UTR_5_PRIME                                    | NA   | 11.53 |

|                  |                |             |                                                |      |       |
|------------------|----------------|-------------|------------------------------------------------|------|-------|
| chrM_3r_17234756 | CheB93b        | FBgn0051438 | UPSTREAM                                       | 89   | 11.48 |
| chrM_3r_17234756 | CheB93a        | FBgn0038888 | DOWNSTREAM                                     | 710  | 11.48 |
| chrM_2r_7755346  | CR42532        | FBgn0260437 | DOWNSTREAM                                     | 262  | 11.45 |
| chrM_2r_7755346  | CG13185        | FBgn0033661 | DOWNSTREAM                                     | 35   | 11.45 |
| chrM_3r_10604164 | jvl            | FBgn0263929 | INTRON                                         | NA   | 11.44 |
| chrM_3r_17199596 | mod(mdg4)      | FBgn0002781 | INTRON                                         | NA   | 11.43 |
| chrM_3r_15422589 | Dys            | FBgn0260003 | DOWNSTREAM                                     | 1472 | 11.42 |
| chrM_3r_15422589 | Cpr92A         | FBgn0038714 | DOWNSTREAM                                     | 635  | 11.42 |
| chrM_3r_20331821 | nAcRbeta-96A   | FBgn0004118 | DOWNSTREAM                                     | 3116 | 11.41 |
| chrM_3r_17634951 | CASK           | FBgn0013759 | INTRON                                         | NA   | 11.41 |
| chrM_3l_10045451 | dpr6           | FBgn0040823 | INTRON                                         | NA   | 11.41 |
| chrM_3r_1780242  |                |             | SNP is more than 5000 bp away from known genes | NA   | 11.40 |
| chrM_3r_26182438 | hdc            | FBgn0010113 | INTRON                                         | NA   | 11.39 |
| chrM_x_5028928   | rg             | FBgn0086911 | INTRON                                         | NA   | 11.38 |
| chrM_3r_9880633  | foxo           | FBgn0038197 | UPSTREAM                                       | 2057 | 11.32 |
| chrM_3r_25526492 | dmrt99B        | FBgn0039683 | DOWNSTREAM                                     | 3745 | 11.32 |
| chrM_2r_19526189 | retn           | FBgn0004795 | INTRON                                         | NA   | 11.31 |
| chrM_2r_16802118 | Rx             | FBgn0020617 | UPSTREAM                                       | 2167 | 11.30 |
| chrM_2r_16802118 | CG9235         | FBgn0034560 | DOWNSTREAM                                     | 3805 | 11.30 |
| chrM_3r_16174327 | Ir92a          | FBgn0038789 | DOWNSTREAM                                     | 4703 | 11.28 |
| chrM_3l_3112460  | CG14955        | FBgn0035399 | SYNONYMOUS_CODING                              | NA   | 11.28 |
| chrM_2r_18533385 | CG2852         | FBgn0034753 | INTRON                                         | NA   | 11.26 |
| chrM_3l_22678550 | CG14455        | FBgn0037175 | DOWNSTREAM                                     | 910  | 11.23 |
| chrM_3l_22678550 | CG14456        | FBgn0037176 | UPSTREAM                                       | 1772 | 11.23 |
| chrM_2r_7754966  | CG13185        | FBgn0033661 | DOWNSTREAM                                     | 415  | 11.23 |
| chrM_2r_7754966  | Damm           | FBgn0033659 | UPSTREAM                                       | 1078 | 11.23 |
| chrM_2r_17406122 | CG10494        | FBgn0034634 | SYNONYMOUS_CODING                              | NA   | 11.22 |
| chrM_3r_11875006 | ird5           | FBgn0024222 | NON_SYNONYMOUS_CODING                          | NA   | 11.22 |
| chrM_2r_8926920  |                |             | SNP is more than 5000 bp away from known genes | NA   | 11.20 |
| chrM_2l_6905242  | neuroligin     | FBgn0031866 | SYNONYMOUS_CODING                              | NA   | 11.20 |
| chrM_3r_20317663 | mir-1017       | FBgn0262389 | DOWNSTREAM                                     | 3259 | 11.20 |
| chrM_3r_20317663 | nAcRalpha-96Ab | FBgn0000039 | DOWNSTREAM                                     | 788  | 11.20 |
| chrM_2r_7755499  | CG13185        | FBgn0033661 | UTR_3_PRIME                                    | NA   | 11.19 |
| chrM_2r_5309507  | CG13955        | FBgn0033412 | UTR_3_PRIME                                    | NA   | 11.18 |
| chrM_2r_5309558  | CG13955        | FBgn0033412 | UTR_3_PRIME                                    | NA   | 11.12 |
| chrM_2r_5309516  | CG13955        | FBgn0033412 | UTR_3_PRIME                                    | NA   | 11.11 |
| chrM_3r_21760732 | CcapR          | FBgn0039396 | INTRON                                         | NA   | 11.09 |
| chrM_3r_20317278 | mir-1017       | FBgn0262389 | DOWNSTREAM                                     | 2874 | 11.08 |
| chrM_3r_20317278 | nAcRalpha-96Ab | FBgn0000039 | DOWNSTREAM                                     | 403  | 11.08 |
| chrM_2l_16357459 | CG4455         | FBgn0028506 | DOWNSTREAM                                     | 2920 | 11.08 |
| chrM_2l_16357459 | CaBP1          | FBgn0025678 | UPSTREAM                                       | 725  | 11.08 |

|                |              |             |                                                |      |       |
|----------------|--------------|-------------|------------------------------------------------|------|-------|
| chr31_9582091  | CG42673      | FBgn0261555 | INTRON                                         | NA   | 11.07 |
| chrX_14434961  |              |             | SNP is more than 5000 bp away from known genes | NA   | 11.04 |
| chr31_3480897  | CG42324      | FBgn0259224 | INTRON                                         | NA   | 11.03 |
| chr3r_22170308 | CG6036       | FBgn0039421 | SYNONYMOUS_CODING                              | NA   | 10.99 |
| chr3r_25469389 | DopR2        | FBgn0015129 | INTRON                                         | NA   | 10.97 |
| chr3r_24838734 | CG1443       | FBgn0039620 | INTRON                                         | NA   | 10.97 |
| chr2r_16715238 | sktl         | FBgn0016984 | UTR_3_PRIME                                    | NA   | 10.96 |
| chr31_6526677  | sfl          | FBgn0020251 | INTRON                                         | NA   | 10.96 |
| chr3r_22150945 | CG42765      | FBgn0261833 | SYNONYMOUS_CODING                              | NA   | 10.96 |
| chr3r_22153499 | CG33970      | FBgn0053970 | INTRON                                         | NA   | 10.96 |
| chr3r_21773493 | CcapR        | FBgn0039396 | INTRON                                         | NA   | 10.95 |
| chr31_3480886  | CG42324      | FBgn0259224 | INTRON                                         | NA   | 10.93 |
| chr2l_12157628 | CG31760      | FBgn0051760 | INTRON                                         | NA   | 10.92 |
| chr3r_9876056  |              |             | SNP is more than 5000 bp away from known genes | NA   | 10.92 |
| chr3r_9877316  |              |             | SNP is more than 5000 bp away from known genes | NA   | 10.92 |
| chr31_3798591  | CG32264      | FBgn0052264 | INTRON                                         | NA   | 10.91 |
| chr2r_7659759  | ths          | FBgn0033652 | INTRON                                         | NA   | 10.90 |
| chr2r_14511905 | Atg7         | FBgn0034366 | SYNONYMOUS_CODING                              | NA   | 10.87 |
| chr31_3480920  | CG42324      | FBgn0259224 | INTRON                                         | NA   | 10.86 |
| chr3r_11913419 | Mhcl         | FBgn0026059 | INTRON                                         | NA   | 10.86 |
| chr2l_17541695 | CR43304      | FBgn0262996 | UPSTREAM                                       | 159  | 10.85 |
| chr31_22669025 | CG14457      | FBgn0037174 | INTRON                                         | NA   | 10.84 |
| chr31_12975803 |              |             | SNP is more than 5000 bp away from known genes | NA   | 10.82 |
| chr3r_9875626  |              |             | SNP is more than 5000 bp away from known genes | NA   | 10.82 |
| chr2l_7581515  | CG13791      | FBgn0031923 | UPSTREAM                                       | 2956 | 10.81 |
| chr2l_7581515  | Spn7         | FBgn0083141 | UPSTREAM                                       | 417  | 10.81 |
| chr3r_20324384 |              |             | SNP is more than 5000 bp away from known genes | NA   | 10.77 |
| chr3r_8152616  | CG10013      | FBgn0038012 | DOWNSTREAM                                     | 1680 | 10.75 |
| chr3r_8152616  | tRNA:CR31432 | FBgn0051432 | UPSTREAM                                       | 4260 | 10.75 |
| chr3r_9875628  |              |             | SNP is more than 5000 bp away from known genes | NA   | 10.75 |
| chr3r_9880410  | foxo         | FBgn0038197 | UPSTREAM                                       | 2280 | 10.74 |
| chr31_22668986 | CG14457      | FBgn0037174 | INTRON                                         | NA   | 10.72 |
| chr31_16755248 | Nrt          | FBgn0004108 | UPSTREAM                                       | 3924 | 10.72 |
| chr3r_17161541 | CG16791      | FBgn0038881 | INTRON                                         | NA   | 10.72 |
| chr31_10318672 |              |             | SNP is more than 5000 bp away from known genes | NA   | 10.71 |
| chr2r_7754671  | Damm         | FBgn0033659 | UPSTREAM                                       | 783  | 10.69 |
| chr2r_7754671  | CG13185      | FBgn0033661 | DOWNSTREAM                                     | 710  | 10.69 |
| chr3r_22106946 | CG6154       | FBgn0039420 | DOWNSTREAM                                     | 4174 | 10.66 |

|                  |                |             |                                                |      |       |
|------------------|----------------|-------------|------------------------------------------------|------|-------|
| chrM_3r_14692992 |                |             | SNP is more than 5000 bp away from known genes | NA   | 10.64 |
| chrM_3r_22106984 | CG6154         | FBgn0039420 | DOWNSTREAM                                     | 4212 | 10.63 |
| chrM_3l_10045569 | dpr6           | FBgn0040823 | INTRON                                         | NA   | 10.61 |
| chrM_3r_22105138 | CG6154         | FBgn0039420 | DOWNSTREAM                                     | 2366 | 10.60 |
| chrM_2r_5255470  | CG13954        | FBgn0033405 | INTRON                                         | NA   | 10.59 |
| chrM_2r_17405453 | CG10494        | FBgn0034634 | INTRON                                         | NA   | 10.58 |
| chrM_2r_10210389 | Shroom         | FBgn0085408 | INTRON                                         | NA   | 10.54 |
| chrM_3r_26182554 | hdc            | FBgn0010113 | INTRON                                         | NA   | 10.54 |
| chrM_3r_14502909 | CG7705         | FBgn0038639 | NON_SYNONYMOUS_CODING                          | NA   | 10.54 |
| chrM_3r_9879517  | foxo           | FBgn0038197 | UPSTREAM                                       | 3173 | 10.54 |
| chrM_2r_16800044 | CG9235         | FBgn0034560 | DOWNSTREAM                                     | 1731 | 10.52 |
| chrM_2r_16800044 | Rx             | FBgn0020617 | UPSTREAM                                       | 4241 | 10.52 |
| chrM_3l_16241481 | CG13055        | FBgn0036583 | DOWNSTREAM                                     | 1179 | 10.51 |
| chrM_3r_20320839 | nAcRalpha-96Ab | FBgn0000039 | DOWNSTREAM                                     | 3964 | 10.49 |
| chrM_3r_20320840 | nAcRalpha-96Ab | FBgn0000039 | DOWNSTREAM                                     | 3965 | 10.49 |
| chrM_3r_20321267 | nAcRalpha-96Ab | FBgn0000039 | DOWNSTREAM                                     | 4392 | 10.49 |
| chrM_2r_7649214  |                |             | SNP is more than 5000 bp away from known genes | NA   | 10.48 |
| chrM_3l_2793655  | CG43444        | FBgn0263392 | SYNONYMOUS_CODING                              | NA   | 10.48 |
| chrM_3r_20321790 | nAcRalpha-96Ab | FBgn0000039 | DOWNSTREAM                                     | 4915 | 10.48 |
| chrM_3l_22885113 | slif           | FBgn0037203 | NON_SYNONYMOUS_CODING                          | NA   | 10.47 |
| chrM_3r_22761381 | sda            | FBgn0015541 | INTRON                                         | NA   | 10.44 |
| chrM_3l_3122546  | prominin-like  | FBgn0026189 | INTRON                                         | NA   | 10.44 |
| chrM_2l_17538006 | CR43304        | FBgn0262996 | UPSTREAM                                       | 3848 | 10.44 |
| chrM_3r_6122742  | CG43143        | FBgn0262617 | SYNONYMOUS_CODING                              | NA   | 10.43 |
| chrM_3r_22078656 | CR42745        | FBgn0261708 | DOWNSTREAM                                     | 2    | 10.43 |
| chrM_3r_22078656 | Ald            | FBgn0000064 | DOWNSTREAM                                     | 3032 | 10.43 |
| chrM_3r_22078711 | Ald            | FBgn0000064 | DOWNSTREAM                                     | 2977 | 10.43 |
| chrM_3r_22078711 | CR42745        | FBgn0261708 | DOWNSTREAM                                     | 57   | 10.43 |
| chrM_3l_14838510 | CG17839        | FBgn0036454 | INTRON                                         | NA   | 10.43 |
| chrM_x_17577242  | chas           | FBgn0263258 | INTRON                                         | NA   | 10.42 |
| chrM_3r_1783135  | CG11373        | FBgn0040679 | DOWNSTREAM                                     | 2910 | 10.41 |
| chrM_2l_4796273  | CG3294         | FBgn0031628 | INTRON                                         | NA   | 10.40 |
| chrM_3l_16243525 | CG13055        | FBgn0036583 | UTR_3_PRIME                                    | NA   | 10.39 |
| chrM_2l_16371899 | jhamt          | FBgn0028841 | DOWNSTREAM                                     | 4922 | 10.38 |
| chrM_3l_18067744 | CG34252        | FBgn0085281 | UPSTREAM                                       | 1262 | 10.37 |
| chrM_3r_10489240 | CG3509         | FBgn0038252 | UTR_5_PRIME                                    | NA   | 10.34 |
| chrM_3r_1785474  | CG11373        | FBgn0040679 | DOWNSTREAM                                     | 571  | 10.32 |
| chrM_2r_7602270  | pyr            | FBgn0033649 | INTRON                                         | NA   | 10.32 |
| chrM_2l_4025345  |                |             | SNP is more than 5000 bp away from known genes | NA   | 10.32 |

|                  |                |             |                                                |      |       |
|------------------|----------------|-------------|------------------------------------------------|------|-------|
| chrM_3r_7928167  | dpr17          | FBgn0051361 | INTRON                                         | NA   | 10.31 |
| chrM_3l_12075501 | Sema-5c        | FBgn0250876 | UPSTREAM                                       | 616  | 10.31 |
| chrM_3r_20324392 |                |             | SNP is more than 5000 bp away from known genes | NA   | 10.29 |
| chrM_3r_10603802 | jvl            | FBgn0263929 | INTRON                                         | NA   | 10.28 |
| chrM_3r_17217074 | bap            | FBgn0004862 | DOWNSTREAM                                     | 903  | 10.28 |
| chrM_2r_7755638  | CG13185        | FBgn0033661 | UTR_3_PRIME                                    | NA   | 10.27 |
| chrM_3r_20323340 |                |             | SNP is more than 5000 bp away from known genes | NA   | 10.26 |
| chrM_2l_1630242  |                |             | SNP is more than 5000 bp away from known genes | NA   | 10.24 |
| chrM_2r_10726987 | NaPi-T         | FBgn0016684 | DOWNSTREAM                                     | 3238 | 10.22 |
| chrM_3l_21779541 |                |             | SNP is more than 5000 bp away from known genes | NA   | 10.21 |
| chrM_2r_8199330  | CG30203        | FBgn0050203 | SYNONYMOUS_CODING                              | NA   | 10.21 |
| chrM_3l_16242135 | CG13055        | FBgn0036583 | DOWNSTREAM                                     | 525  | 10.20 |
| chrM_2r_7755021  | Damm           | FBgn0033659 | UPSTREAM                                       | 1133 | 10.20 |
| chrM_2r_7755021  | CG13185        | FBgn0033661 | DOWNSTREAM                                     | 360  | 10.20 |
| chrM_3r_16069675 | CG34139        | FBgn0083975 | INTRON                                         | NA   | 10.18 |
| chrM_2r_14514424 | sec6           | FBgn0034367 | SYNONYMOUS_CODING                              | NA   | 10.18 |
| chrM_2r_16799987 | Rx             | FBgn0020617 | UPSTREAM                                       | 4298 | 10.17 |
| chrM_2r_16799987 | CG9235         | FBgn0034560 | DOWNSTREAM                                     | 1674 | 10.17 |
| chrM_3r_19697594 | Pli            | FBgn0025574 | INTRON                                         | NA   | 10.16 |
| chrM_3r_7159978  | pros           | FBgn0004595 | INTRON                                         | NA   | 10.13 |
| chrM_3r_1776208  |                |             | SNP is more than 5000 bp away from known genes | NA   | 10.13 |
| chrM_2r_16955049 | Cht4           | FBgn0022700 | UPSTREAM                                       | 457  | 10.12 |
| chrM_2r_16955049 | Cht9           | FBgn0034582 | DOWNSTREAM                                     | 438  | 10.12 |
| chrM_3l_3511193  | ImpE2          | FBgn0001254 | UTR_3_PRIME                                    | NA   | 10.11 |
| chrM_3r_22088943 | CG6154         | FBgn0039420 | INTRON                                         | NA   | 10.10 |
| chrM_3r_24783133 | CG14521        | FBgn0039617 | INTRON                                         | NA   | 10.09 |
| chrM_2r_3800321  | CG30377        | FBgn0050377 | INTRON                                         | NA   | 10.09 |
| chrM_3r_6790523  |                |             | SNP is more than 5000 bp away from known genes | NA   | 10.08 |
| chrM_3r_20317618 | mir-1017       | FBgn0262389 | DOWNSTREAM                                     | 3214 | 10.08 |
| chrM_3r_20317618 | nAcRalpha-96Ab | FBgn0000039 | DOWNSTREAM                                     | 743  | 10.08 |
| chrM_3r_14038537 | CG7985         | FBgn0028499 | NON_SYNONYMOUS_CODING                          | NA   | 10.08 |
| chrM_3l_20857037 | CG32432        | FBgn0052432 | INTRON                                         | NA   | 10.07 |
| chrM_3l_11912960 | CG5718         | FBgn0036222 | DOWNSTREAM                                     | 2750 | 10.07 |
| chrM_3l_11912960 | CG11588        | FBgn0036221 | UPSTREAM                                       | 1653 | 10.07 |
| chrM_3r_17213559 | bap            | FBgn0004862 | UPSTREAM                                       | 1046 | 10.06 |
| chrM_2r_18435053 | px             | FBgn0003175 | INTRON                                         | NA   | 10.06 |
| chrM_2r_10019514 | Prosap         | FBgn0040752 | INTRON                                         | NA   | 10.06 |

**Supplementary Table 3e.** SNPs significantly associated with glycogen.

| Position<br>(Chromosome arm,<br>base) | Gene<br>symbol | FlyBase ID  | Site class                                        | Bases<br>from<br>gene | p-value<br>(-log10) |
|---------------------------------------|----------------|-------------|---------------------------------------------------|-----------------------|---------------------|
| chr <sub>m</sub> _2r_5672241          | CG1688         | FBgn0027589 | INTRON                                            | NA                    | 15.35               |
| chr <sub>m</sub> _2r_13547241         |                |             | SNP is more than 5000 bp away<br>from known genes | NA                    | 14.22               |
| chr <sub>m</sub> _2l_16179928         | Ca-alpha1D     | FBgn0001991 | INTRON                                            | NA                    | 14.01               |
| chr <sub>m</sub> _2l_1701762          | chinmo         | FBgn0086758 | UTR_3_PRIME                                       | NA                    | 13.99               |
| chr <sub>m</sub> _3r_8090545          | svp            | FBgn0003651 | INTRON                                            | NA                    | 13.92               |
| chr <sub>m</sub> _3r_8090560          | svp            | FBgn0003651 | INTRON                                            | NA                    | 13.92               |
| chr <sub>m</sub> _3r_8090059          | svp            | FBgn0003651 | INTRON                                            | NA                    | 13.80               |
| chr <sub>m</sub> _3l_14221223         | nuf            | FBgn0013718 | INTRON                                            | NA                    | 13.77               |
| chr <sub>m</sub> _3r_8090911          | svp            | FBgn0003651 | INTRON                                            | NA                    | 13.77               |
| chr <sub>m</sub> _2l_9442461          | numb           | FBgn0002973 | INTRON                                            | NA                    | 13.64               |
| chr <sub>m</sub> _2r_19178990         |                |             | SNP is more than 5000 bp away<br>from known genes | NA                    | 13.57               |
| chr <sub>m</sub> _3r_8087463          | svp            | FBgn0003651 | INTRON                                            | NA                    | 13.55               |
| chr <sub>m</sub> _2l_1357798          | CG5565         | FBgn0031335 | UPSTREAM                                          | 1874                  | 13.45               |
| chr <sub>m</sub> _2l_1357798          | CG31659        | FBgn0051659 | DOWNSTREAM                                        | 1127                  | 13.45               |
| chr <sub>m</sub> _2r_17814413         | Fili           | FBgn0085397 | INTRON                                            | NA                    | 13.41               |
| chr <sub>m</sub> _2l_13238126         | CG5867         | FBgn0027586 | INTRON                                            | NA                    | 13.40               |
| chr <sub>m</sub> _2r_14131654         |                |             | SNP is more than 5000 bp away<br>from known genes | NA                    | 13.28               |
| chr <sub>m</sub> _2l_4285760          | tutl           | FBgn0010473 | INTRON                                            | NA                    | 13.23               |
| chr <sub>m</sub> _2l_3750295          | CG10019        | FBgn0031568 | SYNONYMOUS_CODING                                 | NA                    | 13.18               |
| chr <sub>m</sub> _3r_9599438          | CG9297         | FBgn0038181 | INTRON                                            | NA                    | 13.15               |
| chr <sub>m</sub> _2l_13331663         | CG43778        | FBgn0264308 | UPSTREAM                                          | 542                   | 13.15               |
| chr <sub>m</sub> _2l_13151655         |                |             | SNP is more than 5000 bp away<br>from known genes | NA                    | 13.11               |
| chr <sub>m</sub> _3r_7834991          | KLHL18         | FBgn0037978 | INTRON                                            | NA                    | 13.09               |
| chr <sub>m</sub> _3l_5902828          | CG13288        | FBgn0035648 | SYNONYMOUS_CODING                                 | NA                    | 13.07               |
| chr <sub>m</sub> _3l_6255918          | ImpL3          | FBgn0001258 | UPSTREAM                                          | 124                   | 13.03               |
| chr <sub>m</sub> _3l_6255918          | CG10163        | FBgn0035697 | UPSTREAM                                          | 4058                  | 13.03               |
| chr <sub>m</sub> _2l_11353767         |                |             | SNP is more than 5000 bp away<br>from known genes | NA                    | 13.02               |
| chr <sub>m</sub> _2l_9719890          | Nckx30C        | FBgn0028704 | INTRON                                            | NA                    | 13.01               |
| chr <sub>m</sub> _2l_7341907          | Wnt6           | FBgn0031902 | INTRON                                            | NA                    | 12.93               |
| chr <sub>m</sub> _3l_1672550          | CG13930        | FBgn0035256 | SYNONYMOUS_CODING                                 | NA                    | 12.92               |
| chr <sub>m</sub> _3r_25141415         | Cnx99A         | FBgn0015622 | UTR_3_PRIME                                       | NA                    | 12.88               |
| chr <sub>m</sub> _2r_9657492          | Cpr50Ca        | FBgn0033867 | INTRON                                            | NA                    | 12.82               |
| chr <sub>m</sub> _2r_13571056         | CG42561        | FBgn0260763 | UPSTREAM                                          | 1167                  | 12.82               |
| chr <sub>m</sub> _2r_13571056         | Sema-1b        | FBgn0016059 | UPSTREAM                                          | 56                    | 12.82               |
| chr <sub>m</sub> _2l_13237948         | CG5867         | FBgn0027586 | INTRON                                            | NA                    | 12.81               |
| chr <sub>m</sub> _3r_24344229         | Dhc98D         | FBgn0013813 | INTRON                                            | NA                    | 12.75               |

|                  |            |             |                                                |      |       |
|------------------|------------|-------------|------------------------------------------------|------|-------|
| chrM_2L_16179908 | Ca-alpha1D | FBgn0001991 | INTRON                                         | NA   | 12.75 |
| chrM_3R_12687758 | msa        | FBgn0263610 | INTRON                                         | NA   | 12.71 |
| chrM_2R_16870322 | CG9313     | FBgn0034566 | SYNONYMOUS_CODING                              | NA   | 12.71 |
| chrM_3R_13125078 |            |             | SNP is more than 5000 bp away from known genes | NA   | 12.70 |
| chrM_3R_8084450  | CG3942     | FBgn0038008 | DOWNSTREAM                                     | 2136 | 12.69 |
| chrM_3R_8084450  | svp        | FBgn0003651 | UPSTREAM                                       | 21   | 12.69 |
| chrM_X_11068133  | CG1394     | FBgn0030277 | UPSTREAM                                       | 3452 | 12.64 |
| chrM_2R_18458956 | dnr1       | FBgn0260866 | INTRON                                         | NA   | 12.64 |
| chrM_3L_15770767 |            |             | SNP is more than 5000 bp away from known genes | NA   | 12.62 |
| chrM_2L_9671873  |            |             | SNP is more than 5000 bp away from known genes | NA   | 12.62 |
| chrM_2L_9671890  |            |             | SNP is more than 5000 bp away from known genes | NA   | 12.62 |
| chrM_2L_13228678 | CG16815    | FBgn0032491 | UPSTREAM                                       | 964  | 12.59 |
| chrM_2L_13228678 | CG16813    | FBgn0032490 | DOWNSTREAM                                     | 271  | 12.59 |
| chrM_2L_17814576 | CadN2      | FBgn0262018 | INTRON                                         | NA   | 12.58 |
| chrM_2L_7341286  | Wnt6       | FBgn0031902 | INTRON                                         | NA   | 12.58 |
| chrM_3L_5896481  | CG32413    | FBgn0052413 | INTRON                                         | NA   | 12.57 |
| chrM_2R_16939478 | shg        | FBgn0003391 | SYNONYMOUS_CODING                              | NA   | 12.56 |
| chrM_2L_9440580  | CG33723    | FBgn0053723 | SYNONYMOUS_CODING                              | NA   | 12.56 |
| chrM_2L_7339170  | Wnt6       | FBgn0031902 | INTRON                                         | NA   | 12.55 |
| chrM_2L_7339406  | Wnt6       | FBgn0031902 | INTRON                                         | NA   | 12.55 |
| chrM_2L_7339683  | Wnt6       | FBgn0031902 | INTRON                                         | NA   | 12.55 |
| chrM_2L_7339702  | Wnt6       | FBgn0031902 | INTRON                                         | NA   | 12.55 |
| chrM_2L_7341804  | Wnt6       | FBgn0031902 | INTRON                                         | NA   | 12.55 |
| chrM_2L_7341240  | Wnt6       | FBgn0031902 | INTRON                                         | NA   | 12.54 |
| chrM_2L_7356644  | Wnt6       | FBgn0031902 | DOWNSTREAM                                     | 4102 | 12.53 |
| chrM_3L_11266076 |            |             | SNP is more than 5000 bp away from known genes | NA   | 12.52 |
| chrM_3R_22878347 | NepYr      | FBgn0004842 | INTRON                                         | NA   | 12.51 |
| chrM_2L_9436881  | RpS28-like | FBgn0085211 | INTRON                                         | NA   | 12.50 |
| chrM_2L_9437018  | RpS28-like | FBgn0085211 | SYNONYMOUS_CODING                              | NA   | 12.50 |
| chrM_2L_9437175  | RpS28-like | FBgn0085211 | NON_SYNONYMOUS_CODING                          | NA   | 12.50 |
| chrM_2R_9630118  | fas        | FBgn0000633 | INTRON                                         | NA   | 12.48 |
| chrM_3R_13491003 | CG14322    | FBgn0038532 | INTRON                                         | NA   | 12.47 |
| chrM_2L_8604840  | Sema-1a    | FBgn0011259 | INTRON                                         | NA   | 12.46 |
| chrM_3R_26750427 | Ptx1       | FBgn0020912 | INTRON                                         | NA   | 12.45 |
| chrM_2L_2435535  | dpp        | FBgn0000490 | INTRON                                         | NA   | 12.44 |
| chrM_3R_5439629  | CG8312     | FBgn0037720 | INTRON                                         | NA   | 12.42 |
| chrM_2L_13230915 | CG16815    | FBgn0032491 | DOWNSTREAM                                     | 195  | 12.41 |
| chrM_2L_13230915 | Prosalph6T | FBgn0032492 | UPSTREAM                                       | 1124 | 12.41 |
| chrM_2L_13230969 | CG16815    | FBgn0032491 | DOWNSTREAM                                     | 249  | 12.41 |
| chrM_2L_13230969 | Prosalph6T | FBgn0032492 | UPSTREAM                                       | 1070 | 12.41 |

|                  |            |             |                       |      |       |
|------------------|------------|-------------|-----------------------|------|-------|
| chrM_2L_13224805 | CG15480    | FBgn0032489 | SYNONYMOUS_CODING     | NA   | 12.38 |
| chrM_2L_13300620 | CG31729    | FBgn0051729 | SYNONYMOUS_CODING     | NA   | 12.35 |
| chrM_2L_18335794 | Fas3       | FBgn0000636 | INTRON                | NA   | 12.35 |
| chrM_2L_9440489  | CG33723    | FBgn0053723 | NON_SYNONYMOUS_CODING | NA   | 12.34 |
| chrM_2L_9441322  | numb       | FBgn0002973 | INTRON                | NA   | 12.34 |
| chrM_2L_9442020  | numb       | FBgn0002973 | INTRON                | NA   | 12.34 |
| chrM_2L_9442205  | numb       | FBgn0002973 | INTRON                | NA   | 12.34 |
| chrM_3L_15066795 | cp309      | FBgn0086690 | INTRON                | NA   | 12.34 |
| chrM_3R_11617903 | c(3)G      | FBgn0000246 | NON_SYNONYMOUS_CODING | NA   | 12.33 |
| chrM_3R_11619250 | Acyp2      | FBgn0038363 | DOWNSTREAM            | 134  | 12.33 |
| chrM_3R_11619250 | wah        | FBgn0262527 | UPSTREAM              | 275  | 12.33 |
| chrM_3R_11619668 | wah        | FBgn0262527 | UTR_5_PRIME           | NA   | 12.33 |
| chrM_2L_7340121  | Wnt6       | FBgn0031902 | INTRON                | NA   | 12.33 |
| chrM_2L_9442387  | numb       | FBgn0002973 | INTRON                | NA   | 12.32 |
| chrM_3R_7651045  | CG6959     | FBgn0037956 | INTRON                | NA   | 12.31 |
| chrM_2L_2546748  | CG3515     | FBgn0031431 | DOWNSTREAM            | 4396 | 12.30 |
| chrM_2L_13228575 | CG16813    | FBgn0032490 | DOWNSTREAM            | 168  | 12.30 |
| chrM_2L_13228575 | CG16815    | FBgn0032491 | UPSTREAM              | 1067 | 12.30 |
| chrM_2L_13228583 | CG16815    | FBgn0032491 | UPSTREAM              | 1059 | 12.30 |
| chrM_2L_13228583 | CG16813    | FBgn0032490 | DOWNSTREAM            | 176  | 12.30 |
| chrM_2L_13106310 | CG5142     | FBgn0032470 | UPSTREAM              | 561  | 12.29 |
| chrM_2L_13106330 | CG5142     | FBgn0032470 | UPSTREAM              | 541  | 12.29 |
| chrM_2R_5353777  | Camta      | FBgn0259234 | INTRON                | NA   | 12.29 |
| chrM_2L_9442402  | numb       | FBgn0002973 | INTRON                | NA   | 12.29 |
| chrM_2L_13207481 | Pect       | FBgn0032482 | INTRON                | NA   | 12.29 |
| chrM_2L_13208062 | Pect       | FBgn0032482 | INTRON                | NA   | 12.29 |
| chrM_2L_13208293 | Pect       | FBgn0032482 | SYNONYMOUS_CODING     | NA   | 12.29 |
| chrM_2L_13210238 | Pect       | FBgn0032482 | UTR_3_PRIME           | NA   | 12.29 |
| chrM_2L_13211137 | CG15482    | FBgn0032483 | SYNONYMOUS_CODING     | NA   | 12.29 |
| chrM_2L_13211524 | CG15482    | FBgn0032483 | SYNONYMOUS_CODING     | NA   | 12.29 |
| chrM_2L_13213641 | kek4       | FBgn0032484 | NON_SYNONYMOUS_CODING | NA   | 12.29 |
| chrM_2L_13213862 | kek4       | FBgn0032484 | SYNONYMOUS_CODING     | NA   | 12.29 |
| chrM_2L_13213996 | kek4       | FBgn0032484 | NON_SYNONYMOUS_CODING | NA   | 12.29 |
| chrM_2L_13224922 | CG15480    | FBgn0032489 | SYNONYMOUS_CODING     | NA   | 12.29 |
| chrM_2L_13225156 | CG15480    | FBgn0032489 | NON_SYNONYMOUS_CODING | NA   | 12.29 |
| chrM_2L_13225357 | CG15480    | FBgn0032489 | UPSTREAM              | 151  | 12.29 |
| chrM_2L_13225357 | CG16812    | FBgn0032488 | DOWNSTREAM            | 807  | 12.29 |
| chrM_2L_13228419 | CG16815    | FBgn0032491 | UPSTREAM              | 1223 | 12.29 |
| chrM_2L_13228419 | CG16813    | FBgn0032490 | DOWNSTREAM            | 12   | 12.29 |
| chrM_2L_13228557 | CG16815    | FBgn0032491 | UPSTREAM              | 1085 | 12.29 |
| chrM_2L_13228557 | CG16813    | FBgn0032490 | DOWNSTREAM            | 150  | 12.29 |
| chrM_2L_13229662 | CG16815    | FBgn0032491 | START_GAINED          | NA   | 12.29 |
| chrM_2L_13230959 | CG16815    | FBgn0032491 | DOWNSTREAM            | 239  | 12.26 |
| chrM_2L_13230959 | Prosalph6T | FBgn0032492 | UPSTREAM              | 1080 | 12.26 |



|                  |            |             |                                                |      |       |
|------------------|------------|-------------|------------------------------------------------|------|-------|
| chrM_2l_9437201  | RpS28-like | FBgn0085211 | UTR_3_PRIME                                    | NA   | 12.26 |
| chrM_2l_18203425 | CG42750    | FBgn0261804 | INTRON                                         | NA   | 12.26 |
| chrM_3r_11621027 | wah        | FBgn0262527 | SYNONYMOUS_CODING                              | NA   | 12.26 |
| chrM_2l_13195793 | Edem2      | FBgn0032480 | NON_SYNONYMOUS_CODING                          | NA   | 12.25 |
| chrM_2l_13314585 | CG43778    | FBgn0264308 | INTRON                                         | NA   | 12.24 |
| chrM_3r_11618661 | Acyp2      | FBgn0038363 | INTRON                                         | NA   | 12.23 |
| chrM_3l_15170441 |            |             | SNP is more than 5000 bp away from known genes | NA   | 12.22 |
| chrM_3r_26745576 | Ptx1       | FBgn0020912 | INTRON                                         | NA   | 12.22 |
| chrM_2l_13228742 | CG16813    | FBgn0032490 | DOWNSTREAM                                     | 335  | 12.22 |
| chrM_2l_13228742 | CG16815    | FBgn0032491 | UPSTREAM                                       | 900  | 12.22 |
| chrM_2l_13228654 | CG16815    | FBgn0032491 | UPSTREAM                                       | 988  | 12.22 |
| chrM_2l_13228654 | CG16813    | FBgn0032490 | DOWNSTREAM                                     | 247  | 12.22 |
| chrM_2l_13228904 | CG16813    | FBgn0032490 | DOWNSTREAM                                     | 497  | 12.22 |
| chrM_2l_13228904 | CG16815    | FBgn0032491 | UPSTREAM                                       | 738  | 12.22 |
| chrM_3l_3951603  | CG14984    | FBgn0035480 | INTRON                                         | NA   | 12.21 |
| chrM_x_21896622  | l(1)G0196  | FBgn0027279 | INTRON                                         | NA   | 12.20 |
| chrM_2l_2690903  | CG31690    | FBgn0051690 | INTRON                                         | NA   | 12.19 |
| chrM_2l_7338067  | Wnt6       | FBgn0031902 | INTRON                                         | NA   | 12.19 |
| chrM_2l_13311901 | CG43778    | FBgn0264308 | INTRON                                         | NA   | 12.18 |
| chrM_2l_13235256 | CG15479    | FBgn0032493 | UPSTREAM                                       | 623  | 12.17 |
| chrM_2l_13235256 | CG5867     | FBgn0027586 | UPSTREAM                                       | 1237 | 12.17 |
| chrM_3l_14220524 | nuf        | FBgn0013718 | INTRON                                         | NA   | 12.16 |
| chrM_3l_7751640  | CG32373    | FBgn0052373 | NON_SYNONYMOUS_CODING                          | NA   | 12.16 |
| chrM_x_21895406  | l(1)G0196  | FBgn0027279 | SYNONYMOUS_CODING                              | NA   | 12.16 |
| chrM_x_18070453  | Andorra    | FBgn0030898 | DOWNSTREAM                                     | 2106 | 12.16 |
| chrM_x_18070453  | Frq2       | FBgn0083228 | UPSTREAM                                       | 1192 | 12.16 |
| chrM_2l_16457967 | Idgf3      | FBgn0020414 | DOWNSTREAM                                     | 4791 | 12.16 |
| chrM_2l_13228978 | CG16815    | FBgn0032491 | UPSTREAM                                       | 664  | 12.15 |
| chrM_2l_13228978 | CG16813    | FBgn0032490 | DOWNSTREAM                                     | 571  | 12.15 |
| chrM_2l_13224925 | CG15480    | FBgn0032489 | SYNONYMOUS_CODING                              | NA   | 12.15 |
| chrM_2l_13207803 | Pect       | FBgn0032482 | INTRON                                         | NA   | 12.15 |
| chrM_2l_7337340  | Wnt6       | FBgn0031902 | INTRON                                         | NA   | 12.14 |
| chrM_2l_12371256 | bru-2      | FBgn0262475 | INTRON                                         | NA   | 12.14 |
| chrM_x_13772755  | mamo       | FBgn0263115 | INTRON                                         | NA   | 12.14 |
| chrM_3r_13032388 |            |             | SNP is more than 5000 bp away from known genes | NA   | 12.14 |
| chrM_3r_6320696  |            |             | SNP is more than 5000 bp away from known genes | NA   | 12.12 |
| chrM_3l_6262733  |            |             | SNP is more than 5000 bp away from known genes | NA   | 12.12 |
| chrM_3l_6262764  |            |             | SNP is more than 5000 bp away from known genes | NA   | 12.12 |
| chrM_2l_13301067 | CG31729    | FBgn0051729 | UTR_3_PRIME                                    | NA   | 12.12 |
| chrM_3r_22133524 |            |             | SNP is more than 5000 bp away                  | NA   | 12.11 |

|                               |         |             |                                                   |      |       |
|-------------------------------|---------|-------------|---------------------------------------------------|------|-------|
|                               |         |             | from known genes                                  |      |       |
| chr <sub>m</sub> _2l_6230925  | Ugt37b1 | FBgn0026755 | DOWNSTREAM                                        | 4083 | 12.11 |
| chr <sub>m</sub> _2l_13728140 | CG9014  | FBgn0028847 | UPSTREAM                                          | 4498 | 12.09 |
| chr <sub>m</sub> _2l_9672002  |         |             | SNP is more than 5000 bp away<br>from known genes | NA   | 12.08 |
| chr <sub>m</sub> _3r_11615466 | c(3)G   | FBgn0000246 | UTR_3_PRIME                                       | NA   | 12.07 |
| chr <sub>m</sub> _2r_11580458 | CG30087 | FBgn0050087 | SYNONYMOUS_CODING                                 | NA   | 12.07 |
| chr <sub>m</sub> _3l_10657107 | CG32068 | FBgn0052068 | INTRON                                            | NA   | 12.07 |

**Supplementary Table 4** Gene ontology (GO) assignments for genes significantly associated with microbiota-dependent phenotypic traits. The number of GO categories assigned to a trait depended on the SNPs in question: for example, there were many GO assignments to the TAG-associated list, driven in particular by SNPs in IIS/TOR genes (principally *Happyhour*) and regulators of transcription. By contrast, only two significant GO assignments were made to glucose content, driven by one gene (*slamdance*), indicating that the strong GO enrichment associated with other traits is not an artefact of the relatively large number of input SNPs

| GO category           | Adjusted P-value | GO description                                                                     | Associated genes |
|-----------------------|------------------|------------------------------------------------------------------------------------|------------------|
| <b>(a) Dry weight</b> |                  |                                                                                    |                  |
| GO:0090254            | 0.0355           | cell elongation involved in imaginal disc-derived wing morphogenesis               | tkv              |
| GO:0072663            | 0.0230           | establishment of protein localization to peroxisome                                | Pex1             |
| GO:0003840            | 0.0433           | gamma-glutamyltransferase activity                                                 | CG1492           |
| GO:0004466            | 0.0028           | long-chain-acyl-CoA dehydrogenase activity                                         | CG7461           |
| GO:0007140            | 0.0028           | male meiosis                                                                       | bol              |
| GO:0007127            | 0.0328           | meiosis I                                                                          | bol              |
| GO:0044771            | 0.0010           | meiotic cell cycle phase transition                                                | bol              |
| GO:0008315            | 0.0010           | meiotic G2/MI transition                                                           | bol              |
| GO:0005771            | 0.0318           | multivesicular body                                                                | tkv              |
| GO:0045705            | 0.0461           | negative regulation of salivary gland boundary specification                       | Abd-B<br>tkv     |
| GO:0016667            | 0.0010           | oxidoreductase activity, acting on a sulfur group of donors                        | SelR             |
| GO:0016671            | 0.0003           | oxidoreductase activity, acting on a sulfur group of donors, disulfide as acceptor | SelR             |
| GO:0033743            | 0.0003           | peptide-methionine (R)-S-oxide reductase activity                                  | SelR             |
| GO:0018206            | 0.0003           | peptidyl-methionine modification                                                   | SelR             |
| GO:0043204            | 0.0003           | perikaryon                                                                         | bol              |
| GO:0043574            | 0.0230           | peroxisomal transport                                                              | Pex1             |
| GO:0090068            | 0.0390           | positive regulation of cell cycle process                                          | bol              |
| GO:0045836            | 0.0003           | positive regulation of meiosis                                                     | bol              |
| GO:0072662            | 0.0230           | protein localization to peroxisome                                                 | Pex1             |
| GO:0006625            | 0.0230           | protein targeting to peroxisome                                                    | Pex1             |
| GO:0040020            | 0.0003           | regulation of meiosis                                                              | bol              |
| GO:0051445            | 0.0003           | regulation of meiotic cell cycle                                                   | bol              |
| GO:0045704            | 0.0461           | regulation of salivary gland boundary specification                                | Abd-B<br>tkv     |
| GO:0016246            | 0.0461           | RNA interference                                                                   | hdc<br>Tis11     |
| GO:0048137            | 0.0003           | spermatocyte division                                                              | Pex1<br>bol      |
| GO:0050431            | 0.0230           | transforming growth factor beta binding                                            | tkv              |
| GO:0005025            | 0.0250           | transforming growth factor beta receptor activity, type I                          | tkv              |
| GO:0007181            | 0.0230           | transforming growth factor beta receptor complex assembly                          | tkv              |
| GO:0005024            | 0.0318           | transforming growth factor beta-activated receptor activity                        | tkv              |
| GO:0004675            | 0.0318           | transmembrane receptor protein serine/threonine kinase activity                    | tkv              |
| GO:0009826            | 0.0308           | unidimensional cell growth                                                         | tkv<br>Dok       |

|                    |        |                                                       |                                                                                                                  |
|--------------------|--------|-------------------------------------------------------|------------------------------------------------------------------------------------------------------------------|
| GO:0017099         | 0.0008 | very-long-chain-acyl-CoA dehydrogenase activity       | CG7461                                                                                                           |
| <b>(b) protein</b> |        |                                                       |                                                                                                                  |
| GO:0031532         | 0.0361 | actin cytoskeleton reorganization                     | nuf                                                                                                              |
| GO:0008261         | 0.0003 | allatostatin receptor activity                        | AICR2                                                                                                            |
| GO:0021960         | 0.0139 | anterior commissure morphogenesis                     | hh                                                                                                               |
| GO:0048099         | 0.0344 | anterior/posterior lineage restriction, imaginal disc | hh                                                                                                               |
| GO:0061564         | 0.0037 | axon development                                      | trol<br>rut<br>tok<br>beat-1a<br>hh<br>EndoGI<br>msn<br>sm<br>stan<br>CG12717<br>Fas3<br>Sema-1a<br>Trim9<br>kuz |
| GO:0007411         | 0.0049 | axon guidance                                         | trol<br>tok<br>beat-1a<br>EndoGI<br>msn<br>sm<br>stan<br>Fas3<br>Sema-1a<br>Trim9<br>kuz                         |
| GO:0007409         | 0.0025 | axonogenesis                                          | trol<br>rut<br>tok<br>beat-1a<br>hh<br>EndoGI<br>msn<br>sm<br>stan<br>CG12717<br>Fas3<br>Sema-1a<br>Trim9<br>kuz |
| GO:0055034         | 0.0418 | Bolwig's organ development                            | beat-1a<br>hh                                                                                                    |
| GO:0001746         | 0.0418 | Bolwig's organ morphogenesis                          | beat-1a<br>hh                                                                                                    |
| GO:0007420         | 0.0013 | brain development                                     | hh<br>bun<br>ed<br>stan<br>Sema-1a                                                                               |
| GO:0016339         | 0.0115 | calcium-dependent cell-cell adhesion                  | stan<br>Fas3                                                                                                     |
| GO:0071013         | 0.0092 | catalytic step 2 spliceosome                          | CG13900                                                                                                          |
| GO:0060326         | 0.0037 | cell chemotaxis                                       | hh<br>wun                                                                                                        |
| GO:0000904         | 0.0324 | cell morphogenesis involved in differentiation        | trol<br>rut<br>tok<br>beat-1a<br>hh<br>EndoGI<br>msn                                                             |

|            |        |                                                       |                                                                                                                  |
|------------|--------|-------------------------------------------------------|------------------------------------------------------------------------------------------------------------------|
|            |        |                                                       | sm<br>stan<br>CG12717 Fas3<br>Sema-1a<br>Trim9<br>kuz                                                            |
| GO:0048667 | 0.0169 | cell morphogenesis involved in neuron differentiation | trol<br>rut<br>tok<br>beat-1a hh<br>EndoGI<br>msn<br>sm<br>stan<br>CG12717<br>Fas3<br>Sema-1a<br>Trim9<br>kuz    |
| GO:0032990 | 0.0486 | cell part morphogenesis                               | trol<br>rut<br>tok<br>beat-1a<br>hh<br>EndoGI<br>msn<br>sm<br>stan<br>CG12717<br>Fas3<br>Sema-1a<br>Trim9<br>kuz |
| GO:0048858 | 0.0486 | cell projection morphogenesis                         | trol<br>rut<br>tok<br>beat-1a<br>hh<br>EndoGI<br>msn<br>sm<br>stan<br>CG12717<br>Fas3<br>Sema-1a<br>Trim9<br>kuz |
| GO:0008037 | 0.0493 | cell recognition                                      | trol<br>tok<br>beat-1a<br>axo<br>stan<br>Fas3<br>Sema-1a<br>Trim9<br>kuz                                         |
| GO:0007166 | 0.0008 | cell surface receptor signaling pathway               | Proc-R<br>trol<br>rut<br>wek<br>hh<br>kek5<br>rdgA<br>bun<br>ed<br>EndoGI<br>aru<br>stan<br>Sema-1a              |

|            |        |                                                                     |                                                                                                                                                                                       |
|------------|--------|---------------------------------------------------------------------|---------------------------------------------------------------------------------------------------------------------------------------------------------------------------------------|
|            |        |                                                                     | Trim9<br>AICR2<br>kuz                                                                                                                                                                 |
| GO:0005911 | 0.0055 | cell-cell junction                                                  | vari<br>ed<br>wun<br>stan<br>Fas3                                                                                                                                                     |
| GO:0006928 | 0.0198 | cellular component movement                                         | trol<br>tok<br>beat-1a<br>apt<br>hh<br>bun<br>CG13636<br>EndoGI<br>msn<br>sm<br>wun<br>stan<br>Fas3<br>Sema-1a<br>Trim9<br>kuz                                                        |
| GO:0022412 | 0.0404 | cellular process involved in reproduction in multicellular organism | wek<br>apt<br>NA<br>hh<br>bun<br>CG13636<br>ed<br>wun<br>msi<br>Fas3<br>kuz                                                                                                           |
| GO:0051716 | 0.0301 | cellular response to stimulus                                       | Proc-R<br>elk<br>trol<br>rut<br>wek<br>CG14669<br>apt<br>hh<br>kek5<br>CG30158<br>rdgA<br>bun<br>ed<br>EndoGI<br>msn<br>aru<br>wun<br>msi<br>stan<br>Sema-1a<br>Trim9<br>AICR2<br>kuz |
| GO:0007417 | 0.0002 | central nervous system development                                  | apt<br>hh<br>bun<br>ed<br>stan<br>CG12717<br>Sema-1a<br>kuz                                                                                                                           |
| GO:0021955 | 0.0018 | central nervous system neuron axonogenesis                          | hh<br>CG12717                                                                                                                                                                         |

|            |        |                                                                          |                                                                                                                                        |
|------------|--------|--------------------------------------------------------------------------|----------------------------------------------------------------------------------------------------------------------------------------|
| GO:0021954 | 0.0024 | central nervous system neuron development                                | hh<br>CG12717                                                                                                                          |
| GO:0021953 | 0.0024 | central nervous system neuron differentiation                            | hh<br>CG12717                                                                                                                          |
| GO:0021952 | 0.0015 | central nervous system projection neuron axonogenesis                    | hh<br>CG12717                                                                                                                          |
| GO:0006935 | 0.0008 | chemotaxis                                                               | trol<br>tok<br>beat-1a<br>hh<br>EndoGI<br>msn<br>sm<br>wun<br>stan<br>Fas3<br>Sema-1a<br>Trim9<br>kuz                                  |
| GO:0008234 | 0.0325 | cysteine-type peptidase activity                                         | hh<br>CG12717                                                                                                                          |
| GO:0003684 | 0.0002 | damaged DNA binding                                                      | CG13900                                                                                                                                |
| GO:0070593 | 0.0027 | dendrite self-avoidance                                                  | stan                                                                                                                                   |
| GO:0004175 | 0.0161 | endopeptidase activity                                                   | tok<br>CG5527<br>hh<br>kuz                                                                                                             |
| GO:0030900 | 0.0139 | forebrain development                                                    | hh                                                                                                                                     |
| GO:0004930 | 0.0316 | G-protein coupled receptor activity                                      | Proc-R<br>stan<br>AICR2                                                                                                                |
| GO:0035232 | 0.0404 | germ cell attraction                                                     | hh                                                                                                                                     |
| GO:0035233 | 0.0117 | germ cell repulsion                                                      | wun                                                                                                                                    |
| GO:0008347 | 0.0090 | glial cell migration                                                     | hh<br>kuz                                                                                                                              |
| GO:0060914 | 0.0288 | heart formation                                                          | hh                                                                                                                                     |
| GO:0003007 | 0.0008 | heart morphogenesis                                                      | hh<br>kuz                                                                                                                              |
| GO:0042802 | 0.0117 | identical protein binding                                                | bru-3<br>wek<br>bun<br>Pdp1<br>wun                                                                                                     |
| GO:0016539 | 0.0114 | intein-mediated protein splicing                                         | hh                                                                                                                                     |
| GO:0040011 | 0.0347 | locomotion                                                               | trol<br>tok<br>beat-1a<br>apt<br>hh<br>rdgA<br>bun<br>CG13636<br>EndoGI<br>msn<br>sm<br>wun<br>stan<br>Fas3<br>Sema-1a<br>Trim9<br>kuz |
| GO:0007311 | 0.0002 | maternal specification of dorsal/ventral axis, oocyte, germ-line encoded | wek                                                                                                                                    |
| GO:0006509 | 0.0002 | membrane protein ectodomain proteolysis                                  | kuz                                                                                                                                    |
| GO:0033619 | 0.0002 | membrane protein proteolysis                                             | kuz                                                                                                                                    |
| GO:0004222 | 0.0018 | metalloendopeptidase activity                                            | tok<br>CG5527                                                                                                                          |

|            |        |                                                       |                                                                                                                  |
|------------|--------|-------------------------------------------------------|------------------------------------------------------------------------------------------------------------------|
|            |        |                                                       | kuz                                                                                                              |
| GO:0008237 | 0.0417 | metallopeptidase activity                             | tok<br>CG5527<br>kuz                                                                                             |
| GO:0016319 | 0.0060 | mushroom body development                             | bun<br>ed<br>stan                                                                                                |
| GO:0030178 | 0.0300 | negative regulation of Wnt receptor signaling pathway | stan                                                                                                             |
| GO:0014017 | 0.0417 | neuroblast fate commitment                            | kuz                                                                                                              |
| GO:0007400 | 0.0271 | neuroblast fate determination                         | kuz                                                                                                              |
| GO:0097485 | 0.0055 | neuron projection guidance                            | trol<br>tok<br>beat-1a<br>EndoGI<br>msn<br>sm<br>stan<br>Fas3<br>Sema-1a<br>Trim9<br>kuz                         |
| GO:0048812 | 0.0404 | neuron projection morphogenesis                       | trol<br>rut<br>tok<br>beat-1a<br>hh<br>EndoGI<br>msn<br>sm<br>stan<br>CG12717<br>Fas3<br>Sema-1a<br>Trim9<br>kuz |
| GO:0008038 | 0.0491 | neuron recognition                                    | trol<br>tok<br>beat-1a<br>axo<br>stan<br>Fas3<br>Sema-1a<br>Trim9                                                |
| GO:0007218 | 0.0002 | neuropeptide signaling pathway                        | Proc-R<br>stan<br>AICR2                                                                                          |
| GO:0007220 | 0.0007 | Notch receptor processing                             | kuz                                                                                                              |
| GO:0007219 | 0.0329 | Notch signaling pathway                               | bun<br>EndoGI<br>kuz                                                                                             |
| GO:0070160 | 0.0218 | occluding junction                                    | vari<br>wun<br>Fas3                                                                                              |
| GO:0004984 | 0.0071 | olfactory receptor activity                           | AICR2                                                                                                            |
| GO:0030707 | 0.0440 | ovarian follicle cell development                     | apt<br>hh<br>bun<br>CG13636<br>ed<br>Fas3<br>kuz                                                                 |
| GO:0005113 | 0.0125 | patched binding                                       | hh                                                                                                               |
| GO:0061320 | 0.0066 | pericardial nephrocyte differentiation                | kuz                                                                                                              |
| GO:0007365 | 0.0018 | periodic partitioning                                 | hh<br>stan                                                                                                       |
| GO:0010647 | 0.0364 | positive regulation of cell communication             | trol<br>hh                                                                                                       |



|            |        |                                                                |                                     |
|------------|--------|----------------------------------------------------------------|-------------------------------------|
|            |        |                                                                | EndoGI<br>stan                      |
| GO:0007228 | 0.0449 | positive regulation of hh target transcription factor activity | hh                                  |
| GO:0009967 | 0.0300 | positive regulation of signal transduction                     | trol<br>hh<br>EndoGI<br>stan        |
| GO:0023056 | 0.0320 | positive regulation of signaling                               | trol<br>hh<br>EndoGI<br>stan        |
| GO:0030177 | 0.0023 | positive regulation of Wnt receptor signaling pathway          | stan                                |
| GO:0071011 | 0.0172 | precatalytic spliceosome                                       | CG13900                             |
| GO:0016540 | 0.0273 | protein autoprocessing                                         | hh                                  |
| GO:0042803 | 0.0065 | protein homodimerization activity                              | bru-3<br>wek<br>bun<br>Pdp1<br>wun  |
| GO:0030908 | 0.0114 | protein splicing                                               | hh                                  |
| GO:0048057 | 0.0002 | R3/R4 development                                              | stan                                |
| GO:0005057 | 0.0316 | receptor signaling protein activity                            | msn stan                            |
| GO:0090066 | 0.0006 | regulation of anatomical structure size                        | vari<br>stan<br>Sema-1a<br>kuz      |
| GO:0030516 | 0.0320 | regulation of axon extension                                   | kuz                                 |
| GO:0050770 | 0.0002 | regulation of axonogenesis                                     | stan<br>Sema-1a<br>kuz              |
| GO:0060284 | 0.0440 | regulation of cell development                                 | bun<br>ed<br>stan<br>Sema-1a<br>kuz |
| GO:0001558 | 0.0198 | regulation of cell growth                                      | bun<br>kuz                          |
| GO:0022604 | 0.0025 | regulation of cell morphogenesis                               | ed<br>msn<br>stan<br>Sema-1a<br>kuz |
| GO:0010769 | 0.0003 | regulation of cell morphogenesis involved in differentiation   | stan<br>Sema-1a<br>kuz              |
| GO:0031344 | 0.0007 | regulation of cell projection organization                     | stan<br>Sema-1a<br>kuz              |
| GO:0008361 | 0.0209 | regulation of cell size                                        | Sema-1a<br>kuz                      |
| GO:0032535 | 0.0347 | regulation of cellular component size                          | Sema-1a<br>kuz                      |
| GO:0090175 | 0.0092 | regulation of establishment of planar polarity                 | stan                                |
| GO:0061387 | 0.0320 | regulation of extent of cell growth                            | kuz                                 |
| GO:0051960 | 0.0092 | regulation of nervous system development                       | bun<br>ed<br>stan<br>Sema-1a<br>kuz |
| GO:0050767 | 0.0007 | regulation of neurogenesis                                     | bun<br>ed<br>stan<br>Sema-1a<br>kuz |
| GO:0045664 | 0.0028 | regulation of neuron differentiation                           | stan                                |

|            |        |                                                 |                                                                                                                                                   |
|------------|--------|-------------------------------------------------|---------------------------------------------------------------------------------------------------------------------------------------------------|
|            |        |                                                 | Sema-1a<br>kuz                                                                                                                                    |
| GO:0010975 | 0.0003 | regulation of neuron projection development     | stan<br>Sema-1a<br>kuz                                                                                                                            |
| GO:0035386 | 0.0002 | regulation of Roundabout signaling pathway      | kuz                                                                                                                                               |
| GO:0035159 | 0.0023 | regulation of tube length, open tracheal system | vari<br>stan                                                                                                                                      |
| GO:0035150 | 0.0117 | regulation of tube size                         | vari<br>stan                                                                                                                                      |
| GO:0035151 | 0.0057 | regulation of tube size, open tracheal system   | vari<br>stan                                                                                                                                      |
| GO:0042221 | 0.0347 | response to chemical stimulus                   | trol<br>rut<br>tok<br>beat-1a<br>apt<br>hh<br>Pdp1<br>EndoGI<br>msn<br>wtrw<br>sm<br>aru<br>wun<br>msi<br>stan<br>Fas3<br>Sema-1a<br>Trim9<br>kuz |
| GO:0009605 | 0.0169 | response to external stimulus                   | trol<br>tok<br>beat-1a<br>hh<br>rdgA<br>Pdp1<br>EndoGI<br>msn<br>sm<br>wun<br>stan<br>Fas3<br>Sema-1a<br>Trim9<br>kuz                             |
| GO:0030529 | 0.0323 | ribonucleoprotein complex                       | CG13900<br>sm<br>aru                                                                                                                              |
| GO:0035385 | 0.0018 | Roundabout signaling pathway                    | kuz                                                                                                                                               |
| GO:0007367 | 0.0004 | segment polarity determination                  | hh<br>stan                                                                                                                                        |
| GO:0071526 | 0.0418 | semaphorin-plexin signaling pathway             | trol<br>Sema-1a                                                                                                                                   |
| GO:0005918 | 0.0139 | septate junction                                | vari<br>wun<br>Fas3                                                                                                                               |
| GO:0019991 | 0.0345 | septate junction assembly                       | vari<br>wun                                                                                                                                       |
| GO:0007165 | 0.0347 | signal transduction                             | Proc-R<br>elk<br>trol<br>rut<br>wek<br>CG14669<br>apt<br>hh<br>kek5                                                                               |

|                |        |                                                                 |                                                                                                               |
|----------------|--------|-----------------------------------------------------------------|---------------------------------------------------------------------------------------------------------------|
|                |        |                                                                 | CG30158<br>rdgA<br>bun<br>ed<br>EndoGI<br>msn<br>aru<br>stan<br>Sema-1a<br>Trim9<br>AICR2<br>kuz              |
| GO:0007227     | 0.0449 | signal transduction downstream of<br>smoothened                 | hh                                                                                                            |
| GO:0030532     | 0.0002 | small nuclear ribonucleoprotein complex                         | CG13900                                                                                                       |
| GO:0004994     | 0.0002 | somatostatin receptor activity                                  | AICR2                                                                                                         |
| GO:0005681     | 0.0316 | spliceosomal complex                                            | CG13900                                                                                                       |
| GO:0048867     | 0.0440 | stem cell fate determination                                    | kuz                                                                                                           |
| GO:0008146     | 0.0094 | sulfotransferase activity                                       | CG9164                                                                                                        |
| GO:0042330     | 0.0018 | taxis                                                           | trol<br>tok<br>beat-la<br>hh<br>rdgA<br>EndoGI<br>msn<br>sm<br>wun<br>stan<br>Fas3<br>Sema-1a<br>Trim9<br>kuz |
| GO:0021537     | 0.0139 | telencephalon development                                       | hh                                                                                                            |
| GO:0016782     | 0.0109 | transferase activity, transferring sulfur-<br>containing groups | CG9164                                                                                                        |
| GO:0005686     | 0.0002 | U2 snRNP                                                        | CG13900                                                                                                       |
| GO:0031532     | 0.0361 | actin cytoskeleton reorganization                               | nuf                                                                                                           |
| GO:0008261     | 0.0003 | allatostatin receptor activity                                  | AICR2                                                                                                         |
| <b>(c) TAG</b> |        |                                                                 |                                                                                                               |
| GO:0003873     | 0.0040 | 6-phosphofructo-2-kinase activity                               | Pfrx                                                                                                          |
| GO:0055090     | 0.0001 | acylglycerol homeostasis                                        | hppy                                                                                                          |
| GO:0030534     | 0.0353 | adult behavior                                                  | Hk<br>hiw<br>pum<br>hppy                                                                                      |
| GO:0008106     | 0.0071 | alcohol dehydrogenase (NADP+) activity                          | CG6084                                                                                                        |
| GO:0004032     | 0.0064 | alditol:NADP+ 1-oxidoreductase activity                         | CG6084                                                                                                        |
| GO:0004033     | 0.0071 | aldo-keto reductase (NADP) activity                             | CG6084                                                                                                        |
| GO:0019438     | 0.0029 | aromatic compound biosynthetic process                          | grh<br>crol<br>Snoo<br>bs<br>AP-2<br>Doc2<br>hiw<br>pum<br>Pdfr<br>inv<br>sbb<br>RpIII128                     |
| GO:0007412     | 0.0296 | axon target recognition                                         | sbb                                                                                                           |
| GO:0007610     | 0.0216 | behavior                                                        | Hk<br>mnb<br>Gef64C<br>S6k                                                                                    |

|            |        |                                              |                                                                                                                                |
|------------|--------|----------------------------------------------|--------------------------------------------------------------------------------------------------------------------------------|
|            |        |                                              | Sap47<br>hiw<br>mld<br>pum<br>Pdfr<br>sbb<br>hppy<br>be<br>orb2                                                                |
| GO:0009058 | 0.0287 | biosynthetic process                         | grh<br>crol<br>Snoo<br>bs<br>AP-2<br>Doc2<br>hiw<br>mld<br>pum<br>app<br>Pdfr<br>inv<br>sbb<br>RpIII128<br>orb2                |
| GO:0097367 | 0.0016 | carbohydrate derivative binding              | mnb<br>CG8641<br>S6k<br>RpIII128<br>hppy<br>Pfrx                                                                               |
| GO:0019200 | 0.0305 | carbohydrate kinase activity                 | Pfrx                                                                                                                           |
| GO:0019203 | 0.0278 | carbohydrate phosphatase activity            | Pfrx                                                                                                                           |
| GO:0006725 | 0.0429 | cellular aromatic compound metabolic process | sif<br>Fancd2<br>grh<br>crol<br>CG8641<br>Snoo<br>bs<br>AP-2<br>Doc2<br>hiw<br>Drep-1<br>pum<br>Pdfr<br>inv<br>sbb<br>RpIII128 |
| GO:0044249 | 0.0216 | cellular biosynthetic process                | grh<br>crol<br>Snoo<br>bs<br>AP-2<br>Doc2<br>hiw<br>mld<br>pum<br>app<br>Pdfr<br>inv<br>sbb<br>RpIII128<br>orb2                |
| GO:0034645 | 0.0053 | cellular macromolecule biosynthetic process  | grh<br>crol<br>Snoo<br>bs<br>AP-2                                                                                              |

|            |        |                                                 |                                                                                                                                                                                                                                                   |
|------------|--------|-------------------------------------------------|---------------------------------------------------------------------------------------------------------------------------------------------------------------------------------------------------------------------------------------------------|
|            |        |                                                 | Doc2<br>hiw<br>pum<br>app<br>inv<br>sbb<br>RpIII128<br>orb2                                                                                                                                                                                       |
| GO:0044260 | 0.0027 | cellular macromolecule metabolic process        | Fancd2<br>grh<br>crol<br>mnb<br>SNF4Agamma<br>S6k<br>Snoo<br>bs<br>AP-2<br>Doc2<br>hiw<br>Drep-1<br>pum<br>SelR<br>app<br>inv<br>sbb<br>Ptp99A<br>RpIII128<br>hppy<br>Spase12<br>orb2                                                             |
| GO:0044237 | 0.0069 | cellular metabolic process                      | sif<br>Fancd2<br>grh<br>crol<br>mnb<br>SNF4Agamma<br>CG8641<br>S6k<br>Pi3K68D<br>Snoo<br>CG6428<br>bs<br>AP-2<br>Doc2<br>hiw<br>mld<br>Drep-1<br>pum<br>SelR<br>app<br>Pdf<br>inv<br>sbb<br>Ptp99A<br>RpIII128<br>hppy<br>Spase12<br>Pfrx<br>orb2 |
| GO:0044271 | 0.0040 | cellular nitrogen compound biosynthetic process | grh<br>crol<br>Snoo<br>bs<br>AP-2<br>Doc2<br>hiw<br>pum                                                                                                                                                                                           |

|            |        |                                                  |                                                                                                                                           |
|------------|--------|--------------------------------------------------|-------------------------------------------------------------------------------------------------------------------------------------------|
|            |        |                                                  | Pdfr<br>inv<br>sbb<br>RpIII128                                                                                                            |
| GO:0034641 | 0.0251 | cellular nitrogen compound metabolic process     | sif<br>Fancd2<br>grh<br>crol<br>CG8641<br>Snoo<br>bs<br>AP-2<br>Doc2<br>hiw<br>Drep-1<br>pum<br>Pdfr<br>inv<br>sbb<br>RpIII128<br>Spase12 |
| GO:0032869 | 0.0040 | cellular response to insulin stimulus            | melt<br>hppy                                                                                                                              |
| GO:1901699 | 0.0059 | cellular response to nitrogen compound           | melt<br>hppy                                                                                                                              |
| GO:0071417 | 0.0048 | cellular response to organonitrogen compound     | melt<br>hppy                                                                                                                              |
| GO:1901701 | 0.0445 | cellular response to oxygen-containing compound  | melt<br>hppy                                                                                                                              |
| GO:1901653 | 0.0040 | cellular response to peptide                     | melt<br>hppy                                                                                                                              |
| GO:0071375 | 0.0040 | cellular response to peptide hormone stimulus    | melt<br>hppy                                                                                                                              |
| GO:0048878 | 0.0445 | chemical homeostasis                             | SNF4Agamma<br>hppy                                                                                                                        |
| GO:0003677 | 0.0345 | DNA binding                                      | grh<br>bs<br>AP-2<br>inv<br>RpIII128                                                                                                      |
| GO:0003899 | 0.0001 | DNA-directed RNA polymerase activity             | RpIII128                                                                                                                                  |
| GO:0000428 | 0.0001 | DNA-directed RNA polymerase complex              | RpIII128                                                                                                                                  |
| GO:0005666 | 0.0001 | DNA-directed RNA polymerase III complex          | RpIII128                                                                                                                                  |
| GO:0006003 | 0.0040 | fructose 2,6-bisphosphate metabolic process      | Pfrx                                                                                                                                      |
| GO:0006000 | 0.0040 | fructose metabolic process                       | Pfrx                                                                                                                                      |
| GO:0004331 | 0.0040 | fructose-2,6-bisphosphate 2-phosphatase activity | Pfrx                                                                                                                                      |
| GO:0010467 | 0.0364 | gene expression                                  | grh<br>crol<br>Snoo<br>bs<br>AP-2<br>Doc2<br>hiw<br>pum<br>inv<br>sbb<br>RpIII128<br>Spase12<br>orb2                                      |
| GO:0007030 | 0.0031 | Golgi organization                               | hppy                                                                                                                                      |
| GO:0018130 | 0.0029 | heterocycle biosynthetic process                 | grh<br>crol<br>Snoobs<br>AP-2<br>Doc2<br>hiw<br>pum                                                                                       |

|            |        |                                           |                                                                                                                                                                                       |
|------------|--------|-------------------------------------------|---------------------------------------------------------------------------------------------------------------------------------------------------------------------------------------|
|            |        |                                           | Pdfr<br>inv<br>sbb<br>RpIII128                                                                                                                                                        |
| GO:0046483 | 0.0296 | heterocycle metabolic process             | sif<br>Fancd2<br>grh<br>crol<br>CG8641<br>Snoo<br>bs<br>AP-2<br>Doc2<br>hiw<br>Drep-1<br>pum<br>Pdfr<br>inv<br>sbb<br>RpIII128                                                        |
| GO:0008286 | 0.0040 | insulin receptor signaling pathway        | melt<br>hppy                                                                                                                                                                          |
| GO:0070013 | 0.0001 | intracellular organelle lumen             | RpIII128                                                                                                                                                                              |
| GO:0030537 | 0.0296 | larval behavior                           | S6k<br>sbb                                                                                                                                                                            |
| GO:0055088 | 0.0021 | lipid homeostasis                         | SNF4Agamma<br>hppy                                                                                                                                                                    |
| GO:0009059 | 0.0054 | macromolecule biosynthetic process        | grh<br>crol<br>Snoo<br>bs<br>AP-2<br>Doc2<br>hiw<br>pum<br>app<br>inv<br>sbb<br>RpIII128<br>orb2                                                                                      |
| GO:0043170 | 0.0392 | macromolecule metabolic process           | Fancd2<br>grh<br>crol<br>mnb<br>SNF4Agamma<br>S6k<br>Snoo<br>bs<br>AP-2<br>Doc2<br>hiw<br>Drep-1<br>pum<br>SelR<br>app<br>inv<br>sbb<br>Ptp99A<br>RpIII128<br>hppy<br>Spase12<br>orb2 |
| GO:0031974 | 0.0001 | membrane-enclosed lumen                   | RpIII128                                                                                                                                                                              |
| GO:0010648 | 0.0148 | negative regulation of cell communication | crol<br>Snoo<br>hiw<br>pum                                                                                                                                                            |

|            |        |                                                                           |                                                                                                                                                     |
|------------|--------|---------------------------------------------------------------------------|-----------------------------------------------------------------------------------------------------------------------------------------------------|
|            |        |                                                                           | sbb<br>hppy                                                                                                                                         |
| GO:0042059 | 0.0149 | negative regulation of epidermal growth factor receptor signaling pathway | pum<br>hppy                                                                                                                                         |
| GO:1901185 | 0.0149 | negative regulation of ERBB signaling pathway                             | pum<br>hppy                                                                                                                                         |
| GO:0048585 | 0.0136 | negative regulation of response to stimulus                               | crol<br>Snoo<br>hiw<br>pum<br>sbb<br>hppy                                                                                                           |
| GO:0009968 | 0.0095 | negative regulation of signal transduction                                | crol<br>Snoo<br>hiw<br>pum<br>sbb<br>hppy                                                                                                           |
| GO:0023057 | 0.0148 | negative regulation of signaling                                          | crol<br>Snoo<br>hiw<br>pum<br>sbb<br>hppy                                                                                                           |
| GO:0045879 | 0.0080 | negative regulation of smoothened signaling pathway                       | sbb                                                                                                                                                 |
| GO:0006807 | 0.0475 | nitrogen compound metabolic process                                       | sif<br>Fancd2<br>grh<br>crol<br>CG8641<br>Snoo<br>CG6428<br>bs<br>AP-2<br>Doc2<br>hiw<br>Drep-1<br>pum<br>Pdfr<br>inv<br>sbb<br>RpIII128<br>Spase12 |
| GO:0055029 | 0.0001 | nuclear DNA-directed RNA polymerase complex                               | RpIII128                                                                                                                                            |
| GO:0031981 | 0.0001 | nuclear lumen                                                             | RpIII128                                                                                                                                            |
| GO:0044428 | 0.0050 | nuclear part                                                              | RpIII128                                                                                                                                            |
| GO:0090304 | 0.0097 | nucleic acid metabolic process                                            | Fancd2<br>grh<br>crol<br>Snoo<br>bs<br>AP-2<br>Doc2<br>hiw<br>Drep-1<br>pum<br>inv<br>sbb<br>RpIII128                                               |
| GO:0034654 | 0.0021 | nucleobase-containing compound biosynthetic process                       | grh<br>crol<br>Snoo<br>bs<br>AP-2<br>Doc2<br>hiw                                                                                                    |



|            |        |                                                  |                                                                                                                                       |
|------------|--------|--------------------------------------------------|---------------------------------------------------------------------------------------------------------------------------------------|
|            |        |                                                  | pum<br>Pdfr<br>inv<br>sbb<br>RpIII128                                                                                                 |
| GO:0006139 | 0.0222 | nucleobase-containing compound metabolic process | sif<br>Fancd2<br>grh<br>crol<br>CG8641<br>Snoo<br>bs<br>AP-2<br>Doc2<br>hiw<br>Drep-1<br>pum<br>Pdfr<br>inv<br>sbb<br>RpIII128        |
| GO:0005654 | 0.0001 | nucleoplasm                                      | RpIII128                                                                                                                              |
| GO:0044451 | 0.0001 | nucleoplasm part                                 | RpIII128                                                                                                                              |
| GO:0001882 | 0.0001 | nucleoside binding                               | mnb<br>CG8641<br>S6k<br>RpIII128<br>hppy<br>Pfrx                                                                                      |
| GO:0016779 | 0.0001 | nucleotidyltransferase activity                  | RpIII128                                                                                                                              |
| GO:0043233 | 0.0001 | organelle lumen                                  | RpIII128                                                                                                                              |
| GO:1901362 | 0.0021 | organic cyclic compound biosynthetic process     | grh<br>crol<br>Snoo<br>bs<br>AP-2<br>Doc2<br>hiw<br>mld<br>pum<br>Pdfr<br>inv<br>sbb<br>RpIII128                                      |
| GO:1901360 | 0.0378 | organic cyclic compound metabolic process        | sif<br>Fancd2<br>grh<br>crol<br>CG8641<br>Snoo<br>bs<br>AP-2<br>Doc2<br>hiw<br>mld<br>Drep-1<br>pum<br>Pdfr<br>inv<br>sbb<br>RpIII128 |
| GO:1901576 | 0.0254 | organic substance biosynthetic process           | grh<br>crol<br>Snoo<br>bs<br>AP-2<br>Doc2<br>hiw                                                                                      |

|            |        |                                                                          |                                                                                                                                                                                                                                                   |
|------------|--------|--------------------------------------------------------------------------|---------------------------------------------------------------------------------------------------------------------------------------------------------------------------------------------------------------------------------------------------|
|            |        |                                                                          | mld<br>pum<br>app<br>Pdf<br>inv<br>sbb<br>RpIII128<br>orb2                                                                                                                                                                                        |
| GO:0008443 | 0.0084 | phosphofructokinase activity                                             | Pfrx                                                                                                                                                                                                                                              |
| GO:0043065 | 0.0144 | positive regulation of apoptotic process                                 | hppy                                                                                                                                                                                                                                              |
| GO:0010740 | 0.0378 | positive regulation of intracellular protein kinase cascade              | hppy                                                                                                                                                                                                                                              |
| GO:0046330 | 0.0022 | positive regulation of JNK cascade                                       | hppy                                                                                                                                                                                                                                              |
| GO:0043410 | 0.0140 | positive regulation of MAPK cascade                                      | hppy                                                                                                                                                                                                                                              |
| GO:0032874 | 0.0022 | positive regulation of stress-activated MAPK cascade                     | hppy                                                                                                                                                                                                                                              |
| GO:0070304 | 0.0022 | positive regulation of stress-activated protein kinase signaling cascade | hppy                                                                                                                                                                                                                                              |
| GO:0032008 | 0.0001 | positive regulation of TOR signaling cascade                             | hppy                                                                                                                                                                                                                                              |
| GO:0015459 | 0.0158 | potassium channel regulator activity                                     | Hk                                                                                                                                                                                                                                                |
| GO:0044238 | 0.0205 | primary metabolic process                                                | sif<br>Fancd2<br>grh<br>crol<br>mnb<br>SNF4Agamma<br>CG8641<br>S6k<br>Pi3K68D<br>Snoo<br>CG6428<br>bs<br>AP-2<br>Doc2<br>hiw<br>mld<br>Drep-1<br>pum<br>SelR<br>app<br>Pdf<br>inv<br>sbb<br>Ptp99A<br>RpIII128<br>hppy<br>Spase12<br>Pfrx<br>orb2 |
| GO:0005057 | 0.0217 | receptor signaling protein activity                                      | sif<br>hppy                                                                                                                                                                                                                                       |
| GO:0004702 | 0.0063 | receptor signaling protein serine/threonine kinase activity              | hppy                                                                                                                                                                                                                                              |
| GO:1900076 | 0.0097 | regulation of cellular response to insulin stimulus                      | hppy                                                                                                                                                                                                                                              |
| GO:0080135 | 0.0086 | regulation of cellular response to stress                                | melt<br>SNF4Agamma<br>S6k<br>hppy                                                                                                                                                                                                                 |
| GO:0042058 | 0.0305 | regulation of epidermal growth factor receptor signaling pathway         | pum<br>hppy                                                                                                                                                                                                                                       |
| GO:1901184 | 0.0305 | regulation of ERBB signaling pathway                                     | pum<br>hppy                                                                                                                                                                                                                                       |
| GO:0040008 | 0.0305 | regulation of growth                                                     | S6k<br>hiw<br>pum<br>sbb<br>hppy                                                                                                                                                                                                                  |

|            |        |                                                                 |                                                                                     |
|------------|--------|-----------------------------------------------------------------|-------------------------------------------------------------------------------------|
| GO:0040009 | 0.0001 | regulation of growth rate                                       | hppy                                                                                |
| GO:0046626 | 0.0097 | regulation of insulin receptor signaling pathway                | hppy                                                                                |
| GO:0046328 | 0.0296 | regulation of JNK cascade                                       | hppy                                                                                |
| GO:0080134 | 0.0339 | regulation of response to stress                                | melt<br>grh<br>SNF4Agamma<br>S6k<br>hppy                                            |
| GO:0008589 | 0.0205 | regulation of smoothened signaling pathway                      | sbb                                                                                 |
| GO:0032872 | 0.0297 | regulation of stress-activated MAPK cascade                     | hppy                                                                                |
| GO:0070302 | 0.0297 | regulation of stress-activated protein kinase signaling cascade | hppy                                                                                |
| GO:0032006 | 0.0003 | regulation of TOR signaling cascade                             | hppy                                                                                |
| GO:0032868 | 0.0040 | response to insulin stimulus                                    | melt<br>hppy                                                                        |
| GO:1901698 | 0.0297 | response to nitrogen compound                                   | melt<br>hppy                                                                        |
| GO:0010243 | 0.0246 | response to organonitrogen compound                             | melt<br>hppy                                                                        |
| GO:1901652 | 0.0040 | response to peptide                                             | melt<br>hppy                                                                        |
| GO:0043434 | 0.0040 | response to peptide hormone stimulus                            | melt<br>hppy                                                                        |
| GO:0032549 | 0.0001 | ribonucleoside binding                                          | mnb<br>CG8641<br>S6k<br>RpIII128<br>hppy<br>Pfrx                                    |
| GO:0032774 | 0.0009 | RNA biosynthetic process                                        | grh<br>crol<br>Snoo<br>bs<br>AP-2<br>Doc2<br>hiw<br>pum<br>inv<br>sbb<br>RpIII128   |
| GO:0016070 | 0.0133 | RNA metabolic process                                           | grh<br>crol<br>Snoo<br>bs<br>AP-2<br>Doc2<br>hiw<br>pum<br>inv<br>sbb<br>RpIII128   |
| GO:0034062 | 0.0001 | RNA polymerase activity                                         | RpIII128                                                                            |
| GO:0030880 | 0.0001 | RNA polymerase complex                                          | RpIII128                                                                            |
| GO:0044708 | 0.0020 | single-organism behavior                                        | Hk<br>mnb<br>S6k<br>Sap47<br>hiw<br>mld<br>pum<br>Pdfr<br>sbb<br>hppy<br>be<br>orb2 |
| GO:0036094 | 0.0053 | small molecule binding                                          | mnb                                                                                 |

|                     |        |                                                                 |                                                                                   |
|---------------------|--------|-----------------------------------------------------------------|-----------------------------------------------------------------------------------|
|                     |        |                                                                 | SNF4Agamma<br>CG8641<br>S6k<br>Snoo<br>RpIII128<br>hppy<br>Pfrx<br>orb2           |
| GO:0007224          | 0.0392 | smoothened signaling pathway                                    | sbb                                                                               |
| GO:0005214          | 0.0001 | structural constituent of chitin-based cuticle                  | Cpr65Ay                                                                           |
| GO:0042302          | 0.0001 | structural constituent of cuticle                               | Cpr65Ay                                                                           |
| GO:0050308          | 0.0070 | sugar-phosphatase activity                                      | Pfrx                                                                              |
| GO:0031929          | 0.0012 | TOR signaling cascade                                           | hppy                                                                              |
| GO:0031931          | 0.0003 | TORC1 complex                                                   | hppy                                                                              |
| GO:0003714          | 0.0020 | transcription corepressor activity                              | sbb                                                                               |
| GO:0006383          | 0.0001 | transcription from RNA polymerase III promoter                  | RpIII128                                                                          |
| GO:0006351          | 0.0009 | transcription, DNA-dependent                                    | grh<br>crol<br>Snoo<br>bs<br>AP-2<br>Doc2<br>hiw<br>pum<br>inv<br>sbb<br>RpIII128 |
| GO:0016740          | 0.0001 | transferase activity                                            | mnb<br>SNF4Agamma<br>S6k<br>Pi3K68D<br>app<br>RpIII128<br>hppy<br>Pfrx            |
| GO:0016772          | 0.0001 | transferase activity, transferring phosphorus-containing groups | mnb<br>SNF4Agamma<br>S6k<br>Pi3K68D<br>RpIII128<br>hppy<br>Pfrx                   |
| GO:0070328          | 0.0001 | triglyceride homeostasis                                        | hppy                                                                              |
| GO:0045479          | 0.0347 | vesicle targeting to fusome                                     | bam                                                                               |
| GO:0003873          | 0.0040 | 6-phosphofructo-2-kinase activity                               | Pfrx                                                                              |
| <b>(d) glucose</b>  |        |                                                                 |                                                                                   |
| GO:0004177          | 0.0369 | aminopeptidase activity                                         | sda                                                                               |
| GO:0007638          | 0.0192 | mechanosensory behavior                                         | sda                                                                               |
| <b>(e) glycogen</b> |        |                                                                 |                                                                                   |
| GO:0010309          | 0.0239 | acireductone dioxygenase [iron(II)-requiring] activity          | CG32068                                                                           |
| GO:0006066          | 0.0016 | alcohol metabolic process                                       | Pect                                                                              |
| GO:0009308          | 0.0001 | amine metabolic process                                         | Pect                                                                              |
| GO:0009952          | 0.0002 | anterior/posterior pattern specification                        | dpp<br>shg<br>Wnt6                                                                |
| GO:0008356          | 0.0007 | asymmetric cell division                                        | numb<br>dpp<br>shg                                                                |
| GO:0055059          | 0.0000 | asymmetric neuroblast division                                  | numb                                                                              |
| GO:0009798          | 0.0000 | axis specification                                              | dpp<br>shg<br>Wnt6                                                                |
| GO:0045180          | 0.0000 | basal cortex                                                    | numb                                                                              |

|            |        |                                                           |                                                                                                 |
|------------|--------|-----------------------------------------------------------|-------------------------------------------------------------------------------------------------|
| GO:0045178 | 0.0000 | basal part of cell                                        | numb                                                                                            |
| GO:0009058 | 0.0057 | biosynthetic process                                      | svp<br>RpS28-like<br>dpp<br>bru-2<br>Pect<br>Ptx1<br>Cnx99A<br>Wnt6<br>Camta<br>dnr1<br>CG32068 |
| GO:0006816 | 0.0117 | calcium ion transport                                     | Nckx30C<br>Ca-alpha1D<br>Cnx99A<br>CG9297                                                       |
| GO:0060070 | 0.0000 | canonical Wnt receptor signaling pathway                  | Wnt6                                                                                            |
| GO:0060911 | 0.0034 | cardiac cell fate commitment                              | svp<br>fas                                                                                      |
| GO:0060913 | 0.0000 | cardiac cell fate determination                           | svp<br>fas                                                                                      |
| GO:0042684 | 0.0009 | cardioblast cell fate commitment                          | svp<br>fas                                                                                      |
| GO:0007510 | 0.0000 | cardioblast cell fate determination                       | svp<br>fas                                                                                      |
| GO:0010002 | 0.0003 | cardioblast differentiation                               | svp<br>dpp<br>fas                                                                               |
| GO:0035051 | 0.0000 | cardiocyte differentiation                                | numb<br>svp<br>dpp<br>fas                                                                       |
| GO:0072358 | 0.0000 | cardiovascular system development                         | numb<br>svp<br>dpp<br>shg<br>fas                                                                |
| GO:0005938 | 0.0243 | cell cortex                                               | numb                                                                                            |
| GO:0044448 | 0.0003 | cell cortex part                                          | numb                                                                                            |
| GO:0051301 | 0.0029 | cell division                                             | numb<br>dpp<br>shg<br>nuf                                                                       |
| GO:0045165 | 0.0313 | cell fate commitment                                      | numb<br>svp<br>dpp<br>tutl<br>fas<br>nuf                                                        |
| GO:0060581 | 0.0000 | cell fate commitment involved in pattern specification    | numb<br>nuf                                                                                     |
| GO:0001709 | 0.0000 | cell fate determination                                   | numb<br>svp<br>dpp<br>fas<br>nuf                                                                |
| GO:0060582 | 0.0000 | cell fate determination involved in pattern specification | numb<br>nuf                                                                                     |
| GO:0001708 | 0.0113 | cell fate specification                                   | numb<br>dpp                                                                                     |
| GO:0071944 | 0.0197 | cell periphery                                            | numb<br>NepYr<br>Ca-alpha1D<br>shg<br>kek4<br>Cnx99A<br>Wnt6                                    |

|            |        |                                                                           |                                               |
|------------|--------|---------------------------------------------------------------------------|-----------------------------------------------|
|            |        |                                                                           | CadN2<br>Fas3<br>Sema-1a                      |
| GO:0008283 | 0.0005 | cell proliferation                                                        | numb<br>svp<br>dpp<br>wah                     |
| GO:0007166 | 0.0475 | cell surface receptor signaling pathway                                   | numb<br>dpp<br>NepYr<br>Wnt6<br>Camta Sema-1a |
| GO:0044106 | 0.0001 | cellular amine metabolic process                                          | Pect                                          |
| GO:0006576 | 0.0000 | cellular biogenic amine metabolic process                                 | Pect                                          |
| GO:0071396 | 0.0198 | cellular response to lipid                                                | svp                                           |
| GO:0071407 | 0.0234 | cellular response to organic cyclic compound                              | svp                                           |
| GO:0071383 | 0.0050 | cellular response to steroid hormone stimulus                             | svp                                           |
| GO:0007417 | 0.0007 | central nervous system development                                        | numb<br>svp<br>shg<br>chinmo<br>Sema-1a       |
| GO:0072359 | 0.0000 | circulatory system development                                            | numb<br>svp<br>dpp<br>shg<br>fas              |
| GO:0070567 | 0.0000 | cytidyltransferase activity                                               | Pect                                          |
| GO:0002181 | 0.0000 | cytoplasmic translation                                                   | RpS28-like                                    |
| GO:0044445 | 0.0029 | cytosolic part                                                            | RpS28-like                                    |
| GO:0022626 | 0.0001 | cytosolic ribosome                                                        | RpS28-like                                    |
| GO:0022627 | 0.0000 | cytosolic small ribosomal subunit                                         | RpS28-like                                    |
| GO:0055123 | 0.0348 | digestive system development                                              | svp<br>dpp<br>shg<br>fas                      |
| GO:0048565 | 0.0348 | digestive tract development                                               | svp<br>dpp<br>shg<br>fas                      |
| GO:0048546 | 0.0155 | digestive tract morphogenesis                                             | svp<br>dpp<br>fas                             |
| GO:0072511 | 0.0119 | divalent inorganic cation transport                                       | Nckx30C<br>Ca-alpha1D<br>Cnx99A<br>CG9297     |
| GO:0070838 | 0.0119 | divalent metal ion transport                                              | Nckx30C<br>Ca-alpha1D<br>Cnx99A<br>CG9297     |
| GO:0035050 | 0.0000 | embryonic heart tube development                                          | numb                                          |
| GO:0048619 | 0.0075 | embryonic hindgut morphogenesis                                           | svp<br>dpp<br>fas                             |
| GO:0048568 | 0.0000 | embryonic organ development                                               | numb<br>shg                                   |
| GO:0006897 | 0.0258 | endocytosis                                                               | numb<br>wah                                   |
| GO:0009453 | 0.0001 | energy taxis                                                              | svp                                           |
| GO:0050673 | 0.0012 | epithelial cell proliferation                                             | svp                                           |
| GO:0061331 | 0.0002 | epithelial cell proliferation involved in Malpighian tubule morphogenesis | svp                                           |
| GO:2001013 | 0.0002 | epithelial cell proliferation involved in renal tubule morphogenesis      | svp                                           |
| GO:0042439 | 0.0000 | ethanolamine-containing compound                                          | Pect                                          |

|            |        |                                                                                                |                                                    |
|------------|--------|------------------------------------------------------------------------------------------------|----------------------------------------------------|
|            |        | metabolic process                                                                              |                                                    |
| GO:0004306 | 0.0000 | ethanolamine-phosphate cytidyltransferase activity                                             | Pect                                               |
| GO:0044421 | 0.0003 | extracellular region part                                                                      | dpp<br>CG5867<br>Wnt6                              |
| GO:0005615 | 0.0000 | extracellular space                                                                            | dpp<br>CG5867<br>Wnt6                              |
| GO:0007503 | 0.0000 | fat body development                                                                           | svp                                                |
| GO:0048859 | 0.0001 | formation of anatomical boundary                                                               | numb<br>dpp<br>nuf                                 |
| GO:0010160 | 0.0000 | formation of organ boundary                                                                    | numb<br>dpp<br>nuf                                 |
| GO:0001664 | 0.0000 | G-protein coupled receptor binding                                                             | Wnt6                                               |
| GO:0008347 | 0.0003 | glial cell migration                                                                           | numb                                               |
| GO:0042063 | 0.0034 | gliogenesis                                                                                    | numb                                               |
| GO:0007507 | 0.0000 | heart development                                                                              | numb<br>svp<br>dpp<br>shg<br>fas                   |
| GO:0061525 | 0.0117 | hindgut development                                                                            | svp<br>dpp<br>fas                                  |
| GO:0007442 | 0.0117 | hindgut morphogenesis                                                                          | svp<br>dpp<br>fas                                  |
| GO:0035035 | 0.0006 | histone acetyltransferase binding                                                              | wah                                                |
| GO:0009755 | 0.0155 | hormone-mediated signaling pathway                                                             | svp                                                |
| GO:0042802 | 0.0219 | identical protein binding                                                                      | svp<br>dpp<br>shg<br>Camta                         |
| GO:0004879 | 0.0097 | ligand-activated sequence-specific DNA binding RNA polymerase II transcription factor activity | svp                                                |
| GO:0072002 | 0.0000 | Malpighian tubule development                                                                  | numb<br>svp<br>dpp<br>fas                          |
| GO:0007443 | 0.0053 | Malpighian tubule morphogenesis                                                                | svp<br>dpp<br>fas                                  |
| GO:0061382 | 0.0000 | Malpighian tubule tip cell differentiation                                                     | numb                                               |
| GO:0042693 | 0.0000 | muscle cell fate commitment                                                                    | numb                                               |
| GO:0042694 | 0.0000 | muscle cell fate specification                                                                 | numb                                               |
| GO:0048519 | 0.0335 | negative regulation of biological process                                                      | numb<br>dpp<br>shg<br>bru-2<br>wah<br>Wnt6<br>dnr1 |
| GO:0009890 | 0.0197 | negative regulation of biosynthetic process                                                    | bru-2<br>Wnt6<br>dnr1                              |
| GO:0031327 | 0.0197 | negative regulation of cellular biosynthetic process                                           | bru-2<br>Wnt6<br>dnr1                              |
| GO:0048523 | 0.0082 | negative regulation of cellular process                                                        | numb<br>dpp<br>shg<br>bru-2<br>wah                 |

|            |        |                                                                         |                                            |
|------------|--------|-------------------------------------------------------------------------|--------------------------------------------|
|            |        |                                                                         | Wnt6<br>dnr1                               |
| GO:0010629 | 0.0372 | negative regulation of gene expression                                  | dpp<br>Wnt6                                |
| GO:0051172 | 0.0054 | negative regulation of nitrogen compound metabolic process              | Wnt6<br>dnr1                               |
| GO:0045746 | 0.0000 | negative regulation of Notch signaling pathway                          | numb                                       |
| GO:0045934 | 0.0148 | negative regulation of nucleobase-containing compound metabolic process | Wnt6                                       |
| GO:0051253 | 0.0115 | negative regulation of RNA metabolic process                            | Wnt6                                       |
| GO:0000122 | 0.0005 | negative regulation of transcription from RNA polymerase II promoter    | Wnt6                                       |
| GO:0045892 | 0.0107 | negative regulation of transcription, DNA-dependent                     | Wnt6                                       |
| GO:0061319 | 0.0000 | nephrocyte differentiation                                              | numb dpp                                   |
| GO:0061351 | 0.0001 | neural precursor cell proliferation                                     | numb                                       |
| GO:0014016 | 0.0002 | neuroblast differentiation                                              | numb                                       |
| GO:0055057 | 0.0000 | neuroblast division                                                     | numb                                       |
| GO:0014017 | 0.0000 | neuroblast fate commitment                                              | numb                                       |
| GO:0007400 | 0.0000 | neuroblast fate determination                                           | numb                                       |
| GO:0007405 | 0.0001 | neuroblast proliferation                                                | numb                                       |
| GO:0007270 | 0.0000 | neuron-neuron synaptic transmission                                     | svp                                        |
| GO:0005112 | 0.0000 | Notch binding                                                           | numb                                       |
| GO:0007219 | 0.0055 | Notch signaling pathway                                                 | numb                                       |
| GO:0044545 | 0.0031 | NSL complex                                                             | wah                                        |
| GO:0016779 | 0.0000 | nucleotidyltransferase activity                                         | Pect                                       |
| GO:0048645 | 0.0000 | organ formation                                                         | numb<br>dpp<br>nuf                         |
| GO:0007389 | 0.0007 | pattern specification process                                           | numb<br>dpp<br>shg<br>Wnt6<br>CadN2<br>nuf |
| GO:0061320 | 0.0000 | pericardial nephrocyte differentiation                                  | numb<br>dpp                                |
| GO:0007422 | 0.0042 | peripheral nervous system development                                   | numb<br>tutl                               |
| GO:0042331 | 0.0001 | phototaxis                                                              | svp                                        |
| GO:0009891 | 0.0232 | positive regulation of biosynthetic process                             | Wnt6<br>Camta                              |
| GO:0031328 | 0.0232 | positive regulation of cellular biosynthetic process                    | Wnt6<br>Camta                              |
| GO:0051130 | 0.0085 | positive regulation of cellular component organization                  | numb                                       |
| GO:0045807 | 0.0000 | positive regulation of endocytosis                                      | numb                                       |
| GO:0010628 | 0.0054 | positive regulation of gene expression                                  | Wnt6<br>Camta                              |
| GO:0010557 | 0.0096 | positive regulation of macromolecule biosynthetic process               | Wnt6<br>Camta                              |
| GO:0010604 | 0.0377 | positive regulation of macromolecule metabolic process                  | Wnt6<br>Camta                              |
| GO:0051173 | 0.0195 | positive regulation of nitrogen compound metabolic process              | Wnt6<br>Camta                              |
| GO:0045935 | 0.0117 | positive regulation of nucleobase-containing compound metabolic process | Wnt6<br>Camta                              |
| GO:0051254 | 0.0075 | positive regulation of RNA metabolic process                            | Wnt6<br>Camta                              |
| GO:0045893 | 0.0047 | positive regulation of transcription, DNA-dependent                     | Wnt6<br>Camta                              |
| GO:0051050 | 0.0000 | positive regulation of transport                                        | numb                                       |
| GO:0005515 | 0.0093 | protein binding                                                         | numb<br>svp<br>dpp<br>shg                  |



|            |        |                                                             |                                                                                      |
|------------|--------|-------------------------------------------------------------|--------------------------------------------------------------------------------------|
|            |        |                                                             | wah<br>Cnx99A<br>Edem2<br>Wnt6<br>Camta<br>KLHL18<br>CadN2<br>CG16815 Sema-1a<br>nuf |
| GO:0046982 | 0.0070 | protein heterodimerization activity                         | svp<br>dpp                                                                           |
| GO:0042803 | 0.0114 | protein homodimerization activity                           | svp<br>dpp<br>shg<br>Camta                                                           |
| GO:0048052 | 0.0000 | R1/R6 cell differentiation                                  | svp                                                                                  |
| GO:0007462 | 0.0000 | R1/R6 cell fate commitment                                  | svp                                                                                  |
| GO:0048056 | 0.0157 | R3/R4 cell differentiation                                  | svp                                                                                  |
| GO:0007464 | 0.0156 | R3/R4 cell fate commitment                                  | svp                                                                                  |
| GO:0045466 | 0.0468 | R7 cell differentiation                                     | svp<br>CadN2                                                                         |
| GO:0007465 | 0.0011 | R7 cell fate commitment                                     | svp                                                                                  |
| GO:0005102 | 0.0000 | receptor binding                                            | numb<br>dpp<br>Wnt6<br>Sema-1a                                                       |
| GO:0003002 | 0.0002 | regionalization                                             | numb<br>dpp<br>shg<br>Wnt6<br>nuf                                                    |
| GO:0009786 | 0.0000 | regulation of asymmetric cell division                      | numb                                                                                 |
| GO:0051302 | 0.0000 | regulation of cell division                                 | numb                                                                                 |
| GO:0030100 | 0.0000 | regulation of endocytosis                                   | numb<br>wah                                                                          |
| GO:0032879 | 0.0138 | regulation of localization                                  | numb<br>wah<br>Cnx99A<br>Sema-1a                                                     |
| GO:0008593 | 0.0004 | regulation of Notch signaling pathway                       | numb                                                                                 |
| GO:0006357 | 0.0187 | regulation of transcription from RNA polymerase II promoter | dpp<br>Ptx1<br>Wnt6<br>Camta                                                         |
| GO:0051049 | 0.0004 | regulation of transport                                     | numb<br>wah<br>Cnx99A                                                                |
| GO:0060627 | 0.0000 | regulation of vesicle-mediated transport                    | numb<br>wah                                                                          |
| GO:0061318 | 0.0000 | renal filtration cell differentiation                       | numb<br>dpp                                                                          |
| GO:0072001 | 0.0000 | renal system development                                    | numb<br>svp<br>dpp<br>fas                                                            |
| GO:0061326 | 0.0000 | renal tubule development                                    | numb<br>svp<br>dpp<br>fas                                                            |
| GO:0061333 | 0.0053 | renal tubule morphogenesis                                  | svp<br>dpp<br>fas                                                                    |
| GO:0033993 | 0.0377 | response to lipid                                           | svp                                                                                  |
| GO:0048545 | 0.0050 | response to steroid hormone stimulus                        | svp                                                                                  |
| GO:0007622 | 0.0027 | rhythmic behavior                                           | numb                                                                                 |
| GO:0048511 | 0.0218 | rhythmic process                                            | numb                                                                                 |
| GO:0044391 | 0.0009 | ribosomal subunit                                           | RpS28-like                                                                           |

|            |        |                                                                                                                                                                |                                         |
|------------|--------|----------------------------------------------------------------------------------------------------------------------------------------------------------------|-----------------------------------------|
| GO:0005840 | 0.0024 | ribosome                                                                                                                                                       | RpS28-like                              |
| GO:0000982 | 0.0156 | RNA polymerase II core promoter proximal region sequence-specific DNA binding transcription factor activity                                                    | svp<br>Camta                            |
| GO:0001078 | 0.0005 | RNA polymerase II core promoter proximal region sequence-specific DNA binding transcription factor activity involved in negative regulation of transcription   | svp                                     |
| GO:0001227 | 0.0005 | RNA polymerase II transcription regulatory region sequence-specific DNA binding transcription factor activity involved in negative regulation of transcription | svp                                     |
| GO:0008052 | 0.0000 | sensory organ boundary specification                                                                                                                           | numb<br>nuf                             |
| GO:0045035 | 0.0000 | sensory organ precursor cell division                                                                                                                          | numb                                    |
| GO:0016360 | 0.0000 | sensory organ precursor cell fate determination                                                                                                                | numb<br>nuf                             |
| GO:0015935 | 0.0001 | small ribosomal subunit                                                                                                                                        | RpS28-like                              |
| GO:0048103 | 0.0000 | somatic stem cell division                                                                                                                                     | numb<br>shg                             |
| GO:0048863 | 0.0000 | stem cell differentiation                                                                                                                                      | numb<br>svp<br>dpp<br>shg<br>wah<br>fas |
| GO:0017145 | 0.0003 | stem cell division                                                                                                                                             | numb<br>dpp<br>shg                      |
| GO:0048865 | 0.0001 | stem cell fate commitment                                                                                                                                      | numb                                    |
| GO:0048867 | 0.0000 | stem cell fate determination                                                                                                                                   | numb                                    |
| GO:0072089 | 0.0002 | stem cell proliferation                                                                                                                                        | numb                                    |
| GO:0043401 | 0.0050 | steroid hormone mediated signaling pathway                                                                                                                     | svp                                     |
| GO:0003707 | 0.0055 | steroid hormone receptor activity                                                                                                                              | svp                                     |
| GO:0003735 | 0.0017 | structural constituent of ribosome                                                                                                                             | RpS28-like                              |
| GO:0000795 | 0.0011 | synaptonemal complex                                                                                                                                           | c(3)G                                   |
| GO:0006366 | 0.0168 | transcription from RNA polymerase II promoter                                                                                                                  | dpp<br>Ptx1<br>Wnt6<br>Camta            |
| GO:0035295 | 0.0001 | tube development                                                                                                                                               | numb<br>svp<br>dpp<br>shg<br>fas        |
| GO:0001655 | 0.0000 | urogenital system development                                                                                                                                  | numb<br>svp<br>dpp<br>fas               |
| GO:0007419 | 0.0000 | ventral cord development                                                                                                                                       | numb<br>svp                             |
| GO:0016055 | 0.0002 | Wnt receptor signaling pathway                                                                                                                                 | Wnt6                                    |
| GO:0010309 | 0.0239 | acireductone dioxygenase [iron(II)-requiring] activity                                                                                                         | CG32068                                 |
| GO:0006066 | 0.0016 | alcohol metabolic process                                                                                                                                      | Pect                                    |
| GO:0009308 | 0.0001 | amine metabolic process                                                                                                                                        | Pect                                    |
| GO:0009952 | 0.0002 | anterior/posterior pattern specification                                                                                                                       | dpp<br>shg<br>Wnt6                      |

**Supplementary Table 5 Genes with SNPs significantly associated with more than one microbiota-dependent trait**

|            | Protein                                                                                                      | TAG                                         | Glucose                                                                                                     | Glycogen                                                                                        |
|------------|--------------------------------------------------------------------------------------------------------------|---------------------------------------------|-------------------------------------------------------------------------------------------------------------|-------------------------------------------------------------------------------------------------|
| Dry weight | <i>CG32982</i><br><i>CG43244</i><br><i>CG43316</i><br><i>hh</i><br><i>kek5</i><br><i>rdgA</i><br><i>trol</i> | <i>CG42663</i><br><i>grh</i><br><i>SelR</i> | <i>Ald</i><br><i>CG42324</i><br><i>CR42745</i><br><i>hdc</i><br><i>sda</i><br><i>Sema-5c</i><br><i>Tusp</i> | <i>KLHL18</i>                                                                                   |
| Protein    |                                                                                                              | <i>CG42629</i>                              | <i>dpr6</i><br><i>Dys</i><br><i>jhamt</i>                                                                   | <i>Ca-alpha1D</i><br><i>CadN2</i><br><i>CG5142</i><br><i>Fas3</i><br><i>ImpL3</i><br><i>nuf</i> |
| TAG        |                                                                                                              |                                             | <i>rg</i>                                                                                                   | <i>fas</i>                                                                                      |
| Glucose    |                                                                                                              |                                             |                                                                                                             | <i>syp</i>                                                                                      |

**Supplementary Table 6 *Drosophila* stocks.** The incidence of *Wolbachia*, determined experimentally by diagnostic PCR assay conducted on adult flies, is indicated (y, present; n, absent).

A. DGRP lines

| DGRP line | Wolbachia presence |
|-----------|--------------------|-----------|--------------------|-----------|--------------------|-----------|--------------------|
| RAL_26    | n                  | RAL_158   | n                  | RAL_321   | y                  | RAL_385   | n                  |
| RAL_28    | n                  | RAL_161   | n                  | RAL_332   | n                  | RAL_386   | n                  |
| RAL_38    | n                  | RAL_176   | y                  | RAL_335   | y                  | RAL_392   | n                  |
| RAL_41    | n                  | RAL_181   | y                  | RAL_336   | n                  | RAL_393   | y                  |
| RAL_42    | n                  | RAL_195   | n                  | RAL_338   | y                  | RAL_398   | y                  |
| RAL_45    | n                  | RAL_208   | n                  | RAL_340   | y                  | RAL_399   | n                  |
| RAL_57    | n                  | RAL_217   | n                  | RAL_350   | n                  | RAL_405   | y                  |
| RAL_59    | n                  | RAL_223   | y                  | RAL_352   | y                  | RAL_409   | y                  |
| RAL_69    | y                  | RAL_227   | y                  | RAL_357   | n                  | RAL_426   | n                  |
| RAL_73    | y                  | RAL_228   | n                  | RAL_358   | n                  | RAL_427   | n                  |
| RAL_80    | y                  | RAL_235   | y                  | RAL_360   | y                  | RAL_439   | n                  |
| RAL_83    | n                  | RAL_237   | y                  | RAL_361   | y                  | RAL_440   | y                  |
| RAL_85    | n                  | RAL_239   | n                  | RAL_362   | y                  | RAL_441   | y                  |
| RAL_88    | n                  | RAL_272   | y                  | RAL_365   | n                  | RAL_443   | n                  |
| RAL_91    | n                  | RAL_280   | y                  | RAL_367   | n                  | RAL_461   | y                  |
| RAL_93    | n                  | RAL_303   | n                  | RAL_371   | n                  | RAL_486   | y                  |
| RAL_105   | n                  | RAL_304   | y                  | RAL_373   | n                  | RAL_492   | n                  |
| RAL_109   | n                  | RAL_306   | y                  | RAL_374   | y                  | RAL_502   | n                  |
| RAL_129   | n                  | RAL_309   | n                  | RAL_377   | n                  | RAL_513   | y                  |
| RAL_136   | y                  | RAL_315   | n                  | RAL_379   | n                  | RAL_514   | n                  |
| RAL_149   | y                  | RAL_317   | y                  | RAL_380   | y                  | RAL_531   | y                  |
| RAL_153   | y                  | RAL_318   | y                  | RAL_381   | n                  | RAL_535   | y                  |

|         |   |         |   |         |   |         |   |
|---------|---|---------|---|---------|---|---------|---|
| RAL_554 | y | RAL_750 | y | RAL_821 | y | RAL_882 | y |
| RAL_563 | n | RAL_765 | n | RAL_822 | y | RAL_884 | y |
| RAL_584 | y | RAL_776 | y | RAL_837 | y | RAL_887 | y |
| RAL_642 | n | RAL_783 | y | RAL_842 | y | RAL_890 | y |
| RAL_703 | n | RAL_786 | y | RAL_843 | n | RAL_897 | y |
| RAL_712 | y | RAL_787 | y | RAL_849 | n | RAL_900 | n |
| RAL_714 | n | RAL_796 | y | RAL_850 | y | RAL_907 | n |
| RAL_716 | y | RAL_801 | y | RAL_852 | y | RAL_908 | n |
| RAL_721 | y | RAL_805 | y | RAL_855 | y | RAL_911 | n |
| RAL_737 | y | RAL_808 | n | RAL_857 | y | RAL_913 | y |
| RAL_738 | y | RAL_810 | n | RAL_861 | y |         |   |
| RAL_748 | y | RAL_819 | y | RAL_879 | y |         |   |

## B. Mutant stocks

| Symbol              | Wolbachia | BDSC# | Genotype                                                 | Chr(s) | Breakpoints/Insertions                  |
|---------------------|-----------|-------|----------------------------------------------------------|--------|-----------------------------------------|
| <b>mthl1</b>        | n         | 15318 | y[1] w[67c23] ; P{w[+mC] y[+mDint2]=EPgy2}mthl1[EY00861] | 1      | 14F5, X:16539770..16539770 (R5)         |
| <b>ird5</b>         | n         | 19825 | y[1] w[67c23]; P{w[+mC] y[+mDint2]=EPgy2}ird5[EY02434]   | 1;3    | 89B1, 3R:11875112..11875112 (R5 flank)  |
| <b>HDAC4</b>        | y         | 19942 | y[1] w[67c23]; P{w[+mC] y[+mDint2]=EPgy2}HDAC4[EY08910]  | 1      | 11E8, X:13172806..13172806 (R5 flank)   |
| <b>Edem2</b>        | y         | 21030 | y[1] w[67c23]; P{y[+t7.7] w[+mC]=wHy}Edem2[DG03809]      | 1;2    | 34A9, 2L:13193696..13194225 (R5 flank)  |
| <b>CG32373/Ank2</b> | n         | 22665 | y[1] w[67c23]; Mi{ET1}CG32373[MB00005] Ank2[MB00005]     | 1;3    | 66A10, 3L:7705072..7705072 (R5 flank)   |
| <b>Dscam3</b>       | n         | 22728 | y[1] w[67c23]; Mi{ET1}Dscam3[MB00214]                    | 1;3    | 90B1, 3R:13319443..13319443 (R5 flank)  |
| <b>CG32264</b>      | n         | 22806 | y[1] w[67c23]; Mi{ET1}CG32264[MB00461]                   | 1;3    | 63F1, 3L:3793458..3793458 (R5 flank)    |
| <b>CG7341</b>       | n         | 22937 | y[1] w[67c23]; Mi{ET1}CG7341[MB00927]                    | 1;3    | 75B10, 3L:18113031..18113030 (R5 flank) |
| <b>rg</b>           | y         | 23371 | w[1118]; Mi{ET1}rg[MB01845]                              | 1      | 4F2, X:5101540 (R5 flank)               |
| <b>CG1688</b>       | y         | 23791 | w[1118]; Mi{ET1}CG1688[MB02215]                          | 1;2    | 46B3, 2R:5688310 (R5 flank)             |
| <b>hiw</b>          | y         | 23830 | w[1118]; Mi{ET1}hiw[MB02880] CG5541[MB02880]             | 1      | 13A5, X:14944473 (R5 flank)             |
| <b>Fili</b>         | y         | 23968 | w[1118]; Mi{ET1}Fili[MB02223]                            | 1;2    | 58A3, 2R:17810972 (R5 flank)            |
| <b>CG34113</b>      | y         | 24681 | w[1118]; Mi{ET1}CG34113[MB04218]                         | 1;3    | 83C8, 3R:1755288 (R5 flank)             |
| <b>Ptp99A</b>       | n         | 24843 | w[1118]; Mi{ET1}Ptp99A[MB04947]                          | 1;3    | 99A9, 3R:25242468 (R5 flank)            |
| <b>CG5565</b>       | y         | 25492 | w[1118]; Mi{ET1}CG5565[MB06279]                          | 1;2    | 22A1, 2L:1355053 (R5 flank)             |
| <b>CG15533</b>      | y         | 26036 | w[1118]; Mi{ET1}CG15533[MB05761]                         | 1;3    | 99F4, 3R:26255260 (R5 flank)            |

---

|                |   |       |                                     |     |                                         |
|----------------|---|-------|-------------------------------------|-----|-----------------------------------------|
| <b>CG18437</b> | y | 26099 | w[1118]; Mi{ET1}CG18437[MB08151]    | 1;3 | 98A15, 3R:23494101 (R5 flank)           |
| <b>CG7461</b>  | n | 26409 | w[1118]; Mi{ET1}CG7461[MB08844]     | 1;2 | 56C9, 2R:15193421 (R5 flank)            |
| <b>CG30288</b> | y | 26457 | w[1118]; Mi{ET1}CG30288[MB09262]    | 1;2 | 57E9, 2R:17407616 (R5 flank)            |
| <b>kek4</b>    | y | 29204 | w[1118]; Mi{ET1}kek4[MB11415]       | 1;2 | 34A10, 2L:13213226..13213226 (R5 flank) |
| <b>CG10019</b> | y | 29248 | w[1118]; Mi{ET1}CG10019[MB11741]    | 1;2 | 24C3, 2L:3751143..3751143 (R5 flank)    |
| <b>c(3)G</b>   | n | 30110 | w[1118]; P{w[+mC]=EP}c(3)G[G5001]   | 1;3 | 89A5, 3R:11618273 (R5 flank)            |
| <b>CG7705</b>  | y | 31820 | w[1118]; P{w[+mC]=EP}CG7705[G18394] | 1;3 | 91C1, 3R:14503232 (R5 flank)            |

---

**Supplementary Table 7 Statistical models and sample sizes for genome-wide associations**

| Trait        | Model fitted at each SNP                                                                                                 | Number of DGRP lines tested <sup>†</sup> |
|--------------|--------------------------------------------------------------------------------------------------------------------------|------------------------------------------|
| Dry weight   | $Dry\ weight \sim SNP_i + microbiota + (SNP_i * microbiota) + (day / DGRP\ line)$                                        | 108                                      |
| Glucose      | $Glucose \sim Mean\ line\ dry\ weight + SNP_i + microbiota + (SNP_i * microbiota) + (day / DGRP\ line)$                  | 107                                      |
| Triglyceride | $TAG \sim Mean\ line\ dry\ weight + SNP_i + microbiota + (SNP_i * microbiota) + (day / DGRP\ line)$                      | 107                                      |
| Protein      | $Protein \sim Mean\ line\ dry\ weight + SNP_i + microbiota + (SNP_i * microbiota) + (day / DGRP\ line)$                  | 108                                      |
| Glycogen     | $Glycogen \sim Mean\ line\ dry\ weight + Wolbachia\ status + SNP + microbiota + (SNP * microbiota) + (day / DGRP\ line)$ | 74                                       |

<sup>†</sup> up to 3 replicates per line

## 1 **Supplementary Note 1**

2 This section addresses two potential caveats in our GWAs that are rarely considered in DGRP  
3 studies: inflation of p-values in quantile-quantile (QQ) plots that is indicative of potential mis-  
4 specification of the statistical model; and rationalized assignment of critical probabilities for  
5 identification of SNPs significantly associated with phenotypic traits.

6

7 **Inflation of p-values.** In this study, the QQ plots of p-values for the interaction of SNP and  
8 presence/absence of microbiota were inflated above the null expectation (Supplementary Fig. 5).  
9 From our QQ plots we inferred that the cause of inflation was likely to be universal to all traits  
10 and chromosomes, and therefore we tested ways to ameliorate QQ plot inflation focusing on the  
11 TAG phenotypic data, using two complementary approaches.

12 In the first approach, we conducted a stratified analysis, in which the effect of SNP was  
13 modeled in separate GWAs for axenic and gnotobiotic flies. QQ plots of p-values for SNPs  
14 conformed well to a null distribution (Supplementary Fig. 6a). Certain SNPs were positively  
15 correlated in this analysis whilst others were much more significant in one microbiota condition  
16 than the other (Supplementary Fig. 5b), indicating that this analysis was able to distinguish  
17 putative genotypic effects on the traits under study, and for SNPs with effects specific to the  
18 presence/absence of microbiota. Although this stratified approach is an unconventional means to  
19 test genotype-environment interactions, we sought to test whether it provided independent  
20 corroboration of our full GWA analysis. We reasoned that a SNP with a strong microbiota-  
21 interactive effect would have a low p-value in one microbiota condition and a high p-value in the  
22 other. We calculated the difference in p-values for each SNP in each treatment, and multiplied  
23 negative differences by -1 on the basis that the magnitude of difference matters for determining



24 effects, but not direction of difference. We compared the full and stratified mapping approaches  
25 by correlating p-values of each SNP from the full GWA to the difference in p-value of each SNP  
26 in the two parts of the stratified analysis. These statistics were somewhat correlated, providing  
27 some independent validation of our mapping approach (Supplementary Fig.5c). Of the 11 SNPs  
28 with a GWA p-value ( $-\log_{10}$ )  $\geq 10$ , five showed a difference of  $\geq 3.75$  in p-values ( $-\log_{10}$ ) in the  
29 stratified analysis.

30 As a second approach to reduce p-value inflation, alternative models were tested on the TAG  
31 data and SNPs in the X chromosome. We randomized our data either within or across microbiota  
32 treatments, i.e. generating data that were randomly distributed with respect to genotype or both  
33 genotype and treatment. Inflation was removed by permutation between but not within the two  
34 treatments, confirming that inflation is caused by an unidentified aspect of modeling the  
35 phenotypic data across these treatments. We interpret this result to indicate that additional  
36 microbiota-dependent covariates, the identity of which remains to be established, are required to  
37 fully explain variance in the *Drosophila* traits under study. We tested for effects of variation in  
38 CFU counts associated with gnotobiotic flies, which would not be accounted for by statistically  
39 modeling microbiota as a binary factor in GWAs. We accounted for variation CFU of  
40 *Acetobacter*, *Lactobacilli*, and total CFU in separate analyses, by replacing the binary microbiota  
41 term in our GWAs with mean line CFU, such that gnotobiotic samples were modeled with mean  
42 line CFU ( $\log_{10}N$ ) as a covariate for each bacterial taxon and total CFU (in three separate  
43 analyses), and axenic samples were given a CFU count of zero. GWAs of the interaction of SNP  
44 and these continuous variables remained inflated. We also considered the possibility that  
45 removal of microbiota may have had systematic effects on the water content of flies used in this  
46 study, based on the observation that the microbiota affects dry weight of *Drosophila* from the

47 DGRP (this study) but not the wet weight of wild-type male *Drosophila* Canton S reared on the  
48 same diet used in this study<sup>1,2</sup>. In principle, such effects could cause additional phenotypic  
49 variance when dry weight is used as a covariate. However, QQ plot inflation was not removed by  
50 normalizing dry weights of axenic flies to the dry weights of gnotobiotic flies [this was achieved  
51 by adding the difference in grand means (all lines) of axenic and gnotobiotic dry weight to the  
52 dry weight of axenic flies of each DGRP line]. We also tested whether inflation in the QQ plots  
53 of genome-wide SNP-microbiota interactions could be driven by inflation in the genotype QQ  
54 plots, caused by cryptic population structure in the DGRP. We compressed the genotype matrix  
55 by principal components analysis (PCA) and included the first three principal components as  
56 covariates in the GWA. This approach did not remove inflation from the QQ plots. Other  
57 strategies that did not bring p-values to a null distribution included running GWA of mean trait  
58 values per line without line as a random effect, re-running our GWA in SAS rather than R, and  
59 removal of experimental block as a random effect. These analyses suggest that p-value  
60 distributions, which are not routinely reported in DGRP GWA studies, may commonly deviate  
61 from a null expectation due to an intrinsic property of the lines or the models used to analyse  
62 them, and therefore that inclusion of QQ plots should be a standard for the field.

63

64 **Assignment of critical probabilities.** The critical probability for identifying significant genetic  
65 associations with phenotypic traits is poorly defined because standard corrections for multiple  
66 comparisons are widely recognized as ineligible for GWA studies in the DGRP<sup>3,4</sup>. The widely-  
67 adopted convention is to assign a single arbitrary probability cutoff to determine the statistical  
68 significance of SNPs<sup>3,4</sup>. This was not followed here because our multiple phenotypes have  
69 different distributions of p-values (Supplementary Fig. 1) and a single arbitrary cutoff would,

70 consequently, bias the number of SNPs reported as significantly associated with each trait.  
71 Instead, we focused on the top ranking 0.01% of SNPs (Supplementary Fig. 1), yielding 184-226  
72 SNPs, including SNPs associated with 77-144 genes for each trait, and a total of 436 genes  
73 mapped across the full dataset (Supplementary Table 3). These numbers are similar to those  
74 presented in other recent *Drosophila* GWAs<sup>4,5</sup>.

75

## 76 **References**

- 77 1. Wong, A.C., Dobson, A.J. & Douglas, A.E. Gut microbiota dictates the metabolic response of  
78 *Drosophila* to diet. *J. Exp. Biol.* **217**, 1894-1901 (2014).
- 79 2. Newell, P.D. & Douglas, A.E. Interspecies interactions determine the impact of the gut  
80 microbiota on nutrient allocation in *Drosophila melanogaster*. *Appl. Environ. Microbiol.* **80**,  
81 788-796 (2014).
- 82 3. Jordan, K.W., Craver, K.L., Magwire, M.M., Cubilla, C.E., Mackay, T.F. & Anholt, R.R.  
83 Genome-wide association for sensitivity to chronic oxidative stress in *Drosophila*  
84 *melanogaster*. *PLoS One* **7**, e38722 (2012).
- 85 4. Brown, E.B., Layne, J.E., Zhu, C., Jegga, A.G. & Rollmann, S.M. Genome-wide association  
86 mapping of natural variation in odour-guided behaviour in *Drosophila*. *Genes, Brain Behav.*  
87 **12**, 503-515 (2013).
- 88 5. Burke, M.K., King, E.G., Shahrestani, P., Rose, M.R. & Long, A.D. Genome-wide association  
89 study of extreme longevity in *Drosophila melanogaster*. *Genome Biol. Evol.* **6**, 1-11 (2014).

90

91
